# Supplementary material
Source: publisher site journal article supplement (https://www.dovepress.com/article/382587)
Supplement: Supplementary file 1 [file get_supplementary_file.php]

**Supplementary materials**

Malnutrition is associated with an increased risk of death in hospitalized patients with active pulmonary tuberculosis: a propensity score matched retrospective cohort study

**Catalogue**

[Appendix 1. Diagnostic criteria for active tuberculosis 3](#_Toc743436416)

[Appendix 2. Diagnostic basis for diseases included in this study 7](#_Toc875985466)

[Supplementary Figure 1. Flow diagram for recruitment of patients 8](#_Toc1687326877)

[eTable 1. Clinical characteristics of entire study cohort based on BMI grouping 9](#_Toc1381263104)

[eTable 2. Statistics of missing value and extremesa 10](#_Toc590764858)

[eTable 3. Tuberculosis characteristics of patients 11](#_Toc1168068325)

[eTable 4. Logistic regression analysis of all-cause mortality during hospitalization based on BMI grouping 172](#_Toc1576321048)

[eTable 5. Clinical characteristics of propensity score matched patient pairs based on BMI grouping 173](#_Toc1869584344)

[Supplementary Figure 2. ROC curve analysis of GNRI and BMI for all-cause death 174](#_Toc123346704)

[eTable 6. Quantitative comparison of ROC curve analysis between GNRI and BMI 175](#_Toc766334773)

## Appendix 1. Diagnostic criteria for active tuberculosis

**Diagnostic basis**

1. Epidemiological history

History of exposure to tuberculosis patients.

1. Clinical manifestation

2.1 Symptom

Cough and expectoration for ≥ 2 weeks, or bloody or hemoptysis in sputum as tuberculosis suspicious symptoms.

Tuberculosis is mostly slow in onset, and some patients can be asymptomatic and detected only on chest imaging. As the lesion progresses, cough, expectoration, bloody sputum, or hemoptysis may occur, and some patients may have recurrent symptoms of upper respiratory tract infection. Tuberculosis can also present with systemic symptoms such as night sweats, fatigue, intermittent or persistent midday low-grade fever, loss of appetite, weight loss, and can be accompanied by menstrual dysregulation or amenorrhea in women. A minority of patients have an acute onset with moderate to high fever, which is partially accompanied by varying degrees of dyspnea.

Lesions occurring in the pleura can have symptoms such as irritating cough, chest pain, and dyspnea.

Lesions occur in the trachea and bronchus in those with an irritant cough, are longer lasting, and bronchial lymphoid fistulas form and rupture into the endobronchi or bronchial stenosis may present with wheezing or dyspnea.

A minority of patients may present with tuberculous hypersensitivity syndrome, which may include: erythema nodosum, herpetic conjunctivitis or keratitis, among others.

Tuberculosis in children can also present with developmental delay, primary tuberculosis in children can compress the trachea or bronchi due to tracheal or parabronchial lymphadenopathy, or develop lymph node bronchial fistulas, often presenting with wheezing symptoms.

When combined with extrapulmonary TB, symptoms of the respective organ involvement can occur.

2.2 Sign

Early pulmonary signs are not obvious, and wet rales are present when the lesion is more involved, when there is dullness on local percussion, when auscultation is audible with tubular breath sounds, or when there is coinfection or bronchiectasis.

The lesion involves the trachea and bronchus, causes localized stenosis when auscultated and is a fixed, localized wheeze, and when atelectasis is induced, it may demonstrate displacement of the trachea to the affected side, collapse of the affected side of the thorax, narrowing of the intercostal space, dullness or solid on percussion, and diminished or abolished auscultatory breath sounds.

When the lesion involves the pleura, it is audible to the affected side early on, and as pleural effusion increases, the affected side has a full thorax with widened intercostal spaces, displacement of the trachea to the healthy side, dullness to solid on percussion, and diminished to absent auscultatory breath sounds. When the effusion has decreased or disappeared, pleural thickening and adhesion may occur, the trachea is displaced to the affected side, the affected side of the thorax may collapse, the intercostal spaces become narrowed, respiratory motion is limited, percussion is dullness, and auscultation is reduced.

Primary tuberculosis may present with superficial lymphadenopathy, hematogenous disseminated tuberculosis may present with hepatosplenomegaly, choroidal nodules in the fundus, and cutaneous miliary rash in pediatric patients.

1. Chest imaging

3.1 Primary pulmonary tuberculosis

Primary pulmonary tuberculosis is mainly characterized by the presence of a primary lesion in the lung and intrathoracic lymphadenopathy, or isolated intrathoracic lymphadenopathy. Primary tuberculosis in children can also present with cavitation, caseating pneumonia, and bronchial tuberculosis resulting from broncholymphatic fistulas.

3.2 Hematogenous disseminated pulmonary tuberculosis

Acute hematogenous disseminated TB presents as miliary shadows of uniform size and density in both lungs; Diffuse foci of subacute or chronic hematogenous disseminated tuberculosis, which are mostly distributed in the upper and middle portions of both lungs, vary in size and density, and may have fusion. Acute hematogenous disseminated tuberculosis in children sometimes presents only as ground glass opacities, with prominent exudation around miliary lesions in infants and young children with indistinct margins that are easily confluent.

3.3 Secondary pulmonary tuberculosis

The chest imaging findings of secondary tuberculosis are diverse. Light cases mainly showed patches, nodules and cord shadows, or tuberculoma or solitary cavity; Severe cases can be manifested as lobar infiltration, caseous pneumonia, multiple cavity formation and bronchial dissemination; In patients with repeated migration progressors may show lung lesions with reduced volume of lesional lung tissue, multiple fibro thick walled cavities within them, secondary bronchiectasis or associated with multiple calcifications, traction displacement of adjacent hilar and mediastinal structures, collapse of the thorax, pleural thickening and adhesions, compensatory emphysema and new and different foci of bronchial dissemination in other lung tissues.

3.4 Tuberculosis of trachea and bronchus

The main manifestations of tracheal and bronchial tuberculosis are irregular thickening of tracheal or bronchial wall, stenosis or obstruction of lumen, secondary atelectasis or consolidation of lung tissue at the distal end of narrow bronchus, bronchiectasis and bronchial disseminated lesions in other parts.

3.5 Tuberculous pleurisy

Tuberculous pleurisy is divided into dry pleurisy and exudative pleurisy. Dry pleurisy is an early inflammatory reaction of the pleura, usually without obvious imaging findings; Exudative pleurisy is mainly characterized by pleural effusion, which can present as a small or medium to large amount of free fluid, or as a localized effusion present in any part of the thorax, slow absorption often combined with pleural thickening and adhesions, and can also evolve to pleural tuberculoma and empyema and so on.

1. Laboratory examination

4.1 Bacteriological examination

A) Smear microscopy was positive;

B) Mycobacterial culture was positive and the species was identified as mycobacterium tuberculosis complex.

4.2 Molecular biology examination

Mycobacterium tuberculosis nucleic acid test was positive.

4.3 Examination of TB pathology

TB histopathological changes are shown in Appendix C in references.

4.4 Immunological examination

4.4.1 The tuberculin skin test was moderately or strongly positive.

4.4.2 γ- Interferon release test was positive.

4.4.3 Tuberculosis antibody was positive.

1. Bronchoscopy

Bronchoscopy allows direct visualization of tracheal and bronchial lesions, as well as aspiration of secretions, brushings, and biopsy.

**Diagnosis**

1. Suspected case

Where one of the following items is met:

1. Having any one of the diagnostic basis 3;
2. Children under 5 years old: have diagnostic basis 2, and having any one of the diagnostic basis 1, 4.4.1, or 4.4.2.
3. Clinically diagnosed cases

Other lung diseases are excluded after differential diagnosis, and one of the following items is met:

1. Having any one of the diagnostic basis 3, and meeting 2.;
2. Having any one of the diagnostic basis 3, and meeting 4.4.1;
3. Having any one of the diagnostic basis 3, and meeting 4.4.2;
4. Having any one of the diagnostic basis 3, and meeting 4.4.3;
5. Having any one of the diagnostic basis 3, and the extrapulmonary histopathological confirmation of tuberculous lesions;
6. Having diagnostic basis 3.4 and 5, which can be diagnosed with tracheal and bronchial TB;
7. Having diagnostic basis 3.5 and pleural fluid as exudate, elevated adenosine deaminase, and having any one of the diagnostic basis 4.4.1, 4.4.2. or 4.4.3, which can be diagnosed with tuberculous pleurisy;
8. The clinical diagnosis of pulmonary tuberculosis in children shall meet the following two requirements at the same time:
9. Having any one of the diagnostic basis 3, and meeting 2;
10. Having any one of the diagnostic basis 4.4.1 and 4.4.2.
11. Confirmed cases

3.1 Diagnosis of pulmonary tuberculosis with positive sputum smear

Where one of the following items is met:

1. Acid fast bacilli in smear of 2 sputum samples are in accordance with the diagnostic basis 4.1 A);
2. Acid fast bacilli in smear of 1 sputum samples are in accordance with the diagnostic basis 4.1 A), and having any one of the diagnostic basis 3;
3. Acid fast bacilli in smear of 1 sputum samples are in accordance with the diagnostic basis 4.1 A), and 1 sputum sample mycobacterium culture met the requirements of 4.1 B).

3.2 Diagnosis of pulmonary tuberculosis with positive mycobacterium isolation and culture only

Comply with any one of the diagnostic basis 3, and at least 2 sputum specimens are smear negative, and mycobacterium culture complies with 4.1 B).

3.3 Diagnosis of pulmonary tuberculosis with positive molecular biological examination

Having any one of the diagnostic basis 3, and meeting 4.2.

3.4 Diagnosis of pulmonary tuberculosis with positive histopathological examination

Having diagnostic basis 4.3.

3.5 Diagnosis of tracheal and bronchial tuberculosis

Where one of the following items is met:

1. Having diagnostic basis 5 and the pathological examination of trachea and bronchus meet 4.3;
2. Having diagnostic basis 5 and the etiological examination of tracheal and bronchial secretions was in accordance with 4.1. A), 4 1. B) or 4 2.

3.6 Diagnosis of tuberculous pleurisy

Where one of the following items is met:

1. Having diagnostic basis 3 and the pleural fluid or pleura pathological examination in accordance with 4.3;
2. Having diagnostic basis 3 and the etiological examination of pleural effusion was in accordance with 4.1 A), 4.1 B) or 4 2.
3. Tuberculosis activity judgment

4.1 Active tuberculosis

It has the clinical symptoms and signs of tuberculosis, and the evidence of active tuberculosis is found in the etiology, pathology and imaging examination of mycobacterium tuberculosis.

4.2 Inactive tuberculosis

4.2.1 Inactive pulmonary tuberculosis

No clinical symptoms and signs related to active tuberculosis, negative bacteriological examination, only one or more manifestations of imaging examination, and excluding lung imaging changes caused by other reasons.

4.2.2 Inactive extrapulmonary tuberculosis

The diagnosis of inactive extrapulmonary tuberculosis shall refer to inactive pulmonary tuberculosis.

## Appendix 2. Diagnostic basis for diseases included in this study

**Miocardial infarction**

Includis ST segment elevation myocardial infarction and non ST segment elevation myocardial infarction

**Congestive heart failure**

Requires at least one sign (dependent edema,, rales) or one symptom (shortness of breath, or thopnea, paroxysmal nocturnal dyspnea), plus either:

One positive diagnostic test, such as:

• BNP >100 pg/ml

• NT-pro BNP >1,800 pg/ml

• chest X-ray showing pulmonary congestion, edema or pleural effusion

Or

• Needing diuretic, nitrate or inotropic agent to treat the heart failure

**Cerebrovascular disease**

Includes stroke and intracranial hemorrhage.

**Connective tissue disease**

Mainly includes systemic lupus erythematosus, Sjogren's syndrome, rheumatoid arthritis, dermatomyositis, scleroderma, polymyositis, ankylosing spondylitis, gouty arthritis, rheumatoid arthritis, serum negative spondyloarthropathy, etc

**Ulcer disease**

Mainly includes Peptic ulcer

**Moderate/severe nephropathy**

Moderate / severe nephropathy is defined as GFR < 60 min*1.73m2, the calculation of GFR refers to the method of levey et al ( DOI: 10.7326/0003-4819-130-6-199903160-00002).

**Liver disease**

• Mild liver disease s defined as a diagnosis of ALT greater than 3 times the upper limit of normal, or liver function impairment in the discharge summary.

• Moderate / severe liver disease is defined as cirrhosis or liver failure in the discharge summary.

**Multidrug-resistant tuberculosis**

Mycobacterium tuberculosis is resistant to at least two first-line anti tuberculosis drugs including isoniazid and rifampicin.

**All-cause death**

All cause death was defined as death from any cause.

**Other diseases included in this study**

The diagnosis basis of other diseases included in this study is based on the discharge summary.

## Supplementary Figure 1. Flow diagram for recruitment of patients


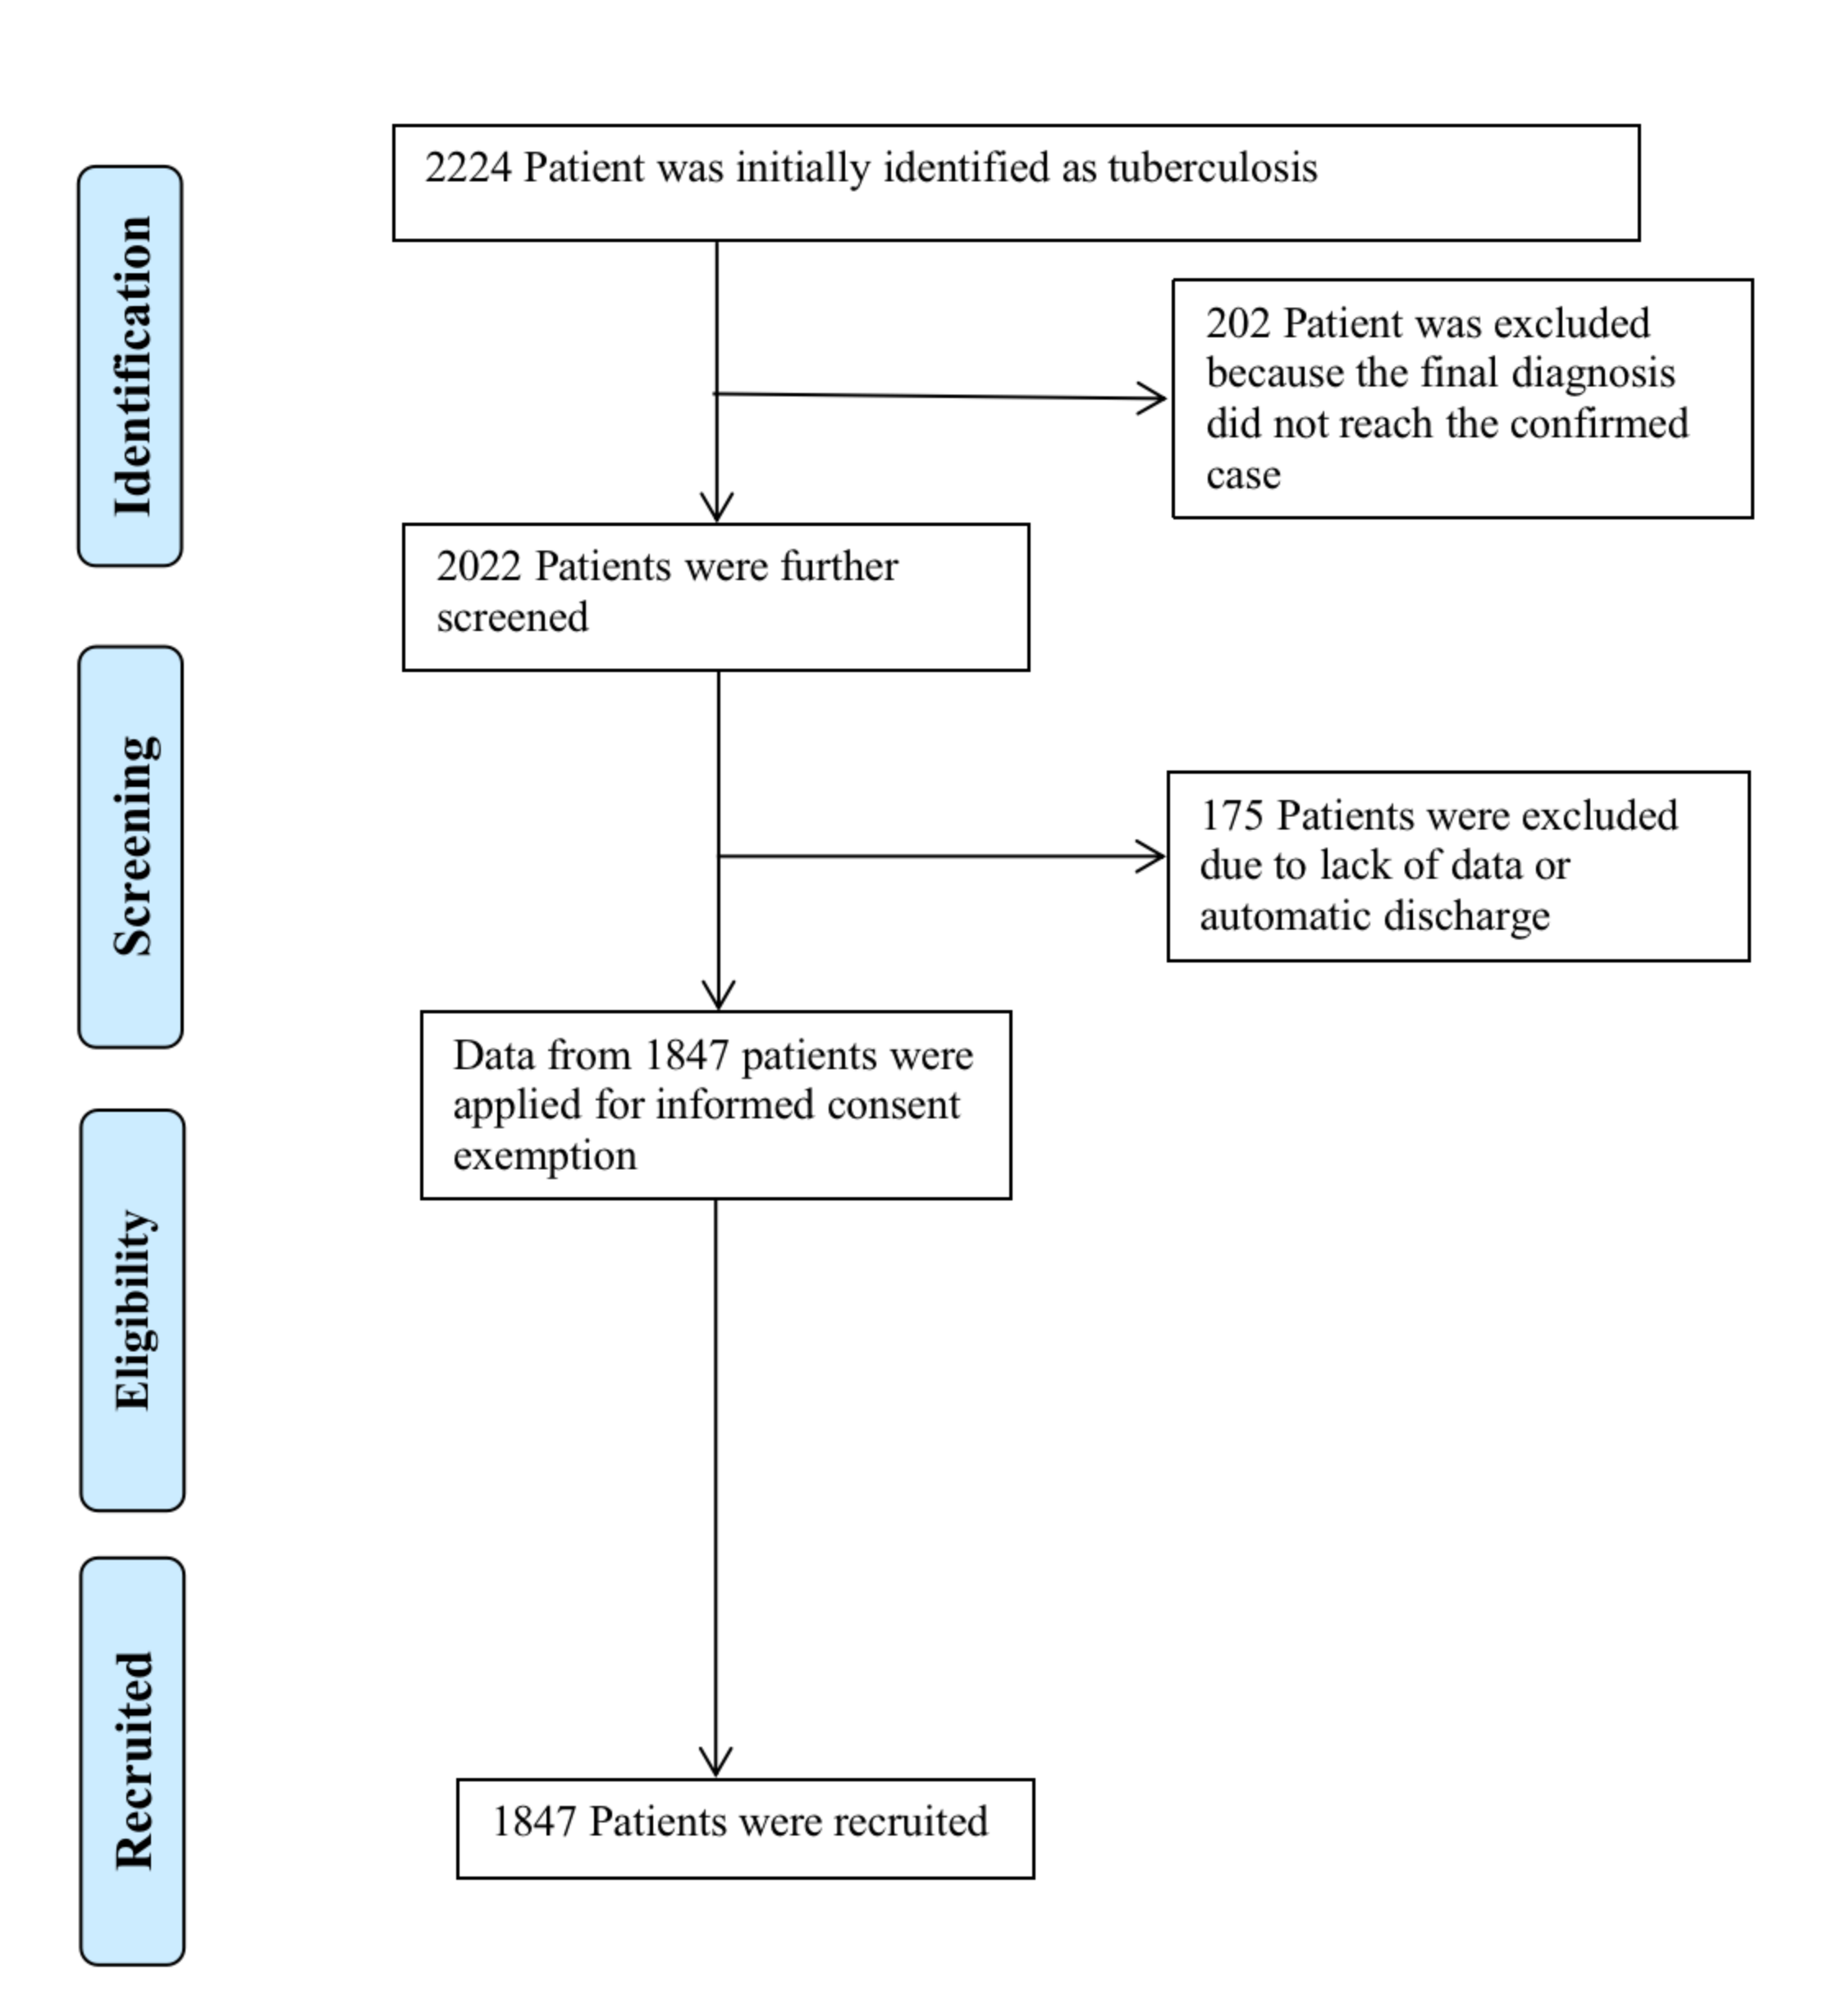


## eTable 1. Clinical characteristics of entire study cohort based on BMI grouping

|  | Control (n=1207) | Malnutrition based on BMI  (n=640) | P  Value | Standardized Difference |
| --- | --- | --- | --- | --- |
| Age, years | 55 (34.0-67.0) | 58 (33.0-72.0) | 0.009 | 0.125 |
| Female sex, no. (%) | 357 (29.6) | 221 (34.5) | 0.029 | 0.104 |
| Previous MI, no. (%) | 2 (0.2) | 1 (0.2) | >0.999 | -0.002 |
| CHF, no. (%) | 68 (5.6) | 65 (10.2) | <0.001 | 0.150 |
| PVD, no. (%) | 12 (1.0) | 5 (0.8) | 0.648 | -0.024 |
| CBVD, no. (%) | 39 (3.2) | 26 (4.1) | 0.356 | 0.042 |
| Hemiplegia, no. (%) | 2 (0.2) | 0 (0) | 0.547 | <0.001 |
| Dementia, no. (%) | 5 (0.4) | 1 (0.2) | 0.619 | -0.065 |
| COPD/asthma, no. (%) | 66 (5.5) | 59 (9.2) | 0.002 | 0.130 |
| CTD, no. (%) | 34 (2.8) | 25 (3.9) | 0.205 | 0.056 |
| UD, no. (%) | 11 (0.9) | 3 (0.5) | 0.446 | -0.065 |
| Diabetes, no. (%) |  |  |  |  |
| Without complication | 236 (19.6) | 71 (11.1) | <0.001 | -0.269 |
| With complications | 52 (4.3) | 17 (2.7) | 0.075 | -0.103 |
| Moderate/severe nephropathy, no. (%) | 127 (10.5) | 60 (9.4) | 0.437 | -0.039 |
| Liver disease, no. (%) |  |  |  |  |
| Mild | 19 (1.6) | 7 (1.1) | 0.404 | -0.046 |
| Moderate/severe | 15 (1.2) | 14 (2.2) | 0.120 | 0.065 |
| Tumor, no. (%) |  |  |  |  |
| No metastasis | 55 (4.6) | 26 (4.1) | 0.622 | -0.025 |
| Metastasis | 3 (0.2) | 5 (0.8) | 0.198 | 0.060 |
| Leukemia, no. (%) | 1 (0.1) | 0 (0) | >0.999 | <0.001 |
| Lymphoma, no. (%) | 0 (0) | 0 (0) | - | <0.001 |
| AIDS, no. (%) | 5 (0.4) | 2 (0.3) | >0.999 | -0.018 |
| MDR-TB, no. (%) | 87 (7.2) | 63 (9.8) | 0.048 | 0.088 |

eTable 1. Clinical characteristics of entire study cohort based on BMI grouping. AIDS: acquired immune deficiency syndrome, BMI: Body Mass Index, CBVD: cerebral vascular disease, CHF: Congestive heart failure, COPD: chronic obstructive pulmonary disease, CTD: connective tissue disease, MDR-TB: multidrug-resistant tuberculosis, MI: myocardial infarction, PVD: peripheral vascular disease, UD: ulcer disease. Values are numbers (%) or medians (interquartile ranges).

## eTable 2. Statistics of missing value and extremesa

|  | N | Mean | Std. Deviation | Missing | | No. of Extremesa | |
| --- | --- | --- | --- | --- | --- | --- | --- |
| Count | Percent | Low | High |
| Age | 1847 | 52.98 | 19.761 | 0 | 0.0 | 0 | 0 |
| Height | 1847 | 1.66006 | 0.076534 | 0 | 0.0 | 1 | 1 |
| Weight | 1847 | 55.153 | 10.6028 | 0 | 0.0 | 1 | 32 |
| Albumin | 1829 | 35.004 | 9.3455 | 18 | 1.0 | 8 | 1 |
| Alanine aminotransferase | 1831 | 28.29 | 63.931 | 16 | 0.9 | 0 | 179 |
| Creatinine | 1832 | 85.9566 | 81.61510 | 15 | 0.8 | 6 | 105 |
| Urea | 1832 | 5.2839 | 3.76939 | 15 | 0.8 | 0 | 102 |
| a Number of cases outside the range (Q1 - 1.5*IQR, Q3 + 1.5*IQR). | | | | | | | |

## eTable 3. Tuberculosis characteristics of patients

| Sequnce | Clinical manifestation | Chest imaging | Smear microscopy | Mycobacterial culture | Molecular biology examination | Examination of TB pathology | Immunological examination | Drug resistance | Treatment history | Diagnosis |
| --- | --- | --- | --- | --- | --- | --- | --- | --- | --- | --- |
| 1 | Cough and expectoration for more than two weeks | Lung CT showed pulmonary tuberculosis. | Negative | Positive | Positive | NA | NA | Non drug resistance | Primary treatment | Confirmed active case |
| 2 | Fatigue and anorexia for 1 month | Lung CT showed chestnut shadow pulmonary tuberculosis | Two sputum smears were positive. | Positive | Positive | NA | NA | Non drug resistance | Primary treatment | Confirmed active case |
| 3 | Cough and expectoration for one week | Lung CT showed chestnut shadows on both lungs | Two sputum smears were positive. | Positive | Positive | NA | NA | Non drug resistance | Primary treatment | Confirmed active case |
| 4 | Cough and expectoration for more than two weeks | Lung CT showed pulmonary tuberculosis. | Negative | Negative | Positive | NA | NA | Non drug resistance | Retreatment | Confirmed active case |
| 5 | Weakness | Lung CT showed pulmonary tuberculosis. | One sputum smears were positive. | Positive | Positive | NA | NA | Non drug resistance | Retreatment | Confirmed active case |
| 6 | Chest and back pain for half a year | Lung CT showed chestnut granular and nodular shadows in both lungs | One sputum smears were positive. | Positive | Positive | NA | Negative | Non drug resistance | Primary treatment | Confirmed active case |
| 7 | Chest tightness and shortness of breath | Lung CT showed infectious lesions of both lungs with cavity shadow | Three sputum smears were positive. | NA | Positive | NA | NA | Non drug resistance | Primary treatment | Confirmed active case |
| 8 | Cough and expectoration for more than two weeks | Lung CT showed pulmonary tuberculosis. | Two sputum smears were positive. | Negative | Positive | NA | Negative | Non drug resistance | Primary treatment | Confirmed active case |
| 9 | Cough and expectoration for more than two weeks | Lung CT showed old pulmonary tuberculosis with two lung injuries . | Two sputum smears were positive. | Positive | Positive | NA | NA | Non drug resistance | Retreatment | Confirmed active case |
| 10 | Cough and expectoration for more than two weeks | Lung CT showed pulmonary tuberculosis. | Negative | Negative | Positive | NA | Positive | Non drug resistance | Retreatment | Confirmed active case |
| 11 | Gastric anorexia | Lung CT showed shadows of two lung cavities | One sputum smears were positive. | Positive | Positive | NA | NA | Non drug resistance | Primary treatment | Confirmed active case |
| 12 | Cough and expectoration for more than one week | Lung CT showed the shadow of the upper right cavity of two lung infections | Three sputum smears were positive. | Positive | Positive | NA | NA | Non drug resistance | Primary treatment | Confirmed active case |
| 13 | Cough and expectoration for more than two weeks | Lung CT showed shadows of two lung cavities | One sputum smears were positive. | Positive | Positive | NA | NA | Rifampicin | Retreatment | Confirmed active case |
| 14 | Chest tightness and shortness of breath for 10 years | Lung CT showed grid patchy increased density shadow in both lungs | Negative | Negative | Positive | NA | NA | NA | Retreatment | Confirmed active case |
| 15 | Cough for more than two weeks | Lung CT showed pulmonary tuberculosis. | Three sputum smears were positive. | Positive | Positive | NA | NA | Non drug resistance | Primary treatment | Confirmed active case |
| 16 | Cough and expectoration for more than two weeks | Lung CT showed pulmonary tuberculosis with cavity shadow | Two sputum smears were positive. | Positive | Positive | NA | NA | Streptomycin, rifampicin, isoniazid, ethambutol | Retreatment | Confirmed active case |
| 17 | Cough and expectoration for more than two weeks | Lung CT showed chestnut shadow and small cavity shadow in both lungs | Two sputum smears were positive. | Positive | Positive | NA | NA | Non drug resistance | Primary treatment | Confirmed active case |
| 18 | Fever for 1 day | Lung CT shows that it may be pulmonary tuberculosis with cavity shadow | Negative | Positive | Positive | NA | NA | NA | Primary treatment | Confirmed active case |
| 19 | Nausea, vomiting and shortness of breath for 1 month | Lung CT showed the shadow of right pulmonary cavity | Two sputum smears were positive. | Positive | Positive | NA | NA | Non drug resistance | Primary treatment | Confirmed active case |
| 20 | Cough and expectoration with blood in sputum for 8 weeks | Lung CT showed scattered flake high-density shadows in both lungs | One sputum smears were positive. | Positive | Positive | NA | NA | NA | Primary treatment | Confirmed active case |
| 21 | Cough and expectoration for more than two weeks | Lung CT showed multiple patchy and ground glass shadows in both lungs | Negative | Negative | Positive | NA | NA | NA | Retreatment | Confirmed active case |
| 22 | Cough and expectoration for more than two weeks | Lung CT showed left lower lobe tuberculosis with cavity shadow . | One sputum smears were positive. | Positive | Positive | NA | NA | NA | Primary treatment | Confirmed active case |
| 23 | Fever for 2 days | Lung CT showed multiple patchy high-density shadows in both lungs | Three sputum smears were positive. | Positive | NA | NA | NA | NA | Primary treatment | Confirmed active case |
| 24 | Hemoptysis for 3 days | Lung CT showed that there was a high possibility of pulmonary tuberculosis in both lungs with cavity shadow. | Two sputum smears were positive. | Positive | Positive | NA | NA | Non drug resistance | Retreatment | Confirmed active case |
| 25 | Tuberculosis treatment for 1 week | Lung CT shows that it may be pulmonary tuberculosis with nodules, spots and strips of high-density shadow | Negative | Positive | Positive | NA | NA | Non drug resistance | Retreatment | Confirmed active case |
| 26 | Asthenia, anorexia and fever for 2 months | Lung CT showed increased chestnut density in both lungs | NA | Positive | Positive | NA | NA | Non drug resistance | Retreatment | Confirmed active case |
| 27 | Cough and expectoration for more than two weeks | Lung CT showed that both lungs may be pulmonary tuberculosis with multiple cavity shadows in both upper lungs | Two sputum smears were positive. | NA | NA | NA | NA | NA | Retreatment | Confirmed active case |
| 28 | Cough and expectoration for more than two weeks | Lung CT showed that both lungs may be pulmonary tuberculosis | One sputum smears were positive. | Positive | Positive | NA | NA | NA | Primary treatment | Confirmed active case |
| 29 | Cough, expectoration and hemoptysis for 20 years | Lung CT shows that it may be pulmonary tuberculosis with cavity and multiple nodule shadow | One sputum smears were positive. | Positive | Positive | NA | NA | Streptomycin, rifampicin, isoniazid, ethambutol | Retreatment | Confirmed active case |
| 30 | Cough and expectoration for 7 years and hemoptysis for 1 month | Lung CT showed pulmonary tuberculosis and left lung injury | Negative | Negative | Positive | NA | NA | NA | Retreatment | Confirmed active case |
| 31 | Cough and expectoration for more than two weeks | Lung CT showed that it may be pulmonary tuberculosis with shadow of left upper pulmonary cavity | Negative | NA | Positive | NA | NA | Non drug resistance | Retreatment | Confirmed active case |
| 32 | Cough for 2 years and hemoptysis for half a day | Lung CT showed pulmonary tuberculosis | One sputum smears were positive. | Positive | Positive | NA | NA | Rifampicin | Retreatment | Confirmed active case |
| 33 | Cough and expectoration for 6 days | Lung CT showed large cavity shadow in the upper lobe of the right lung, multiple nodules and small cavity shadow in both lungs, which may be pulmonary tuberculosis | Negative | Positive | Positive | NA | NA | Non drug resistance | Retreatment | Confirmed active case |
| 34 | Fecal and urinary incontinence for 1 month | Lung CT showed pulmonary tuberculosis. | Negative | NA | Positive | NA | NA | Non drug resistance | Retreatment | Confirmed active case |
| 35 | Cough and expectoration for more than two weeks | Lung CT showed a small amount of patchy and nodular increased density shadow in both lungs | Negative | Negative | Positive | NA | Positive | NA | Primary treatment | Confirmed active case |
| 36 | Cough and expectoration for more than two weeks | Lung CT showed pulmonary tuberculosis with cavity shadow | One sputum smears were positive. | Positive | Positive | NA | NA | NA | Primary treatment | Confirmed active case |
| 37 | NA | Lung CT showed that it may be pulmonary tuberculosis with scattered patchy high-density shadow of the left lung | Negative | Positive | Positive | NA | NA | NA | Primary treatment | Confirmed active case |
| 38 | NA | Lung CT showed left upper pulmonary tuberculosis with cavity shadow | Three sputum smears were positive. | Positive | Positive | NA | NA | NA | Primary treatment | Confirmed active case |
| 39 | Asthenia and anorexia for 2 weeks | Lung CT showed patchy fuzzy high-density shadows of both lungs | Two sputum smears were positive. | Positive | Positive | NA | NA | NA | Primary treatment | Confirmed active case |
| 40 | Cough and expectoration for more than two weeks | Lung CT showed multiple nodules in both lungs | One sputum smears were positive. | Positive | Positive | NA | Positive | NA | Primary treatment | Confirmed active case |
| 41 | Lung shadow for 1 month | Lung CT showed that high-density patches could be seen in both lungs, and there was a high possibility of pulmonary tuberculosis | One sputum smears were positive. | Positive | Positive | NA | NA | NA | Primary treatment | Confirmed active case |
| 42 | Chest tightness and shortness of breath for 1 day | Pulmonary CT showed patchy and nodular fuzzy high-density shadows in both lungs. Pulmonary tuberculosis is considered | Two sputum smears were positive. | Positive | Positive | NA | NA | NA | Primary treatment | Confirmed active case |
| 43 | Fatigue and poor appetite for half a month | Lung CT showed scattered small patchy fuzzy shadows in both lungs | Two sputum smears were positive. | Positive | NA | NA | NA | NA | Primary treatment | Confirmed active case |
| 44 | Fatigue for 2 months | Lung CT showed spots and striped high-density shadows in both lungs | Three sputum smears were positive. | Positive | Positive | NA | Negative | NA | Primary treatment | Confirmed active case |
| 45 | Cough and expectoration for more than two weeks | Lung CT showed pulmonary tuberculosis with shadow of left upper pulmonary cavity | Negative | NA | Positive | NA | NA | NA | Retreatment | Confirmed active case |
| 46 | Cough and expectoration for more than two weeks | Lung CT showed pulmonary tuberculosis with infection | Negative | Negative | Positive | NA | NA | NA | Retreatment | Confirmed active case |
| 47 | Cough and expectoration for more than two weeks | Pulmonary CT showed pulmonary tuberculosis with cavity shadow | Two sputum smears were positive. | Positive | Positive | NA | NA | NA | Primary treatment | Confirmed active case |
| 48 | Cough and expectoration for more than two weeks | Lung CT showed nodules, patchy and ground glass density increasing shadows in both lungs, | NA | Positive | Positive | NA | NA | NA | Primary treatment | Confirmed active case |
| 49 | Chest tightness and shortness of breath for 3 years | Lung CT showed that pulmonary tuberculosis was considered | One sputum smears were positive. | Positive | Positive | NA | NA | Non drug resistance | Primary treatment | Confirmed active case |
| 50 | Cough, expectoration and hemoptysis for more than 2 months | Lung CT showed multiple exudative shadows in the dorsal segment of the upper and lower lobes of the right lung | Three sputum smears were positive. | Positive | Positive | NA | NA | Non drug resistance | Primary treatment | Confirmed active case |
| 51 | Cough and expectoration for more than two weeks | Lung CT showed cavitary shadow in the upper left lung and diffuse chestnut nodule shadow in both lungs | Two sputum smears were positive. | NA | Positive | NA | NA | Non drug resistance | Primary treatment | Confirmed active case |
| 52 | Cough for 1 year and hemoptysis for 2 days | Lung CT showed patchy high-density shadows with irregular cavities in both lungs | One sputum smears were positive. | Positive | Positive | NA | Positive | Non drug resistance | Primary treatment | Confirmed active case |
| 53 | Cough and expectoration for 3 weeks | Lung CT showed right pulmonary tuberculosis | Negative | Negative | Positive | NA | NA | Non drug resistance | Retreatment | Confirmed active case |
| 54 | Abdominal pain for 10 days | Lung CT showed pulmonary tuberculosis with cavity shadow | One sputum smears were positive. | Positive | Positive | NA | NA | Non drug resistance | Primary treatment | Confirmed active case |
| 55 | Lung shadow for 4 months | Lung CT shows that it may be cancer | Three sputum smears were positive. | Negative | Positive | Pathology showed that tuberculosis DNA was positive | NA | Non drug resistance | Primary treatment | Confirmed active case |
| 56 | Cough, expectoration and hemoptysis for 1 month | Lung CT showed nodules and patchy shadows in the lower lobe of the right lung | Three sputum smears were positive. | Negative | Positive | NA | Negative | Non drug resistance | Primary treatment | Confirmed active case |
| 57 | Cough and expectoration for more than two weeks | Lung CT showed multiple nodules in both lungs | One sputum smears were positive. | Positive | Positive | NA | Positive | Non drug resistance | Primary treatment | Confirmed active case |
| 58 | Cough and expectoration for more than two weeks | Lung CT showed patchy shadows on the upper lobe of the left lung | One sputum smears were positive. | Positive | Positive | NA | Positive | Non drug resistance | Primary treatment | Confirmed active case |
| 59 | Cough, chest tightness and shortness of breath for 2 months | Lung CT showed patchy shadows on both upper lungs | Three sputum smears were positive. | Positive | Positive | NA | NA | Non drug resistance | Retreatment | Confirmed active case |
| 60 | Cough and expectoration for more than two weeks | Lung CT showed pulmonary tuberculosis. | Two sputum smears were positive. | Positive | Positive | NA | Positive | Non drug resistance | Primary treatment | Confirmed active case |
| 61 | Cough and expectoration for more than two weeks | Lung CT showed pulmonary tuberculosis. | Negative | Negative | Positive | NA | NA | Non drug resistance | Primary treatment | Confirmed active case |
| 62 | Lumbar pain for 1 week | Lung CT showed pulmonary tuberculosis with cavity shadow | Negative | Positive | Positive | NA | Positive | Non drug resistance | Primary treatment | Confirmed active case |
| 63 | Chest tightness for 1 day | Lung CT shows that it may be pulmonary tuberculosis | Negative | Positive | Positive | NA | Positive | Non drug resistance | Primary treatment | Confirmed active case |
| 64 | Cough and expectoration for 10 days | Lung CT showed patchy high-density shadows in both lower lungs | Negative | Positive | Positive | NA | Positive | Rifampicin, isoniazid | Primary treatment | Confirmed active case |
| 65 | Cough and expectoration for more than two weeks | Lung CT showed pulmonary tuberculosis with cavity shadow | Three sputum smears were positive. | Negative | Positive | NA | NA | Non drug resistance | Retreatment | Confirmed active case |
| 66 | Cough for 1 month | Lung CT showed multiple infections in the left lung | Two sputum smears were positive. | Negative | Positive | NA | Positive | NA | Primary treatment | Confirmed active case |
| 67 | Cough for 20 days | Lung CT shows that it may be pulmonary tuberculosis | Three sputum smears were positive. | Negative | Positive | NA | NA | NA | Primary treatment | Confirmed active case |
| 68 | Cough and expectoration for more than two weeks | Lung CT showed multiple nodules in both lungs | One sputum smears were positive. | Positive | Positive | NA | NA | NA | Primary treatment | Confirmed active case |
| 69 | Cough and expectoration for 3 months | Lung CT showed patchy and cord like high-density shadows in both lungs | One sputum smears were positive. | Positive | Positive | NA | NA | NA | Primary treatment | Confirmed active case |
| 70 | Hemoptysis | Lung CT showed punctate and cord like high-density shadows in both lungs | Negative | Negative | Positive | NA | NA | NA | Retreatment | Confirmed active case |
| 71 | Hemoptysis | Lung CT showed multiple patchy and nodular increased density shadows in both lungs, suggesting the possibility of tuberculosis | Negative | Negative | Positive | NA | Positive | NA | Primary treatment | Confirmed active case |
| 72 | Chest pain for 1 month | Lung CT showed patchy shadows in the middle lobe of the right lung | Three sputum smears were positive. | Positive | Positive | NA | NA | NA | Primary treatment | Confirmed active case |
| 73 | Cough and expectoration for 5 days | Lung CT showed that the upper lobe of the left lung may be pulmonary tuberculosis | Negative | Negative | Positive | NA | NA | NA | Primary treatment | Confirmed active case |
| 74 | Chest pain 1 week | Lung CT showed cavitary changes in the left upper lung and right lower lung | One sputum smears were positive. | Positive | Positive | NA | Positive | Non drug resistance | Primary treatment | Confirmed active case |
| 75 | Cough, expectoration and hemoptysis for 1 month | Lung CT showed nodular shadow, suggesting pulmonary tuberculosis | Negative | Negative | Positive | NA | NA | Non drug resistance | Primary treatment | Confirmed active case |
| 76 | Cough and expectoration for 2 months | Lung CT showed two pulmonary cavities, suggesting pulmonary tuberculosis | One sputum smears were positive. | Positive | Positive | NA | NA | Non drug resistance | Primary treatment | Confirmed active case |
| 77 | Chest tightness and palpitation for 3 days | Lung CT showed pulmonary tuberculosis with cavity shadow | Negative | Negative | Positive | NA | NA | Non drug resistance | Retreatment | Confirmed active case |
| 78 | Cough and expectoration for more than two weeks | Lung CT showed chestnut pulmonary tuberculosis | One sputum smears were positive. | Negative | Positive | NA | NA | Non drug resistance | Primary treatment | Confirmed active case |
| 79 | Cough and expectoration for more than two weeks | Lung CT showed pulmonary tuberculosis. | Negative | Positive | Positive | NA | Positive | Non drug resistance | Primary treatment | Confirmed active case |
| 80 | Lung shadow | Lung CT showed multiple spots and cavities in both lungs | Negative | Negative | Positive | NA | Negative | Non drug resistance | Primary treatment | Confirmed active case |
| 81 | Cough and expectoration for more than two weeks | Lung CT showed leaf patch shadow and posterior wall cavity shadow on the left lung | One sputum smears were positive. | Positive | Positive | NA | NA | Non drug resistance | Primary treatment | Confirmed active case |
| 82 | Cough, expectoration and hemoptysis for 1 week | Pulmonary CT showed tuberculosis in the left upper lobe with cavity shadow | Negative | Negative | Positive | NA | NA | Non drug resistance | Primary treatment | Confirmed active case |
| 83 | Cough and expectoration for more than two weeks | Lung CT showed patchy and nodular shadows in the lower lobe of the right lung | Three sputum smears were positive. | Positive | Positive | NA | NA | Non drug resistance | Primary treatment | Confirmed active case |
| 84 | Cough with fever for 1 month | Lung CT showed irregular nodules in the right lung | Negative | NA | Positive | NA | NA | Non drug resistance | Primary treatment | Confirmed active case |
| 85 | Cough and expectoration for more than two weeks | Lung CT showed irregular patches and bands of both lungs, which were considered as pulmonary tuberculosis | Negative | Positive | Positive | NA | NA | Non drug resistance | Primary treatment | Confirmed active case |
| 86 | Cough, expectoration and fever for 10 days | Lung CT showed patchy and cavitary shadows in the right lower lung | Negative | Positive | Positive | NA | NA | Non drug resistance | Primary treatment | Confirmed active case |
| 87 | Cough, expectoration and fever for 5 months | Lung CT showed cavitary shadow in the upper left lung | One sputum smears were positive. | NA | Positive | NA | NA | Non drug resistance | Primary treatment | Confirmed active case |
| 88 | Fever for 1 month | Lung CT showed right pulmonary tuberculosis | Negative | Negative | Positive | NA | NA | Non drug resistance | Primary treatment | Confirmed active case |
| 89 | Fever for 2 days | Lung CT showed multiple small nodules in both lungs | Negative | Negative | Positive | NA | NA | Non drug resistance | Primary treatment | Confirmed active case |
| 90 | Lung shadow | Lung CT showed multiple nodules in the right lung | Three sputum smears were positive. | Positive | Positive | NA | NA | Non drug resistance | Primary treatment | Confirmed active case |
| 91 | Cough and expectoration for more than two weeks | Lung CT showed multiple patches, consolidation and cavity shadows in both lungs | Negative | Positive | Positive | NA | Positive | Non drug resistance | Primary treatment | Confirmed active case |
| 92 | fever | Lung CT showed pulmonary tuberculosis. | One sputum smears were positive. | Positive | Positive | NA | Positive | Non drug resistance | Primary treatment | Confirmed active case |
| 93 | Cough | Lung CT showed infectious lesions in both lungs | Three sputum smears were positive. | Positive | Positive | NA | NA | Non drug resistance | Primary treatment | Confirmed active case |
| 94 | Lung shadow | Lung CT showed patchy, nodular and cavitary shadows in both lungs | Negative | Positive | Positive | NA | NA | Non drug resistance | Primary treatment | Confirmed active case |
| 95 | Cough and expectoration for more than two weeks | Lung CT showed pulmonary tuberculosis. | Negative | Negative | Positive | NA | NA | Non drug resistance | Primary treatment | Confirmed active case |
| 96 | Chest tightness and chest pain | Lung CT showed diffuse chestnut granular and patchy shadows in both lungs | Negative | Negative | Positive | NA | NA | Non drug resistance | Primary treatment | Confirmed active case |
| 97 | Cough and expectoration for more than two weeks | Lung CT showed a cavitary shadow in the left lower lung | Two sputum smears were positive. | Positive | Positive | NA | Positive | Non drug resistance | Primary treatment | Confirmed active case |
| 98 | Lung shadow | Lung CT showed two lung lesions with cavity shadow | Negative | Positive | Positive | NA | NA | Non drug resistance | Primary treatment | Confirmed active case |
| 99 | Cough and expectoration for more than two weeks | Lung CT showed two lung lesions with cavity shadow | One sputum smears were positive. | Positive | Positive | NA | NA | Non drug resistance | Primary treatment | Confirmed active case |
| 100 | Cough and expectoration for 10 days | Lung CT showed multiple patchy nodules in both lungs and cavity shadow in the upper right lung | Two sputum smears were positive. | Positive | Positive | NA | NA | Non drug resistance | Primary treatment | Confirmed active case |
| 101 | Cough and expectoration for 6 days | Lung CT showed diffuse lesions in both lungs | One sputum smears were positive. | Positive | Positive | NA | NA | Non drug resistance | Primary treatment | Confirmed active case |
| 102 | Cough and expectoration for more than two weeks | Lung CT showed patchy shadows on both upper lungs | One sputum smears were positive. | Positive | Positive | NA | Negative | Non drug resistance | Primary treatment | Confirmed active case |
| 103 | Cough and expectoration for more than two weeks | Lung CT showed high-density mass in the right lower lobe with cavity formation | NA | NA | Positive | NA | NA | Non drug resistance | Primary treatment | Confirmed active case |
| 104 | Cough and expectoration for 1 year | Lung CT showed scattered speckled and small patchy high-density shadows in both lungs | Negative | Positive | Positive | NA | Positive | Non drug resistance | Primary treatment | Confirmed active case |
| 105 | Cough and expectoration for 3 months | Lung CT showed patchy shadow on the right upper lung | Three sputum smears were positive. | Negative | Positive | NA | NA | Non drug resistance | Primary treatment | Confirmed active case |
| 106 | Cough and expectoration for 1 month | Lung CT showed partial destruction with patchy nodular shadow of the right upper lung | One sputum smears were positive. | Positive | Positive | NA | NA | Non drug resistance | Primary treatment | Confirmed active case |
| 107 | Cough and expectoration for 2 years | Lung CT showed diffuse lesions in both lungs and considered pulmonary tuberculosis with cavity shadow | One sputum smears were positive. | Positive | Positive | NA | NA | Non drug resistance | Primary treatment | Confirmed active case |
| 108 | Cough and expectoration for 3 months | Lung CT showed scattered patches and nodular shadows on both lungs | One sputum smears were positive. | Positive | Positive | NA | NA | Non drug resistance | Primary treatment | Confirmed active case |
| 109 | Cough and expectoration for 3 months | Lung CT showed increased density of speckles and small nodules in the right upper lung and left lung | Three sputum smears were positive. | Positive | Positive | NA | NA | Non drug resistance | Primary treatment | Confirmed active case |
| 110 | Cough, expectoration and fever for 10 months | Lung CT showed pulmonary tuberculosis. | Three sputum smears were positive. | Positive | Positive | NA | NA | Non drug resistance | Primary treatment | Confirmed active case |
| 111 | Chest pain and fever for 10 days | Lung CT shows that it may be tuberculosis of the left lung | Negative | Negative | Positive | NA | NA | NA | Primary treatment | Confirmed active case |
| 112 | Cough for half a month | Lung CT showed lung shadow | One sputum smears were positive. | Positive | Positive | NA | NA | NA | Primary treatment | Confirmed active case |
| 113 | Cough and expectoration for more than 6 months | Lung CT showed multiple lesions in both lungs | Two sputum smears were positive. | Positive | Positive | NA | Positive | Non drug resistance | Primary treatment | Confirmed active case |
| 114 | Cough and expectoration for 1 month | Lung CT showed diffuse nodules in both lungs and considered pulmonary tuberculosis | Negative | Negative | Positive | NA | NA | Non drug resistance | Retreatment | Confirmed active case |
| 115 | Cough and expectoration for 1 year | Pulmonary CT showed tuberculosis in both lungs | NA | Positive | Positive | NA | NA | Non drug resistance | Primary treatment | Confirmed active case |
| 116 | Cough and expectoration for 6 days | Lung CT showed nodular focus with small cavity shadow at the left lung tip | Negative | Negative | Positive | NA | Positive | Non drug resistance | Primary treatment | Confirmed active case |
| 117 | Fever and cough for 3 days | Lung CT showed multiple patchy high-density shadows in the upper lobes of both lungs and the middle lobe of the right lung, and cavity shadows in the upper lobe of the right lung | Two sputum smears were positive. | Positive | Positive | NA | Positive | Non drug resistance | Primary treatment | Confirmed active case |
| 118 | Fever for 1 week | Lung CT showed diffuse chestnut like nodules in both lungs, suggesting pulmonary tuberculosis | Negative | Positive | Positive | NA | Positive | Non drug resistance | Primary treatment | Confirmed active case |
| 119 | Fever for 10 days | Lung CT shows diffuse lesions in both lungs, which is likely to be pulmonary tuberculosis | One sputum smears were positive. | NA | Positive | NA | NA | Non drug resistance | Primary treatment | Confirmed active case |
| 120 | 咳嗽咳痰2月 | Lung CT showed patchy, nodular and cord like shadows on both upper lungs | One sputum smears were positive. | Positive | Positive | NA | Positive | Non drug resistance | Primary treatment | Confirmed active case |
| 121 | Cough and hemoptysis for 1 month | Lung CT showed tuberculosis with cavity shadow in the right lung | Three sputum smears were positive. | Positive | Positive | NA | Positive | Non drug resistance | Primary treatment | Confirmed active case |
| 122 | Cough and expectoration for more than two weeks | Lung CT showed infectious lesions in both lungs, which may be pulmonary tuberculosis | Negative | Positive | Positive | NA | Positive | Non drug resistance | Primary treatment | Confirmed active case |
| 123 | Cough and expectoration for 4 months | Lung CT showed multiple patchy and cavitary shadows in both lungs | Two sputum smears were positive. | Positive | Positive | NA | Positive | Non drug resistance | Primary treatment | Confirmed active case |
| 124 | Cough and expectoration for 2 months | Lung CT showed that pulmonary tuberculosis may be considered | Negative | Negative | Positive | NA | Positive | Non drug resistance | Primary treatment | Confirmed active case |
| 125 | Cough with blood in sputum for 1 week | Lung CT showed that there was a high possibility of tuberculosis in multiple lesions of both lungs | Negative | Positive | Positive | NA | NA | Non drug resistance | Primary treatment | Confirmed active case |
| 126 | Repeated fever for 9 days | Lung CT showed infectious lesions in the left lung, which may be pulmonary tuberculosis | Negative | Positive | Positive | NA | NA | Non drug resistance | Primary treatment | Confirmed active case |
| 127 | Cough and expectoration for 3 months | Lung CT showed cavity shadow in the right lower lung | Three sputum smears were positive. | Positive | Positive | NA | NA | Non drug resistance | Primary treatment | Confirmed active case |
| 128 | Cough and expectoration for 1 month | Lung CT showed infectious lesions in both lungs, which may be pulmonary tuberculosis | Negative | Negative | Positive | NA | Positive | Non drug resistance | Primary treatment | Confirmed active case |
| 129 | Cough and expectoration for 3 weeks | Lung CT showed infectious lesions in the right lower lobe, which was considered to be pulmonary tuberculosis | Negative | Negative | Positive | NA | NA | Non drug resistance | Primary treatment | Confirmed active case |
| 130 | Cough and expectoration for 10 days | Lung CT showed old pulmonary tuberculosis in both upper lungs | One sputum smears were positive. | Positive | Positive | NA | NA | Non drug resistance | Primary treatment | Confirmed active case |
| 131 | Cough and expectoration for 20 days | Lung CT showed patchy and nodular shadows in the left lung | One sputum smears were positive. | Positive | Positive | NA | NA | Non drug resistance | Primary treatment | Confirmed active case |
| 132 | Abdominal pain and vomiting | Lung CT showed multiple infectious lesions in both lungs with the formation of large cavities in the right lung tip | Negative | Positive | Positive | NA | NA | Non drug resistance | Primary treatment | Confirmed active case |
| 133 | Cough and expectoration for 11 months | Lung CT showed pulmonary tuberculosis. | Negative | Positive | Positive | NA | Positive | Non drug resistance | Primary treatment | Confirmed active case |
| 134 | Cough, expectoration for 5 years, fever for 1 month | Lung CT showed pulmonary tuberculosis. | Negative | NA | Positive | NA | NA | Non drug resistance | Primary treatment | Confirmed active case |
| 135 | Cough and expectoration for 2 weeks | NA | One sputum smears were positive. | Positive | Positive | NA | NA | Non drug resistance | Primary treatment | Confirmed active case |
| 136 | Cough and hemoptysis for 2 months | Lung CT showed tuberculosis in the right middle lobe with cavity formation | One sputum smears were positive. | Negative | Positive | NA | NA | NA | Retreatment | Confirmed active case |
| 137 | Recurrent wheezing | Lung CT showed nodular and cord like and patchy shadows at the tip of the lung | One sputum smears were positive. | Positive | Positive | NA | Positive | Non drug resistance | Primary treatment | Confirmed active case |
| 138 | Cough and expectoration for 1 week | Lung CT showed that tuberculosis may be in the upper left lobe | Negative | Positive | Positive | NA | Positive | Non drug resistance | Primary treatment | Confirmed active case |
| 139 | Cough and expectoration for 30 years and hemoptysis for 20 days | Lung CT showed two lung infections, suggesting the possibility of pulmonary tuberculosis | Negative | Positive | Positive | NA | NA | Non drug resistance | Primary treatment | Confirmed active case |
| 140 | Cough for more than 1 month | Lung CT showed scattered spots, tiny nodules and cord shadows in both lungs | Negative | Positive | Positive | NA | NA | Non drug resistance | Primary treatment | Confirmed active case |
| 141 | Lung shadow | Lung CT showed spotted and patchy high-density shadows in both lungs and a hollow nodule in the upper lobe of the right lung | One sputum smears were positive. | Positive | Positive | NA | Positive | Non drug resistance | Primary treatment | Confirmed active case |
| 142 | Cough and expectoration for 5 months | Lung CT showed infectious lesions in the left lung, which may be pulmonary tuberculosis | Negative | Positive | Positive | NA | NA | Non drug resistance | Primary treatment | Confirmed active case |
| 143 | Cough and expectoration for more than 1 month | Lung CT showed tuberculosis with cavities in both lungs | Two sputum smears were positive. | Positive | Positive | NA | Positive | Non drug resistance | Primary treatment | Confirmed active case |
| 144 | Cough and expectoration for 2 months | Lung CT showed infectious lesions of the right lung with small cavities | Negative | Negative | Positive | NA | Positive | Non drug resistance | Primary treatment | Confirmed active case |
| 145 | Chest tightness and cough for 1 week | Lung CT showed extensive and multiple patchy, nodular and cavitary shadows in both lungs | Two sputum smears were positive. | Positive | Positive | NA | NA | Non drug resistance | Primary treatment | Confirmed active case |
| 146 | Cough and expectoration for 7 months | Lung CT showed ground glass shadow of both lungs | Negative | Negative | Positive | NA | NA | Non drug resistance | Primary treatment | Confirmed active case |
| 147 | Chest tightness and shortness of breath for 1 month | Lung CT showed patchy and fuzzy high-density shadows of both lungs | One sputum smears were positive. | Positive | Positive | NA | Positive | Streptomycin | Primary treatment | Confirmed active case |
| 148 | Cough for 3 weeks and hemoptysis for 2 weeks | Lung CT showed patches and lumpy increased density shadows in the upper, middle and lower parts of the left lung | One sputum smears were positive. | Positive | NA | NA | NA | NA | Primary treatment | Confirmed active case |
| 149 | Cough for 4 months | Lung CT showed multiple chestnut nodules in the left lung | One sputum smears were positive. | Positive | Positive | NA | Positive | Non drug resistance | Primary treatment | Confirmed active case |
| 150 | Cough and hemoptysis for 7 months | Lung CT showed new patchy and nodular shadows in the left lower lung | Negative | Positive | Positive | NA | Positive | Non drug resistance | Primary treatment | Confirmed active case |
| 151 | Hemoptysis | Lung CT showed pulmonary tuberculosis in both lungs | One sputum smears were positive. | Positive | Positive | NA | Positive | Non drug resistance | Retreatment | Confirmed active case |
| 152 | Cough and expectoration for 3 months | Lung CT showed pulmonary tuberculosis in both lungs | Negative | Positive | Positive | NA | NA | Non drug resistance | Primary treatment | Confirmed active case |
| 153 | Cough for 2 months | Lung CT shows that pulmonary tuberculosis may be in the left lung | One sputum smears were positive. | Positive | Positive | NA | NA | Non drug resistance | Primary treatment | Confirmed active case |
| 154 | Cough with fatigue for more than 2 months | Pulmonary CT showed pulmonary tuberculosis | One sputum smears were positive. | Positive | Positive | NA | Positive | Non drug resistance | Primary treatment | Confirmed active case |
| 155 | Cough and expectoration for 1 month | Pulmonary CT showed pulmonary tuberculosis in the left lung | Negative | Negative | Negative | Pathology showed pulmonary tuberculosis | NA | Non drug resistance | Primary treatment | Confirmed active case |
| 156 | Chest pain 4 months | Lung CT showed patchy shadows on both lungs | Negative | NA | Positive | NA | NA | Non drug resistance | Primary treatment | Confirmed active case |
| 157 | Cough and expectoration for 1 day | Lung CT showed patchy and nodular high-density shadows on both lungs | Negative | Positive | Positive | NA | Positive | Non drug resistance | Primary treatment | Confirmed active case |
| 158 | Cough and shortness of breath for 1 month | Lung CT showed tuberculosis in both lungs | Negative | Negative | Positive | NA | NA | Non drug resistance | Primary treatment | Confirmed active case |
| 159 | Cough for 20 days | Lung CT showed patchy and cavitary shadows in both lungs | One sputum smears were positive. | Positive | Positive | NA | NA | Non drug resistance | Retreatment | Confirmed active case |
| 160 | Cough and expectoration for 1 month | Lung CT showed fibrous proliferation and calcification in the upper lobe of the right lung | One sputum smears were positive. | Positive | Positive | NA | Positive | Non drug resistance | Primary treatment | Confirmed active case |
| 161 | Chest tightness and fever for 3 weeks | Lung CT showed pulmonary tuberculosis in both lungs | Negative | Negative | Positive | NA | NA | NA | Primary treatment | Confirmed active case |
| 162 | Cough and fever for more than 1 month | Lung CT showed infectious lesions in both lungs, which may be pulmonary tuberculosis | One sputum smears were positive. | Positive | Positive | NA | Positive | Non drug resistance | Primary treatment | Confirmed active case |
| 163 | Cough for 3 months | Lung CT showed scattered nodules in both lungs and thin-walled cavities in the lower right lung | Negative | Positive | Positive | NA | Negative | Rifampicin | Retreatment | Confirmed active case |
| 164 | Cough and expectoration for 1 month | Lung CT showed scattered chestnut nodules in both lungs | One sputum smears were positive. | Positive | Positive | NA | NA | Non drug resistance | Primary treatment | Confirmed active case |
| 165 | Cough and expectoration for 3 weeks and fever for 2 weeks | Lung CT showed right upper mediastinal space occupying lesion | Negative | Negative | Negative | The X-Pert of the tissue is positive | NA | Non drug resistance | Primary treatment | Confirmed active case |
| 166 | Cough and expectoration for more than half a year | Lung CT showed chronic infection of both lungs with scattered proliferative foci | One sputum smears were positive. | Positive | Positive | NA | Positive | Non drug resistance | Primary treatment | Confirmed active case |
| 167 | Chest pain, cough and expectoration for 20 days | Lung CT showed a patchy shadow in the right upper lung | Negative | Positive | Positive | NA | Positive | Non drug resistance | Primary treatment | Confirmed active case |
| 168 | Cough, expectoration and fever for more than 20 days | Pulmonary CT showed pulmonary tuberculosis in both lungs | Negative | Negative | Positive | NA | NA | Non drug resistance | Primary treatment | Confirmed active case |
| 169 | Cough and expectoration for 3 months | Pulmonary CT shows infectious lesions, pulmonary tuberculosis is the first consideration | Negative | Positive | Positive | NA | NA | Non drug resistance | Retreatment | Confirmed active case |
| 170 | Lung shadow | Pulmonary CT showed pulmonary tuberculosis in both lungs | Negative | Negative | Positive | NA | NA | NA | Primary treatment | Confirmed active case |
| 171 | Cough and expectoration for half a year | Lung CT showed a large consolidation shadow in the left upper lung and scattered patchy and nodular shadows in both lungs | Three sputum smears were positive. | NA | NA | NA | Positive | Non drug resistance | Primary treatment | Confirmed active case |
| 172 | Cough and expectoration for 3 months | Lung CT showed that it may be invasive pulmonary tuberculosis in the upper lobe of the right lung | One sputum smears were positive. | Positive | Positive | NA | NA | Non drug resistance | Primary treatment | Confirmed active case |
| 173 | Cough and expectoration for 1 month | Lung CT showed pulmonary tuberculosis in both lungs | Negative | Positive | Positive | NA | Positive | Non drug resistance | Primary treatment | Confirmed active case |
| 174 | Lung shadow | Lung CT shows that pulmonary tuberculosis may be in the right lung | Negative | Negative | Positive | NA | Positive | Non drug resistance | Primary treatment | Confirmed active case |
| 175 | Cough for 9 months | Lung CT showed tuberculosis in the right upper lung | Negative | Negative | Positive | Right pleural nodule puncture indicates tuberculosis | NA | Non drug resistance | Retreatment | Confirmed active case |
| 176 | Cough and expectoration for 20 days | Lung CT showed two pneumonic lesions, considering the possibility of pulmonary tuberculosis | Negative | Positive | Positive | NA | Positive | Non drug resistance | Primary treatment | Confirmed active case |
| 177 | Cough and expectoration 1 year hemoptysis 1 week | Lung CT showed tuberculosis in the left lung | One sputum smears were positive. | Positive | Positive | NA | Positive | Non drug resistance | Primary treatment | Confirmed active case |
| 178 | Cough for half a month and fever for 3 days | Lung CT showed the formation of cavity in the upper lobe of the right lung, which may be pulmonary tuberculosis | One sputum smears were positive. | NA | Positive | NA | NA | Non drug resistance | Primary treatment | Confirmed active case |
| 179 | Cough for 1 month | Lung CT showed a few ground glass nodules in both lungs, and tuberculosis was to be discharged | Negative | Positive | Positive | NA | NA | Non drug resistance | Primary treatment | Confirmed active case |
| 180 | Cough, sputum and blood for more than 10 days | Lung CT showed patchy increased density shadow in the right upper lung | Negative | Positive | Positive | NA | Positive | Non drug resistance | Primary treatment | Confirmed active case |
| 181 | Cough, expectoration and fever for 1 month | Lung CT showed patchy shadows of both lungs | NA | Negative | Positive | NA | NA | Non drug resistance | Primary treatment | Confirmed active case |
| 182 | Cough and expectoration for 2 months and fever for 4 days | Lung CT showed the formation of cavity in the upper lobe of the left lung | Negative | Positive | Positive | NA | Negative | Non drug resistance | Primary treatment | Confirmed active case |
| 183 | Cough and expectoration for half a year | Lung CT shows two lung infections, which may be tuberculosis | Negative | Positive | Positive | NA | NA | Non drug resistance | Primary treatment | Confirmed active case |
| 184 | Cough for 2 months | Pulmonary CT showed pulmonary tuberculosis in the upper left | One sputum smears were positive. | Positive | Positive | NA | Positive | Non drug resistance | Primary treatment | Confirmed active case |
| 185 | Cough and expectoration for 1 month | Lung CT showed spotted high-density shadows in both lungs | Negative | Negative | Positive | Pathology suggests tuberculosis | NA | Non drug resistance | Primary treatment | Confirmed active case |
| 186 | Cough and expectoration for 1 week | Lung CT showed multiple nodules in both lungs | Three sputum smears were positive. | NA | NA | NA | NA | NA | Primary treatment | Confirmed active case |
| 187 | Cough and expectoration for 3 months | Lung CT showed infection in the lower lobe of the right lung. It may be pulmonary tuberculosis | One sputum smears were positive. | Positive | Positive | NA | Positive | Non drug resistance | Primary treatment | Confirmed active case |
| 188 | Fever for half a month | Lung CT showed diffuse lesions in both lungs, considering tuberculosis infection | Negative | Negative | Positive | NA | NA | Non drug resistance | Primary treatment | Confirmed active case |
| 189 | Cough, expectoration for 4 months, hemoptysis for 1 month | Lung CT showed pulmonary tuberculosis in both lungs | Two sputum smears were positive. | Positive | Positive | NA | NA | Non drug resistance | Retreatment | Confirmed active case |
| 190 | Cough and expectoration for 2 months | Lung CT showed multiple patches and spots with cavities in both lungs, which may be pulmonary tuberculosis | One sputum smears were positive. | Positive | Positive | NA | NA | Non drug resistance | Primary treatment | Confirmed active case |
| 191 | Cough and expectoration for half a year | Lung CT shows that it may be pulmonary tuberculosis | One sputum smears were positive. | Positive | Positive | NA | NA | Non drug resistance | Primary treatment | Confirmed active case |
| 192 | Cough and expectoration for 5 years | Lung CT showed scattered patchy and punctate high-density shadows in both lungs | Negative | Negative | Positive | NA | NA | Isoniazid | Primary treatment | Confirmed active case |
| 193 | Cough and expectoration for 3 months | Lung CT showed multiple spots and exudative shadows in the right lung | One sputum smears were positive. | Positive | Positive | NA | NA | Non drug resistance | Primary treatment | Confirmed active case |
| 194 | Lung shadow | Lung CT showed high-density shadow of spots and stripes, suggesting tuberculosis in both lungs | One sputum smears were positive. | Positive | Positive | NA | Positive | Non drug resistance | Primary treatment | Confirmed active case |
| 195 | Cough and expectoration for more than 10 years | Lung CT showed pulmonary tuberculosis in both lungs | Two sputum smears were positive. | Negative | Positive | NA | NA | Non drug resistance | Retreatment | Confirmed active case |
| 196 | Cough and expectoration for 9 years | NA | Three sputum smears were positive. | Positive | Positive | NA | NA | Non drug resistance | Primary treatment | Confirmed active case |
| 197 | Cough and expectoration for 2 months | Lung CT showed that it may be pulmonary tuberculosis in both lung | One sputum smears were positive. | Positive | Positive | NA | NA | Non drug resistance | Primary treatment | Confirmed active case |
| 198 | Hemoptysis | Lung CT showed multiple infections in both lungs, and the formation of partial cavities in the lesions suggested tuberculosis in both lungs | One sputum smears were positive. | Positive | Positive | NA | NA | Non drug resistance | Primary treatment | Confirmed active case |
| 199 | Cough, expectoration, fever and shortness of breath for a week | Lung CT showed scattered flake high-density shadows in both lungs | Negative | Positive | Positive | NA | NA | Non drug resistance | Primary treatment | Confirmed active case |
| 200 | Cough and expectoration for 2 months | Lung CT showed patchy shadow with cavity formation in the right lung | Two sputum smears were positive. | Positive | Positive | NA | NA | Non drug resistance | Primary treatment | Confirmed active case |
| 201 | Cough and expectoration for 1 month | Lung CT showed pulmonary tuberculosis in both lungs | Negative | Negative | Positive | NA | NA | Non drug resistance | Retreatment | Confirmed active case |
| 202 | Lung shadow for half a year | Lung CT showed a speckled nodular density increase shadow on the right upper lung | Negative | Negative | Positive | NA | Positive | Non drug resistance | Primary treatment | Confirmed active case |
| 203 | Cough for half a month | Lung CT showed irregular patches and cord like shadows on both lungs | One sputum smears were positive. | Positive | Positive | NA | NA | Non drug resistance | Primary treatment | Confirmed active case |
| 204 | Cough and expectoration for seven months | Lung CT showed scattered infectious lesions in the left upper lung and small nodules in the left lower lobe | One sputum smears were positive. | Positive | Positive | NA | Positive | Non drug resistance | Primary treatment | Confirmed active case |
| 205 | Cough and expectoration for more than 4 months | Lung CT showed plaques and patchy shadows in the anterior segment of the upper lobe of the right lung | Negative | Negative | Positive | NA | Negative | Non drug resistance | Primary treatment | Confirmed active case |
| 206 | Cough and expectoration for 2 months | Lung CT showed multiple spots and exudative shadows in both lungs and multiple cavities in both lungs | Three sputum smears were positive. | Positive | Positive | NA | NA | Non drug resistance | Primary treatment | Confirmed active case |
| 207 | Cough and expectoration for 1 month | Lung CT showed that tuberculosis was considered in both lungs | Negative | Positive | Positive | NA | Negative | Non drug resistance | Primary treatment | Confirmed active case |
| 208 | Cough, expectoration and fever for 1 month | Lung CT showed infectious lesions in both lungs | One sputum smears were positive. | Positive | Positive | NA | Positive | Non drug resistance | Primary treatment | Confirmed active case |
| 209 | Cough and expectoration for half a month | Lung CT showed multiple nodules and half cord shadows in both lungs | Negative | Negative | Positive | NA | NA | Non drug resistance | Primary treatment | Confirmed active case |
| 210 | NA | Lung CT showed scattered fibrous cords in both lungs | Negative | Negative | Positive | NA | NA | Non drug resistance | Retreatment | Confirmed active case |
| 211 | Cough and expectoration for 7 years | Lung CT showed patchy shadows of both lungs | Two sputum smears were positive. | Positive | Positive | NA | Negative | Non drug resistance | Retreatment | Confirmed active case |
| 212 | Fatigue and discomfort | Lung CT showed nodular density increase in the upper lobe of the right lung | Negative | Negative | Negative | Tissue X-Pert was positive | NA | Non drug resistance | Primary treatment | Confirmed active case |
| 213 | Cough for 50 days | Lung CT showed a patch of cord shadow on the left upper spot, which may be tuberculosis | Negative | Positive | Positive | NA | Positive | Non drug resistance | Primary treatment | Confirmed active case |
| 214 | Cough and expectoration for 4 months | Lung CT showed mass shadow in the right upper lung | Three sputum smears were positive. | Positive | Positive | Pathology suggests granulomatous inflammation | NA | Non drug resistance | Primary treatment | Confirmed active case |
| 215 | Cough and expectoration for 10 years | Lung CT showed patchy shadows and cavity formation in the upper lobe of the left lung | Negative | Positive | Positive | NA | Positive | Non drug resistance | Primary treatment | Confirmed active case |
| 216 | Asthenia and anorexia | Lung CT showed tuberculosis in both lungs with cavities in the right upper lung | Negative | Negative | Positive | NA | Positive | Non drug resistance | Primary treatment | Confirmed active case |
| 217 | Cough and expectoration for 5 years and fever for 5 days | Lung CT showed tuberculosis in both lungs | One sputum smears were positive. | Positive | NA | NA | NA | Non drug resistance | Primary treatment | Confirmed active case |
| 218 | Cough and expectoration for 1 month | Lung CT showed patchy nodular shadow of the right lung, which may be tuberculosis of the right lung | One sputum smears were positive. | Negative | Positive | NA | NA | Non drug resistance | Primary treatment | Confirmed active case |
| 219 | Cough and expectoration for 3 months | Lung CT showed tuberculosis in both lungs | Negative | Positive | Positive | NA | NA | Non drug resistance | Primary treatment | Confirmed active case |
| 220 | Cough and expectoration for 2 months | Lung CT showed scattered exudative lesions in the upper, middle and lower parts of the left lung and a few spots and strips in the upper right lung | One sputum smears were positive. | Positive | Positive | NA | NA | Non drug resistance | Primary treatment | Confirmed active case |
| 221 | Fever for half a month | Lung CT showed infection in the upper lobe of the right lung, suggesting that it may be tuberculosis | One sputum smears were positive. | Positive | Positive | NA | Negative | Streptomycin | Primary treatment | Confirmed active case |
| 222 | Cough and expectoration for 20 days | Lung CT showed infectious lesions in the left lung | Negative | Negative | Positive | NA | Positive | Non drug resistance | Primary treatment | Confirmed active case |
| 223 | Cough and expectoration for more than 6 years | Lung CT showed extensive patches and punctate increased density shadow with cavity formation in both lungs | One sputum smears were positive. | Positive | Positive | NA | NA | Non drug resistance | Retreatment | Confirmed active case |
| 224 | Fever for 1 month | Lung CT showed tuberculosis in both lungs | Negative | Positive | Positive | NA | NA | Non drug resistance | Retreatment | Confirmed active case |
| 225 | Cough and expectoration for 5 days | Lung CT showed a patchy shadow in the right lung | One sputum smears were positive. | Positive | Positive | NA | NA | Non drug resistance | Primary treatment | Confirmed active case |
| 226 | Cough and expectoration for 2 months and fever for 2 weeks | Lung CT showed extensive tuberculosis in both lungs | Negative | Positive | Positive | NA | NA | Non drug resistance | Primary treatment | Confirmed active case |
| 227 | Cough and fever for 10 days | Lung CT showed that pulmonary tuberculosis may recur and nodular shadow in the lower right lung | Negative | Positive | Positive | NA | NA | Streptomycin, rifampicin, isoniazid, ethambutol | Primary treatment | Confirmed active case |
| 228 | Cough and expectoration for 20 days | Lung CT showed tuberculosis in the right lung | Three sputum smears were positive. | Negative | Negative | NA | NA | NA | Primary treatment | Confirmed active case |
| 229 | Lung shadow for 2 months | Lung CT shows that it may be pulmonary tuberculosis | Negative | Positive | Positive | NA | Positive | Non drug resistance | Primary treatment | Confirmed active case |
| 230 | Cough and expectoration for 3 months | Lung CT showed patches and strips of high-density shadow in both lungs, and cavity formation in the right upper lung | Three sputum smears were positive. | Positive | Positive | NA | NA | Non drug resistance | Primary treatment | Confirmed active case |
| 231 | Lung shadow | Lung CT showed tuberculosis in both lungs | Negative | Positive | Positive | NA | NA | Non drug resistance | Primary treatment | Confirmed active case |
| 232 | Cough and expectoration for 3 months | Lung CT showed tuberculosis in both lungs | One sputum smears were positive. | Positive | Positive | NA | Positive | Non drug resistance | Primary treatment | Confirmed active case |
| 233 | Fatigue and anorexia for 3 months | Lung CT showed that it may be pulmonary tuberculosis in both lungs | Negative | Positive | Negative | NA | NA | Non drug resistance | Primary treatment | Confirmed active case |
| 234 | Cough and expectoration for 3 months | Lung CT showed tuberculosis of both lungs with left upper pulmonary cavity | One sputum smears were positive. | Positive | Positive | NA | NA | Non drug resistance | Primary treatment | Confirmed active case |
| 235 | Cough and expectoration for 2 years | Pulmonary CT showed tuberculosis in both lungs with small cavity in the upper right and cavity in the upper left | Three sputum smears were positive. | Positive | Negative | NA | NA | Non drug resistance | Primary treatment | Confirmed active case |
| 236 | Lung shadow | Lung CT showed small ground glass nodules in the left upper lung | Negative | Negative | Positive | NA | NA | Non drug resistance | Primary treatment | Confirmed active case |
| 237 | Cough and expectoration for 1 week | Lung CT showed a patchy shadow on the left upper lung and a small amount of patchy shadow on the right lower lung | Negative | Positive | Positive | NA | Positive | Non drug resistance | Primary treatment | Confirmed active case |
| 238 | Cough and fever for 20 days | Pulmonary CT showed tuberculosis in both lungs with multiple cavities in the right lung | Negative | Positive | Negative | NA | NA | Non drug resistance | Primary treatment | Confirmed active case |
| 239 | Cough and expectoration for 1 month | Lung CT shows that it may be tuberculosis of both lungs | One sputum smears were positive. | Positive | Positive | NA | NA | Non drug resistance | Primary treatment | Confirmed active case |
| 240 | Fatigue and cough for 4 months | Lung CT showed bronchial occlusion in the middle lobe of the right lung and atelectasis in the middle lobe of the right lung | Negative | Negative | Positive | NA | NA | Non drug resistance | Primary treatment | Confirmed active case |
| 241 | Cough and expectoration for 9 months | Lung CT showed patches and spots of the left upper lung | Negative | Negative | Positive | NA | Positive | Non drug resistance | Primary treatment | Confirmed active case |
| 242 | Abnormal liver function | Lung CT showed mass shadow and cavity shadow in the right upper lung | Two sputum smears were positive. | Negative | Positive | NA | Positive | Non drug resistance | Primary treatment | Confirmed active case |
| 243 | Hoarseness | Lung CT showed patchy shadows of the left upper lung | One sputum smears were positive. | Positive | Positive | NA | Positive | Non drug resistance | Primary treatment | Confirmed active case |
| 244 | Cough and expectoration for 4 years and fever for 5 days | Lung CT showed diffuse coarse reticular shadows in both lungs and ground glass shadows in the lower lobes of both lungs | One sputum smears were positive. | Positive | Positive | NA | NA | Streptomycin | Primary treatment | Confirmed active case |
| 245 | Cough and expectoration for 10 days | Lung CT showed infection in the right lung | One sputum smears were positive. | Negative | Positive | NA | NA | Non drug resistance | Primary treatment | Confirmed active case |
| 246 | Cough and expectoration for 3 months | NA | One sputum smears were positive. | Positive | Positive | NA | NA | Non drug resistance | Primary treatment | Confirmed active case |
| 247 | Cough and expectoration for 3 days | Lung CT showed scattered spots and spots on both lungs | One sputum smears were positive. | Positive | Positive | NA | NA | Non drug resistance | Primary treatment | Confirmed active case |
| 248 | Cough and expectoration for 2 months | Lung CT showed consolidation in the posterior segment of the upper lobe tip and the lower lobe of the right lung | Negative | Positive | Positive | NA | NA | Non drug resistance | Primary treatment | Confirmed active case |
| 249 | Cough and expectoration for 1 month | Lung CT showed tuberculosis in both lungs | NA | NA | Positive | NA | NA | Non drug resistance | Primary treatment | Confirmed active case |
| 250 | Cough and expectoration for 3 months | Pulmonary CT showed secondary pulmonary tuberculosis in both lungs and multiple cavities in the left lung | One sputum smears were positive. | Positive | Positive | NA | NA | Non drug resistance | Retreatment | Confirmed active case |
| 251 | Cough and expectoration for 1 month | Pulmonary CT showed multiple infectious lesions in both lungs, suggesting that it may be pulmonary tuberculosis | NA | Positive | Positive | NA | NA | Non drug resistance | Primary treatment | Confirmed active case |
| 252 | Cough and expectoration for 2 months | Lung CT showed tuberculosis in both lungs | Negative | Positive | Positive | NA | NA | Non drug resistance | Primary treatment | Confirmed active case |
| 253 | Cough and expectoration for 1 month and fever for 1 week | Lung CT showed multiple patchy, nodular high-density shadows and cavity formation in the left lung | One sputum smears were positive. | Negative | Positive | NA | Positive | Non drug resistance | Primary treatment | Confirmed active case |
| 254 | Low fever and cough, expectoration and night sweat for 3 months | Lung CT showed lobar high-density shadows and cavities in the upper left, lower right and upper right | Negative | Negative | Positive | NA | NA | Non drug resistance | Primary treatment | Confirmed active case |
| 255 | Cough and expectoration for 2 months | Lung CT showed infection in the lower right lung, which may be pulmonary tuberculosis | Two sputum smears were positive. | Positive | Positive | NA | NA | Non drug resistance | Retreatment | Confirmed active case |
| 256 | Cough and expectoration for half a year | Lung CT showed infectious lesions in both lungs with cavity formation, which may be pulmonary tuberculosis | One sputum smears were positive. | Positive | Positive | NA | Positive | Non drug resistance | Primary treatment | Confirmed active case |
| 257 | Dizziness for 5 days | Lung CT showed exudation and proliferative lesions in the right upper lung. Tuberculosis should be considered first | One sputum smears were positive. | Positive | Positive | NA | Positive | Non drug resistance | Primary treatment | Confirmed active case |
| 258 | Chest pain for 1 month | Lung CT showed lesions in both upper lungs, considering granulomatous inflammation | Negative | Negative | Positive | NA | Negative | Non drug resistance | Primary treatment | Confirmed active case |
| 259 | Cough and expectoration for 2 months | Lung CT showed that tuberculosis in the upper lobe of the right lung could be consistent | Negative | Positive | Positive | NA | NA | Non drug resistance | Primary treatment | Confirmed active case |
| 260 | Fever, cough and shortness of breath for 1 month | Lung CT showed diffuse chestnut shadows and patches with increased density in both lungs, and cavities in the right lower lung | One sputum smears were positive. | Positive | Positive | NA | Positive | Non drug resistance | Primary treatment | Confirmed active case |
| 261 | Cough and expectoration for 2 months | Lung CT showed multiple lesions in both lungs, suggesting that it is likely to be pulmonary tuberculosis | Negative | Positive | Positive | NA | Positive | Non drug resistance | Primary treatment | Confirmed active case |
| 262 | Cough and expectoration for 2 months | Lung CT showed tuberculosis in the right lung with a cavity in the upper right | Three sputum smears were positive. | Negative | Positive | NA | NA | Non drug resistance | Retreatment | Confirmed active case |
| 263 | Cough and expectoration for 10 days | Lung CT showed tuberculosis in both lungs and the formation of cavities in both lungs | Two sputum smears were positive. | Negative | Positive | NA | NA | Non drug resistance | Primary treatment | Confirmed active case |
| 264 | Cough and expectoration for 8 months | Lung CT showed multiple pleomorphic changes in both lungs | Two sputum smears were positive. | Positive | Positive | NA | Positive | Non drug resistance | Primary treatment | Confirmed active case |
| 265 | Lung shadow | Lung CT shows that the first consideration is pulmonary tuberculosis | Negative | Positive | Positive | NA | Positive | Non drug resistance | Primary treatment | Confirmed active case |
| 266 | Cough and hemoptysis for 1 week | Lung CT showed tuberculosis with multiple cavities in both lungs | One sputum smears were positive. | Positive | Positive | NA | NA | Non drug resistance | Primary treatment | Confirmed active case |
| 267 | Fever for 1 month | Lung CT showed tuberculosis in both lungs | Negative | Negative | Positive | NA | NA | Non drug resistance | Retreatment | Confirmed active case |
| 268 | Cough and expectoration for 1 month | Lung CT showed tuberculosis in both lungs | Negative | Positive | Positive | NA | Positive | Non drug resistance | Primary treatment | Confirmed active case |
| 269 | Lung shadow | Lung CT showed tuberculosis in both lungs | Negative | Positive | Positive | NA | NA | Non drug resistance | Primary treatment | Confirmed active case |
| 270 | Cough for half a month and fever for 1 week | Lung CT showed scattered nodular and patchy high-density shadows in both lungs | One sputum smears were positive. | Positive | Positive | NA | NA | Non drug resistance | Primary treatment | Confirmed active case |
| 271 | Cough and expectoration for 1 month | Lung CT showed exudative lesions in the left upper lung | Three sputum smears were positive. | Positive | Positive | NA | NA | Non drug resistance | Primary treatment | Confirmed active case |
| 272 | Cough and expectoration for 3 months and fever for 10 days | Lung CT showed pulmonary infectious lesions | One sputum smears were positive. | Positive | Positive | NA | Positive | Non drug resistance | Primary treatment | Confirmed active case |
| 273 | Cough for 3 years | Lung CT showed lung shadow | Two sputum smears were positive. | Positive | Positive | NA | NA | Non drug resistance | Primary treatment | Confirmed active case |
| 274 | Cough and expectoration for 1 year and fever for 2 weeks | Lung CT showed scattered strip-shaped, small patchy and nodular high-density shadows in the right lung | One sputum smears were positive. | Positive | Positive | NA | NA | Non drug resistance | Primary treatment | Confirmed active case |
| 275 | Cough and expectoration for 3 months | Lung CT showed that it may be pulmonary tuberculosis in both lungs | Negative | NA | Positive | NA | NA | Non drug resistance | Primary treatment | Confirmed active case |
| 276 | Cough for 4 months | Lung CT showed tuberculosis with cavity formation in both upper lungs | One sputum smears were positive. | Positive | Positive | NA | Positive | Rifampicin, streptomycin, fluoroquinolone | Primary treatment | Confirmed active case |
| 277 | Chest tightness and shortness of breath for 10 days | Lung CT showed extensive tuberculosis in both lungs | Negative | Positive | Positive | NA | NA | Non drug resistance | Primary treatment | Confirmed active case |
| 278 | Cough and expectoration for 1 year | Lung CT showed tuberculosis in both lungs with cavity formation in the upper right | Negative | Negative | Positive | NA | Negative | Non drug resistance | Retreatment | Confirmed active case |
| 279 | Cough and expectoration for 1 month and fever for 2 weeks | Lung CT showed tuberculosis in both lungs | Negative | Positive | Positive | NA | NA | Non drug resistance | Primary treatment | Confirmed active case |
| 280 | Right back mass for 6 months | Lung CT showed old tuberculosis in both lungs | Negative | Positive | Positive | NA | NA | Non drug resistance | Primary treatment | Confirmed active case |
| 281 | Hemoptysis for 1 day | Lung CT showed patches and nodules on both upper lungs | Negative | Positive | Positive | NA | Positive | Non drug resistance | Primary treatment | Confirmed active case |
| 282 | Cough and expectoration for 3 months | Lung CT showed tuberculosis with infection in both lungs | Two sputum smears were positive. | Positive | Positive | NA | NA | Non drug resistance | Primary treatment | Confirmed active case |
| 283 | Cough and expectoration for one and a half months | Lung CT showed scattered inflammation in both lungs | One sputum smears were positive. | Positive | Positive | Pathology showed that acid fast bacilli was positive | Positive | NA | Primary treatment | Confirmed active case |
| 284 | Cough and expectoration for 5 months and fever for 1 week | Lung CT showed that it may be tuberculosis in both lungs | One sputum smears were positive. | Positive | Positive | NA | Positive | Isoniazid | Primary treatment | Confirmed active case |
| 285 | Chest pain for 1 week | Lung CT showed patchy nodules in the right lower lung | Negative | Positive | Positive | NA | Positive | Non drug resistance | Primary treatment | Confirmed active case |
| 286 | Cough and expectoration for 1 month and hemoptysis for 10 days | Lung CT showed a patchy shadow of the right upper lung | One sputum smears were positive. | Positive | Negative | NA | NA | NA | Primary treatment | Confirmed active case |
| 287 | Cough and expectoration for 9 days | Lung CT showed infectious lesions of the right lung, pulmonary tuberculosis to be excluded | One sputum smears were positive. | Positive | Positive | NA | Positive | Non drug resistance | Primary treatment | Confirmed active case |
| 288 | Cough and hemoptysis for 4 days | Lung CT showed tuberculosis in the right lung with cavity formation in the right upper lung | Negative | Positive | Positive | NA | Positive | Non drug resistance | Primary treatment | Confirmed active case |
| 289 | Cough and expectoration for 2 months and fever for 1 week | Lung CT showed patchy and patchy fuzzy high-density shadows in both lungs | One sputum smears were positive. | Negative | Positive | NA | NA | Non drug resistance | Primary treatment | Confirmed active case |
| 290 | Cough and expectoration for 2 months | Lung CT showed tuberculosis in both lungs | One sputum smears were positive. | Positive | Positive | NA | Positive | Non drug resistance | Primary treatment | Confirmed active case |
| 291 | Cough and expectoration for 10 days and fever for 6 days | Lung CT showed tuberculosis in both lungs | One sputum smears were positive. | Positive | Positive | NA | NA | Non drug resistance | Primary treatment | Confirmed active case |
| 292 | Cough and expectoration for 30 years | Lung CT showed multiple spots and cavities in both lungs | Negative | Negative | Positive | NA | Positive | Non drug resistance | Retreatment | Confirmed active case |
| 293 | Hemoptysis for 4 years | Lung CT showed that tuberculosis was more likely in both lungs | Negative | Negative | Positive | NA | Positive | Non drug resistance | Retreatment | Confirmed active case |
| 294 | Cough, expectoration and shortness of breath for 20 days | Lung CT showed tuberculosis with multiple cavities in both lungs | One sputum smears were positive. | Positive | Positive | NA | NA | Non drug resistance | Primary treatment | Confirmed active case |
| 295 | Chest pain for 5 days | Lung CT showed an infection in the upper lobes of both lungs. It may be pulmonary tuberculosis | Negative | Positive | Positive | NA | Positive | Non drug resistance | Primary treatment | Confirmed active case |
| 296 | Cough and expectoration for 2 months | Lung CT showed pulmonary tuberculosis in both lungs | Negative | Positive | Negative | NA | NA | Non drug resistance | Primary treatment | Confirmed active case |
| 297 | Cough, expectoration and hemoptysis for 3 months | Lung CT showed tuberculosis with bronchiectasis and cavity in both lungs | One sputum smears were positive. | Positive | Positive | NA | Negative | Non drug resistance | Primary treatment | Confirmed active case |
| 298 | Cough for half a year | Lung CT showed that there was a high possibility of pulmonary tuberculosis in both cases | One sputum smears were positive. | Positive | Positive | NA | Positive | Non drug resistance | Primary treatment | Confirmed active case |
| 299 | Cough for 1 month | Lung CT showed infectious lesions in the upper lobe and middle lobe of the right lung and the upper lobe of the left lung | One sputum smears were positive. | Positive | Positive | NA | NA | Non drug resistance | Primary treatment | Confirmed active case |
| 300 | Fatigue and anorexia for 3 months | Lung CT showed infectious lesions in both lungs, which was considered to be pulmonary tuberculosis | One sputum smears were positive. | Positive | Negative | NA | NA | Non drug resistance | Retreatment | Confirmed active case |
| 301 | Cough and expectoration for half a month | Lung CT showed tuberculosis in both lungs | Negative | Negative | Positive | NA | NA | Non drug resistance | Primary treatment | Confirmed active case |
| 302 | Cough and expectoration for 4 months | Lung CT shows an infectious lesion in the upper lobe of the right lung, which may be pulmonary tuberculosis | Negative | Positive | Positive | NA | NA | Non drug resistance | Primary treatment | Confirmed active case |
| 303 | Cough and expectoration for half a year | Lung CT showed enlarged lymph nodes in the right lung | One sputum smears were positive. | Positive | NA | NA | NA | Non drug resistance | Primary treatment | Confirmed active case |
| 304 | Cough and expectoration for 3 months | Lung CT showed that there were infectious lesions in both lungs. Pulmonary tuberculosis should be considered | Two sputum smears were positive. | Positive | Positive | NA | NA | Non drug resistance | Primary treatment | Confirmed active case |
| 305 | Cough and expectoration for 1 month | Lung CT showed pulmonary tuberculosis with cavity in the right upper lung | One sputum smears were positive. | Positive | Positive | NA | Positive | Non drug resistance | Primary treatment | Confirmed active case |
| 306 | Cough and expectoration for 3 years | Lung CT showed infectious lesions in the left lung | Negative | Positive | Positive | NA | NA | Non drug resistance | Primary treatment | Confirmed active case |
| 307 | Cough and expectoration for 13 days | Lung CT showed multiple tuberculosis foci in two lungs | Negative | Positive | Positive | NA | Positive | Non drug resistance | Primary treatment | Confirmed active case |
| 308 | Cough and expectoration for 1 month | Lung CT showed multiple cavities with infection in both lungs | One sputum smears were positive. | Positive | Positive | NA | Positive | Non drug resistance | Primary treatment | Confirmed active case |
| 309 | Cough and expectoration for 6 days | Lung CT showed irregular patchy and cord like shadows in both lungs | Negative | Positive | Positive | NA | Positive | Non drug resistance | Primary treatment | Confirmed active case |
| 310 | Cough and expectoration for 3 months | Lung CT showed infectious lesions in both lungs and consolidation of the upper lobe of the right lung with multiple cavity shadows. Pulmonary tuberculosis should be excluded | Three sputum smears were positive. | Positive | Positive | NA | Positive | Non drug resistance | Primary treatment | Confirmed active case |
| 311 | Lung shadow | Lung CT showed spots, patches, fuzzy high-density shadows and multiple cavities in both lungs | Negative | Positive | Positive | NA | Positive | Non drug resistance | Primary treatment | Confirmed active case |
| 312 | Cough for 1 month | Lung CT showed that there was a rapid mass shadow with cavity in the right hilum, and multiple spots and patch blurred shadows in both lungs | Negative | Positive | Positive | NA | NA | Non drug resistance | Primary treatment | Confirmed active case |
| 313 | Cough and expectoration 2 months hemoptysis 5 days | Lung CT showed scattered patches and nodules in both lungs and cavities in the upper right lung | Negative | Positive | Positive | NA | Positive | Fluoroquinolone | Primary treatment | Confirmed active case |
| 314 | Headache and fever for 10 days | Lung CT showed infection in both lungs, which may be pulmonary tuberculosis | Negative | Positive | Positive | NA | Positive | Non drug resistance | Primary treatment | Confirmed active case |
| 315 | Fever and pain for 14 days | Lung CT showed tuberculosis in both lungs | Negative | Positive | Positive | NA | NA | Non drug resistance | Primary treatment | Confirmed active case |
| 316 | Left hip pain and limited activity for 1 month | Lung CT showed bands and nodules in the right upper lung | NA | Positive | Positive | NA | Positive | Non drug resistance | Primary treatment | Confirmed active case |
| 317 | Cough, expectoration and hemoptysis for 1 week | Lung CT showed multiple nodules in the left lung and cavities in the upper lobe of the left lung | Negative | Negative | Positive | NA | Positive | Non drug resistance | Primary treatment | Confirmed active case |
| 318 | Chest tightness, cough and expectoration for 1 month | Lung CT shows that it may be pulmonary tuberculosis | Three sputum smears were positive. | Negative | Negative | NA | Negative | Non drug resistance | Primary treatment | Confirmed active case |
| 319 | Lung shadow for 2 days | Lung CT showed multiple nodules and patchy shadows in both lungs | Negative | Positive | Positive | NA | NA | Non drug resistance | Primary treatment | Confirmed active case |
| 320 | Cough and expectoration for 5 months | Lung CT shows a huge cavity in the left upper lung, which is pulmonary tuberculosis | Two sputum smears were positive. | Positive | Positive | NA | Positive | Non drug resistance | Primary treatment | Confirmed active case |
| 321 | Cough and expectoration for 2 months | Lung CT showed infectious lesions in the upper lobe of the right lung, and pulmonary tuberculosis was to be discharged | One sputum smears were positive. | Positive | Positive | NA | NA | Non drug resistance | Primary treatment | Confirmed active case |
| 322 | Cough and fever for 24 days | Lung CT showed scattered patchy high-density shadows in both lungs | Negative | Negative | Positive | NA | Positive | Non drug resistance | Primary treatment | Confirmed active case |
| 323 | Hemoptysis for 10 days | Lung CT shows that it may be pulmonary tuberculosis | Negative | Positive | Positive | NA | Positive | Non drug resistance | Primary treatment | Confirmed active case |
| 324 | Lung shadow | Lung CT shows tuberculosis at the right lung tip | Negative | Negative | Positive | NA | Positive | Non drug resistance | Primary treatment | Confirmed active case |
| 325 | Cough and expectoration for 1 month | Lung CT showed scattered nodules and cavities in the left upper lung | Negative | Negative | Positive | NA | Positive | Non drug resistance | Primary treatment | Confirmed active case |
| 326 | Fever | Lung CT showed a few fibrous nodules in both lungs | Negative | Positive | Positive | NA | Positive | Non drug resistance | Retreatment | Confirmed active case |
| 327 | Low fever | Lung CT showed that tuberculosis could be found in both lungs | Negative | Positive | Positive | NA | NA | Non drug resistance | Primary treatment | Confirmed active case |
| 328 | Dizzy | Lung CT showed multiple nodular and patchy high-density shadows in both upper lungs and ground glass nodules in the left upper lung. It is considered to be pulmonary tuberculosis | Negative | Negative | Positive | NA | Positive | Non drug resistance | Primary treatment | Confirmed active case |
| 329 | Unconsciousness for 1 day | Lung CT showed chestnut like tuberculosis | One sputum smears were positive. | Positive | Positive | NA | NA | Non drug resistance | Primary treatment | Confirmed active case |
| 330 | Cough and expectoration for 1 month and hemoptysis for 20 days | Lung CT showed multiple nodules and posterior wall cavities in the upper lobe of the left lung. Pulmonary tuberculosis was the first consideration | Negative | Negative | Positive | NA | NA | Non drug resistance | Primary treatment | Confirmed active case |
| 331 | Chest tightness for half a month | Lung CT showed infectious lesions in both lungs, which may be pulmonary tuberculosis | One sputum smears were positive. | Positive | Positive | NA | NA | Streptomycin, rifampicin, isoniazid, ethambutol | Primary treatment | Confirmed active case |
| 332 | Lung shadow for 1 week | Lung CT showed small ground glass nodules in the left upper lung | Negative | Negative | Positive | NA | NA | Non drug resistance | Primary treatment | Confirmed active case |
| 333 | Increased lung shadow for 1 day | Lung CT showed some old tuberculosis in the right lung. Some new lobe tuberculosis in the lower lobe of the two might be large. | Negative | Negative | Positive | NA | NA | Non drug resistance | Retreatment | Confirmed active case |
| 334 | Increased lung shadow for 4 months | Lung CT showed two pulmonary tuberculosis with multiple cavities on the left | Negative | Negative | Positive | NA | NA | Non drug resistance | Retreatment | Confirmed active case |
| 335 | Cough and expectoration for 3 months | Lung CT showed that there were infectious foci in the right lung, and pulmonary tuberculosis should be excluded | Negative | Negative | Positive | NA | Positive | Non drug resistance | Primary treatment | Confirmed active case |
| 336 | Cough, expectoration and fever for half a month | Lung CT showed cavitary lesions in the upper lobe of the right lung | One sputum smears were positive. | Positive | Positive | NA | Positive | Non drug resistance | Primary treatment | Confirmed active case |
| 337 | Cough and expectoration for 5 days and fever for 3 days | Lung CT showed patchy increased density shadow in the left upper lung with cavity formation | One sputum smears were positive. | Positive | Positive | NA | Positive | Non drug resistance | Primary treatment | Confirmed active case |
| 338 | Cough and expectoration for half a year | Lung CT showed tuberculosis in both lungs | Negative | Negative | Positive | NA | NA | NA | Primary treatment | Confirmed active case |
| 339 | Anti tuberculosis treatment for 8 months | Pulmonary CT showed tuberculosis in both lungs with cavity formation in the left lung | Negative | Negative | Positive | NA | NA | Non drug resistance | Retreatment | Confirmed active case |
| 340 | Cough and expectoration for 1 month | Lung CT showed tuberculosis in both lungs | One sputum smears were positive. | Positive | Positive | NA | Positive | Non drug resistance | Primary treatment | Confirmed active case |
| 341 | Cervical lymphadenopathy | Lung CT showed scattered nodules in both lungs, which may be pulmonary tuberculosis | Negative | Positive | Positive | NA | Positive | Non drug resistance | Primary treatment | Confirmed active case |
| 342 | Cough and expectoration for 2 months, sputum and blood for 1 day | Lung CT showed pulmonary tuberculosis | Three sputum smears were positive. | Positive | Positive | NA | Positive | Non drug resistance | Primary treatment | Confirmed active case |
| 343 | Lung shadow for half a month | Lung CT showed local bronchiectasis with infection in both lungs | One sputum smears were positive. | Negative | Positive | NA | NA | Non drug resistance | Primary treatment | Confirmed active case |
| 344 | Anorexia and asthenia | Lung CT showed that there may be pulmonary tuberculosis in both lungs | Negative | Negative | Positive | NA | Positive | Non drug resistance | Primary treatment | Confirmed active case |
| 345 | Cough for half a year | Lung CT showed secondary pulmonary tuberculosis and cavity formation in the upper lobe of the right lung | Two sputum smears were positive. | Positive | Positive | NA | NA | Non drug resistance | Primary treatment | Confirmed active case |
| 346 | Cough, expectoration and hemoptysis for 3 days | Lung CT showed pulmonary tuberculosis | One sputum smears were positive. | Positive | Positive | NA | NA | Non drug resistance | Retreatment | Confirmed active case |
| 347 | Fever for half a month | Lung CT showed infectious lesions in both lungs | Negative | Positive | Positive | NA | NA | Streptomycin, rifampicin, isoniazid, ethambutol | Primary treatment | Confirmed active case |
| 348 | Cough and expectoration for 2 months | Lung CT showed scattered inflammatory foci in both lungs | Negative | Positive | Positive | NA | NA | Non drug resistance | Primary treatment | Confirmed active case |
| 349 | Cough and expectoration for half a year | Lung CT showed tuberculosis in both lungs and nodules in the upper left lung | Negative | Negative | Positive | NA | NA | Non drug resistance | Primary treatment | Confirmed active case |
| 350 | Cough and expectoration for 3 months | Lung CT showed scattered nodules in the right upper lung | One sputum smears were positive. | Positive | Positive | NA | NA | Non drug resistance | Primary treatment | Confirmed active case |
| 351 | Cough, fever and chest pain for 1 day | Lung CT showed patches and nodules in the left lung | One sputum smears were positive. | Positive | Positive | NA | NA | Non drug resistance | Retreatment | Confirmed active case |
| 352 | Fatigue for 1 month | Lung CT showed nodules in the upper lobe of the right lung, which may be pulmonary tuberculosis with cavity | Negative | Positive | Positive | NA | NA | Non drug resistance | Primary treatment | Confirmed active case |
| 353 | Cough and expectoration for 4 months | Lung CT showed tuberculosis with cavity formation in both lungs | Negative | Negative | Positive | NA | NA | Non drug resistance | Primary treatment | Confirmed active case |
| 354 | Cough and expectoration for 1 month and hemoptysis for 5 days | Lung CT showed pulmonary tuberculosis in both lungs | Three sputum smears were positive. | Positive | Positive | NA | NA | Streptomycin, rifampicin, isoniazid, ethambutol | Primary treatment | Confirmed active case |
| 355 | Cough and expectoration for 1 month | Lung CT showed tuberculosis in the upper lobe of the right lung | Negative | Negative | Positive | NA | NA | Non drug resistance | Retreatment | Confirmed active case |
| 356 | Cough and expectoration for 3 months | Lung CT showed patchy increased density shadow in the right upper lung | Two sputum smears were positive. | Positive | Positive | NA | NA | Non drug resistance | Primary treatment | Confirmed active case |
| 357 | Lung shadow for 3 days | Lung CT showed that there were chronic infectious lesions in both lungs and tuberculosis to be discharged | Negative | Positive | Positive | NA | Positive | Non drug resistance | Primary treatment | Confirmed active case |
| 358 | Fever and cough for 12 days | Lung CT showed scattered infectious lesions in the right lung and pulmonary tuberculosis to be discharged | Negative | Negative | Positive | NA | NA | Non drug resistance | Primary treatment | Confirmed active case |
| 359 | Cough and expectoration for 20 years | Lung CT showed tuberculosis with right lung injury in both lungs | Negative | Positive | Positive | NA | NA | Isoniazid | Retreatment | Confirmed active case |
| 360 | Cough and expectoration for 2 months and fever for 3 days | Lung CT showed scattered infection in both lungs and multiple nodules in both lungs | One sputum smears were positive. | Positive | Positive | NA | Positive | Non drug resistance | Primary treatment | Confirmed active case |
| 361 | Cough and expectoration for 5 years | Lung CT showed tuberculosis with cavity in both lungs | Three sputum smears were positive. | Positive | Positive | NA | Positive | Non drug resistance | Primary treatment | Confirmed active case |
| 362 | Chest tightness and shortness of breath for 20 days | Lung CT showed tuberculosis with cavity formation in both lungs | Negative | Negative | Positive | NA | NA | Non drug resistance | Retreatment | Confirmed active case |
| 363 | Cough and expectoration for half a year | NA | One sputum smears were positive. | Positive | Positive | NA | Positive | Non drug resistance | Primary treatment | Confirmed active case |
| 364 | Cough and expectoration for 1 month | Lung CT showed patchy high-density lesions and lesions with cavities in the right lung | One sputum smears were positive. | Positive | Positive | NA | Positive | Non drug resistance | Primary treatment | Confirmed active case |
| 365 | Cough and expectoration for half a month | Lung CT showed patches, nodules and cord shadows in the left upper lung and right lung | One sputum smears were positive. | Positive | Positive | NA | Positive | Non drug resistance | Primary treatment | Confirmed active case |
| 366 | Cough and expectoration for 2 weeks | Lung CT showed nodular masses in the upper lobe of both lungs and the lower lobe of the right lung, suggesting that it may be pulmonary tuberculosis | Negative | Positive | Negative | NA | NA | Non drug resistance | Primary treatment | Confirmed active case |
| 367 | Cough and expectoration for 1 week | Lung CT showed irregular patchy cord like shadows in both lungs | Negative | Positive | Positive | NA | NA | Non drug resistance | Primary treatment | Confirmed active case |
| 368 | Lung shadow | Lung CT showed patchy and cord like high-density shadows in the upper lobe of the right lung | Negative | Negative | Positive | NA | Positive | Non drug resistance | Primary treatment | Confirmed active case |
| 369 | Cough and expectoration for 2 months and hemoptysis for 4 days | Lung CT showed scattered bands, spots and micro nodular high-density shadows in both lungs | Negative | Positive | Positive | NA | Positive | Non drug resistance | Primary treatment | Confirmed active case |
| 370 | Cough, chest tightness and fever for 2 months | Lung CT showed tuberculosis and partial cavity formation in both lungs | Negative | Negative | Positive | NA | NA | Non drug resistance | Primary treatment | Confirmed active case |
| 371 | Cough and expectoration for 1 year | Lung CT showed tuberculosis with cavity in both lungs | Negative | Positive | Positive | NA | NA | Streptomycin | Primary treatment | Confirmed active case |
| 372 | Cough, expectoration, low fever, hemoptysis for 20 days | Lung CT showed tuberculosis with cavity formation in both lungs | Negative | Positive | Positive | NA | NA | Non drug resistance | Primary treatment | Confirmed active case |
| 373 | Cough and expectoration for half a year | Lung CT showed cavity formation in the right upper lung, considering secondary pulmonary tuberculosis | One sputum smears were positive. | Positive | Positive | NA | Positive | Non drug resistance | Primary treatment | Confirmed active case |
| 374 | Cough and expectoration for 6 days | Lung CT showed tuberculosis with multiple cavities in both lungs | One sputum smears were positive. | Positive | NA | NA | NA | Non drug resistance | Primary treatment | Confirmed active case |
| 375 | Cough for 1 month | Lung CT showed multiple small nodules in both lungs, and pulmonary tuberculosis may occur | Negative | Positive | Positive | NA | NA | Non drug resistance | Primary treatment | Confirmed active case |
| 376 | Lung shadow for 3 years | Lung CT showed irregular mass shadow and small cavity in the right upper lung, and scattered fibrous strip shadow in both lungs | Negative | Positive | Positive | NA | Positive | Non drug resistance | Primary treatment | Confirmed active case |
| 377 | Cough and expectoration for eight months | Lung CT showed mass shadow in the middle lobe of the right lung | One sputum smears were positive. | Positive | Positive | NA | NA | Non drug resistance | Primary treatment | Confirmed active case |
| 378 | Chest tightness and shortness of breath for 3 months | Lung CT showed tuberculosis with multiple cavities in both lungs | Two sputum smears were positive. | Negative | Positive | NA | NA | Non drug resistance | Primary treatment | Confirmed active case |
| 379 | Cough and expectoration for 1 month | Lung CT showed tuberculosis in both lungs | Negative | Negative | Positive | NA | Positive | Non drug resistance | Primary treatment | Confirmed active case |
| 380 | Cough and expectoration for 5 years | Lung CT showed ground glass shadow at the right lung tip | One sputum smears were positive. | Positive | Positive | NA | Positive | Non drug resistance | Primary treatment | Confirmed active case |
| 381 | Cough and expectoration for 2 months | Lung CT showed that there were infectious lesions in both lungs, and tuberculosis was possible | One sputum smears were positive. | Positive | Positive | NA | Positive | Non drug resistance | Primary treatment | Confirmed active case |
| 382 | Cough and expectoration for 2 weeks | Lung CT showed scattered nodules in both lungs | Negative | Negative | Positive | NA | NA | Non drug resistance | Primary treatment | Confirmed active case |
| 383 | Asthenia, anorexia and cough for 2 months | Lung CT showed multiple lesions in both lungs, which may be pulmonary tuberculosis | Two sputum smears were positive. | Positive | Positive | NA | Positive | Non drug resistance | Primary treatment | Confirmed active case |
| 384 | Anti tuberculosis for 1 month | Lung CT showed tuberculosis in both lungs | Negative | Negative | Positive | NA | NA | Non drug resistance | Primary treatment | Confirmed active case |
| 385 | Cough and expectoration for 3 days | Lung CT showed multiple infectious lesions in both lungs, and pulmonary tuberculosis could not be ruled out | Negative | Positive | Positive | NA | Negative | Non drug resistance | Retreatment | Confirmed active case |
| 386 | Cough and expectoration for 1 week | Lung CT showed multiple patches of exudation shadow in both lungs, and a large cavity shadow can be seen in the upper left. It is considered to be pulmonary tuberculosis | Two sputum smears were positive. | Positive | Positive | NA | NA | Non drug resistance | Primary treatment | Confirmed active case |
| 387 | Cough and expectoration for 14 months | Lung CT showed that the first consideration was tuberculosis in both lungs | Negative | Negative | Positive | NA | Positive | Non drug resistance | Primary treatment | Confirmed active case |
| 388 | Unconsciousness for 2 days | Lung CT showed tuberculosis in both lungs | Negative | Negative | Positive | NA | NA | Non drug resistance | Primary treatment | Confirmed active case |
| 389 | Cough and expectoration for 3 months | Lung CT shows that there are spots and nodules in both lungs. Pulmonary tuberculosis is considered | Negative | Positive | Positive | NA | Negative | Non drug resistance | Primary treatment | Confirmed active case |
| 390 | Cough, expectoration and fever for 1 week | Lung CT showed infection in both lungs, and pulmonary tuberculosis could not be excluded | One sputum smears were positive. | Positive | Positive | NA | Negative | Non drug resistance | Primary treatment | Confirmed active case |
| 391 | Cough and expectoration for 1 year | Lung CT showed a large amount of pleural effusion in the left pleural cavity with left atelectasis | One sputum smears were positive. | Positive | Positive | NA | Positive | Non drug resistance | Primary treatment | Confirmed active case |
| 392 | Cough and expectoration for 3 years | Lung CT showed nodular high-density shadows in both lungs | One sputum smears were positive. | Positive | Positive | NA | NA | Non drug resistance | Primary treatment | Confirmed active case |
| 393 | Cough and expectoration for 3 months | Lung CT showed nodules in the upper lobe of the right lung | Negative | Positive | Positive | The tissues were positive for Mycobacterium tuberculosis RNA, DNA and X-Pert | Positive | Non drug resistance | Primary treatment | Confirmed active case |
| 394 | Pulmonary lesions increased for 1 month | Lung CT showed pulmonary tuberculosis | Negative | Negative | Positive | NA | NA | Non drug resistance | Primary treatment | Confirmed active case |
| 395 | Cough and expectoration for 1 year | Lung CT showed tuberculosis with cavity in both lungs | Negative | Positive | Positive | NA | Negative | Non drug resistance | Primary treatment | Confirmed active case |
| 396 | Cough and expectoration for 2 months | Lung CT showed a few cord like high-density shadows in the lower lobes of both lungs | Negative | Negative | Positive | The tissues were positive for Mycobacterium tuberculosis DNA and X-Pert | NA | Non drug resistance | Primary treatment | Confirmed active case |
| 397 | Cough and expectoration for 1 year | Lung CT showed consolidation with necrosis in the upper lobe of the left lung, which was considered to be inflammation or tuberculosis | Negative | Positive | Positive | NA | NA | Non drug resistance | Retreatment | Confirmed active case |
| 398 | Cough, expectoration and fever for 10 days | Lung CT showed ground glass patches in the posterior segment of the right upper lobe | Negative | Negative | Positive | NA | NA | Non drug resistance | Primary treatment | Confirmed active case |
| 399 | Cough and expectoration for 2 months | Lung CT showed scattered cord like and small nodular high-density shadows in both lungs, which may be pulmonary tuberculosis | Negative | Positive | Positive | NA | NA | Non drug resistance | Primary treatment | Confirmed active case |
| 400 | Cough and expectoration for 1 month | Lung CT showed tuberculosis in both lungs | One sputum smears were positive. | Positive | Positive | NA | NA | Non drug resistance | Primary treatment | Confirmed active case |
| 401 | Cough and expectoration with shortness of breath for 4 days | Lung CT showed multiple patches and cord shadows in the right upper lung | Negative | Negative | Positive | NA | NA | Non drug resistance | Primary treatment | Confirmed active case |
| 402 | Cough for half a month and fever for 5 days | Lung CT showed diffuse chestnut like nodules on both lungs, multiple spots on both upper lungs, considering the possibility of pulmonary tuberculosis | Two sputum smears were positive. | Positive | Positive | NA | Positive | Non drug resistance | Primary treatment | Confirmed active case |
| 403 | Cough and expectoration for 2 months | Lung CT showed pulmonary tuberculosis in both lungs with cavity formation in the right upper lung | One sputum smears were positive. | Positive | Positive | NA | NA | Non drug resistance | Primary treatment | Confirmed active case |
| 404 | Cough and expectoration for 3 years | Lung CT showed tuberculosis with multiple cavities in both lungs | One sputum smears were positive. | Positive | Positive | NA | NA | Non drug resistance | Primary treatment | Confirmed active case |
| 405 | Cough, expectoration and fever for 10 days | Lung CT showed tuberculosis in both lungs | Negative | Negative | Positive | NA | Positive | Non drug resistance | Primary treatment | Confirmed active case |
| 406 | Cough and expectoration for 20 days | Lung CT showed a small amount of cord like shadow and punctate dense shadow scattered in both lungs | Negative | Positive | Positive | NA | Positive | Streptomycin | Primary treatment | Confirmed active case |
| 407 | Cough and expectoration for 5 years | Lung CT showed many kinds of cavitary manifestations in both lungs | One sputum smears were positive. | Positive | Positive | NA | NA | Non drug resistance | Primary treatment | Confirmed active case |
| 408 | Cough and expectoration for half a month | Lung CT showed plaque and cavity shadow in the left upper lung | One sputum smears were positive. | Positive | Positive | NA | NA | Streptomycin | Retreatment | Confirmed active case |
| 409 | Cough and expectoration for 3 months | Lung CT showed irregular spots and cord like high-density shadows in both lungs | Negative | NA | Positive | NA | NA | Non drug resistance | Retreatment | Confirmed active case |
| 410 | Cough for 2 years | Lung CT showed tuberculosis in both lungs | Three sputum smears were positive. | Negative | Positive | NA | NA | Non drug resistance | Primary treatment | Confirmed active case |
| 411 | Lung shadow for 20 days | Lung CT showed that there were scattered chronic infectious lesions in both lungs, considering the possibility of pulmonary tuberculosis | Negative | Positive | Positive | NA | NA | Non drug resistance | Primary treatment | Confirmed active case |
| 412 | New nodules for half a month | Lung CT showed paramediastinal mass shadow with necrosis in the upper lobe of the right lung, which may be pulmonary tuberculosis | One sputum smears were positive. | Negative | Positive | NA | NA | Non drug resistance | Primary treatment | Confirmed active case |
| 413 | Lung shadow for 11 days | Lung CT showed infection in the upper lobe of the right lung and tuberculosis should be excluded | Negative | Positive | Positive | NA | Positive | Non drug resistance | Primary treatment | Confirmed active case |
| 414 | Cough and expectoration for 2 years | Lung CT showed tuberculosis in both lungs | Negative | Negative | Positive | NA | NA | Non drug resistance | Primary treatment | Confirmed active case |
| 415 | Cough for 4 months | Lung CT showed multiple nodules, patches and cord shadows in both lungs | Negative | Positive | Positive | NA | NA | Non drug resistance | Primary treatment | Confirmed active case |
| 416 | Cough and expectoration for half a month | Lung CT showed scattered tuberculosis in the right lung | Negative | Negative | Positive | NA | NA | Non drug resistance | Primary treatment | Confirmed active case |
| 417 | Cough, expectoration, chest tightness and shortness of breath for half a month | Lung CT showed infection in both lungs | Negative | Negative | Positive | NA | NA | Non drug resistance | Primary treatment | Confirmed active case |
| 418 | Lung shadow for 3 years | Lung CT showed scattered spots, patches and nodular hyperdense shadows in the right lung | One sputum smears were positive. | Positive | Positive | NA | NA | Non drug resistance | Primary treatment | Confirmed active case |
| 419 | Lung shadow for 4 days | Lung CT showed tuberculosis in the right lung with right upper pulmonary cavity | One sputum smears were positive. | Positive | Negative | NA | NA | Non drug resistance | Primary treatment | Confirmed active case |
| 420 | Lung shadow | Lung CT showed right pulmonary tuberculosis | Negative | Negative | Positive | NA | Positive | Non drug resistance | Primary treatment | Confirmed active case |
| 421 | Cough and expectoration for 2 years | Lung CT showed scattered infection or tuberculosis in both lungs | Negative | Negative | Positive | NA | NA | Non drug resistance | Primary treatment | Confirmed active case |
| 422 | Cough and expectoration for 3 months | Lung CT showed diffuse lesions in both lungs. It is considered to be chestnut shaped tuberculosis | Negative | Positive | Positive | NA | NA | Non drug resistance | Primary treatment | Confirmed active case |
| 423 | Cough and expectoration for half a year | Lung CT showed a small nodule in the middle lobe of the right lung and a few bands in the lingual segment of the left upper lung | Three sputum smears were positive. | Positive | Positive | NA | NA | Non drug resistance | Primary treatment | Confirmed active case |
| 424 | Right lower abdominal pain for 3 days | Lung CT shows that it may be pulmonary tuberculosis in the right upper lobe | Negative | Positive | Positive | NA | Positive | Streptomycin, rifampicin | Primary treatment | Confirmed active case |
| 425 | Cough, expectoration and hemoptysis for 5 days | Lung CT showed cavitary lesions in the upper lobe of the left lung with two lung infections | One sputum smears were positive. | Positive | Positive | NA | NA | Non drug resistance | Primary treatment | Confirmed active case |
| 426 | Antituberculosis treatment for 1 month | Lung CT showed tuberculosis with cavity in both lungs | Negative | Positive | Positive | NA | NA | Non drug resistance | Primary treatment | Confirmed active case |
| 427 | Anti tuberculosis treatment for 4 months | Lung CT showed tuberculosis with cavity in the right lung | Negative | Negative | Positive | NA | NA | Non drug resistance | Primary treatment | Confirmed active case |
| 428 | Lung shadow | Lung CT showed that there was tuberculosis in both lungs and the possibility of right tuberculous pleurisy was high | Negative | Negative | Positive | NA | NA | Non drug resistance | Primary treatment | Confirmed active case |
| 429 | Cough for 1 week and hemoptysis | Lung CT showed large consolidation shadow in the upper right lung and multiple spots and nodules in the right lung | One sputum smears were positive. | Positive | Positive | NA | NA | Non drug resistance | Primary treatment | Confirmed active case |
| 430 | Chest tightness and abdominal distension for 3 months | Lung CT showed tuberculosis in both lungs | Negative | Positive | Positive | NA | NA | Non drug resistance | Primary treatment | Confirmed active case |
| 431 | Cough and expectoration for 2 months | Lung CT showed infection and cavity formation in both lungs. Tuberculosis should be considered first | One sputum smears were positive. | Positive | NA | NA | Positive | Non drug resistance | Primary treatment | Confirmed active case |
| 432 | Lung shadow for 10 days | Lung CT showed patchy and cord like high-density shadows in the upper lobe of the right lung and small cavity shadows in the upper left lung | One sputum smears were positive. | Positive | Positive | NA | NA | Non drug resistance | Primary treatment | Confirmed active case |
| 433 | Cough and expectoration for 4 months | Lung CT showed tuberculosis in both lungs | Negative | Positive | Positive | NA | NA | Non drug resistance | Primary treatment | Confirmed active case |
| 434 | Lung shadow for 8 months | Lung CT shows lesions in the right upper lobe, which may be tuberculosis | Three sputum smears were positive. | Negative | Negative | NA | NA | Non drug resistance | Primary treatment | Confirmed active case |
| 435 | Cough and expectoration for half a month | Lung CT showed tuberculosis in both lungs with cavities in the upper left lung | Negative | Negative | Positive | NA | Positive | Non drug resistance | Primary treatment | Confirmed active case |
| 436 | Cough and expectoration for 1 week | Lung CT showed infiltrative pulmonary tuberculosis in the left upper lung | Two sputum smears were positive. | Positive | Positive | NA | NA | Non drug resistance | Primary treatment | Confirmed active case |
| 437 | Cough and expectoration for 1 week | Lung CT shows that there are infectious lesions in both lungs. Tuberculosis is considered | One sputum smears were positive. | Positive | Positive | NA | Positive | Non drug resistance | Primary treatment | Confirmed active case |
| 438 | Cough and expectoration for 1 month | Lung CT showed multiple patchy shadows in the left lung | Negative | Positive | Positive | NA | Positive | Non drug resistance | Primary treatment | Confirmed active case |
| 439 | Cough for 2 weeks | Lung CT showed tuberculosis in the left upper lobe | One sputum smears were positive. | Positive | Positive | NA | Positive | Non drug resistance | Primary treatment | Confirmed active case |
| 440 | Cough and expectoration for 2 months | Lung CT showed atelectasis in the lower right lung and scattered nodule shadows in both lungs | One sputum smears were positive. | Positive | Positive | NA | Positive | Non drug resistance | Primary treatment | Confirmed active case |
| 441 | Cough and expectoration for 2 months | Lung CT showed spots and strips of high-density shadow in both lungs | Negative | Positive | Positive | NA | Positive | Non drug resistance | Primary treatment | Confirmed active case |
| 442 | Cough for half a month | Lung CT showed inflammatory lesions in the left lung and consolidation in some lungs | One sputum smears were positive. | Positive | Negative | NA | NA | Non drug resistance | Primary treatment | Confirmed active case |
| 443 | Cough and expectoration for 1 month | Lung CT showed tuberculosis in the upper lobe of the right lung | Negative | Negative | Positive | NA | NA | Non drug resistance | Retreatment | Confirmed active case |
| 444 | Lung shadow for 10 days | Lung CT showed patches and nodules in the right upper lung | One sputum smears were positive. | Positive | Positive | NA | Positive | Non drug resistance | Primary treatment | Confirmed active case |
| 445 | Cough, expectoration and hemoptysis for 4 weeks | Lung CT showed tuberculosis with cavity formation in both lungs | One sputum smears were positive. | Negative | Negative | NA | NA | Non drug resistance | Primary treatment | Confirmed active case |
| 446 | Cough and shortness of breath for 10 months | Lung CT showed tuberculosis in both lungs | One sputum smears were positive. | Positive | Positive | NA | Positive | Non drug resistance | Primary treatment | Confirmed active case |
| 447 | Lung CT showed cough, expectoration and hemoptysis for half a year | Lung CT showed tuberculosis with cavity formation in both lungs | Negative | Positive | Positive | NA | Positive | Non drug resistance | Primary treatment | Confirmed active case |
| 448 | Cough, expectoration and hemoptysis for 1 month | Lung CT showed infectious lesions in the upper lobe of the left lung | One sputum smears were positive. | Positive | Positive | NA | NA | Non drug resistance | Primary treatment | Confirmed active case |
| 449 | Cough and expectoration for 10 days | Lung CT showed infectious lesions in both lungs with cavity formation, which may be tuberculosis | One sputum smears were positive. | Positive | Positive | NA | Positive | Non drug resistance | Primary treatment | Confirmed active case |
| 450 | Cough and expectoration for 4 months | Lung CT showed tuberculosis in both lungs | One sputum smears were positive. | Positive | Positive | NA | Positive | Isoniazid, streptomycin | Primary treatment | Confirmed active case |
| 451 | Cough and expectoration for 1 month | Lung CT showed scattered nodules in both lungs, and tuberculosis was to be discharged | Negative | NA | Positive | NA | Positive | Non drug resistance | Primary treatment | Confirmed active case |
| 452 | Fever for 10 days | Lung CT showed tuberculosis in both lungs | Negative | Negative | Positive | NA | NA | NA | Primary treatment | Confirmed active case |
| 453 | Lung shadow for 2 months | Lung CT showed tuberculosis in the right upper lobe with cavity formation | Negative | Positive | Positive | NA | Positive | Non drug resistance | Primary treatment | Confirmed active case |
| 454 | Cough and expectoration for half a year | Lung CT showed spotted nodules and strip-shaped high-density shadows in both lungs | Negative | Positive | Positive | NA | Positive | Non drug resistance | Primary treatment | Confirmed active case |
| 455 | Cough and expectoration for 2 months | Lung CT showed patchy increased density in the posterior segment of the right upper lobe tip and the base of both lower lungs | Negative | Positive | Positive | NA | Positive | Non drug resistance | Primary treatment | Confirmed active case |
| 456 | Cough, expectoration for 10 days and hemoptysis | Lung CT showed that it may be tuberculosis with cavity in the left lung | Negative | Positive | Positive | NA | Positive | Non drug resistance | Primary treatment | Confirmed active case |
| 457 | Cough and expectoration for 10 days | Lung CT showed multiple patches and nodules in both lungs | Negative | Negative | Positive | NA | Negative | Non drug resistance | Primary treatment | Confirmed active case |
| 458 | Cough and expectoration for 1 month | Lung CT showed tuberculosis in the left lung | Negative | Positive | Positive | NA | Positive | Streptomycin, rifampicin, isoniazid, ethambutol | Primary treatment | Confirmed active case |
| 459 | Cough and expectoration for 1 month and hemoptysis for 3 days | Lung CT showed lesions with cavity formation in both lungs | One sputum smears were positive. | Positive | Positive | NA | Positive | Rifampicin | Primary treatment | Confirmed active case |
| 460 | Cough and expectoration for 1 month | Lung CT showed irregular patches and cord shadows on both lungs | Negative | Positive | Positive | NA | Positive | Non drug resistance | Primary treatment | Confirmed active case |
| 461 | Cough and expectoration for 1 week | Lung CT showed tuberculosis with small cavity in the left lung | Negative | Negative | Positive | NA | Positive | Non drug resistance | Primary treatment | Confirmed active case |
| 462 | Cough and expectoration for 2 months | Lung CT showed tuberculosis in the right lung with cavity in the right lower lung | Negative | Positive | Positive | NA | Positive | Isoniazid | Primary treatment | Confirmed active case |
| 463 | Cough and expectoration for 10 days | Lung CT showed tuberculosis in both lungs | Negative | Negative | Positive | NA | Positive | Non drug resistance | Primary treatment | Confirmed active case |
| 464 | Cough and expectoration for 8 months and hemoptysis for 5 days | Lung CT showed patchy increased density in the middle and lower lobes of the right lung | Two sputum smears were positive. | Positive | Positive | NA | Positive | Non drug resistance | Primary treatment | Confirmed active case |
| 465 | Cough and expectoration for half a year | Lung CT showed mass shadow in the upper lobe of the right lung, and the possibility of tuberculosis was high | Negative | Positive | Positive | NA | NA | Non drug resistance | Primary treatment | Confirmed active case |
| 466 | Cough and expectoration for 3 months | Lung CT showed patchy shadows in the left lower lung | NA | Negative | Positive | NA | NA | Non drug resistance | Primary treatment | Confirmed active case |
| 467 | Asthenia and anorexia for 1 week | Lung CT showed infectious lesions in both lungs, which may be pulmonary tuberculosis | One sputum smears were positive. | Positive | Positive | NA | NA | Non drug resistance | Primary treatment | Confirmed active case |
| 468 | Cough and expectoration for 20 days | Lung CT showed multiple lesions in the upper lobe of the right lung. Tuberculosis was the first consideration | Negative | Positive | Positive | NA | NA | Non drug resistance | Primary treatment | Confirmed active case |
| 469 | Cough and expectoration for 1 month | Lung CT showed multiple patches and nodules in the left upper lung | Two sputum smears were positive. | Positive | Positive | NA | NA | Non drug resistance | Primary treatment | Confirmed active case |
| 470 | Cough and expectoration for 1 month and fever for 1 week | Lung CT showed patchy and cord like high-density shadows in the right lung | Negative | Positive | Positive | NA | NA | Non drug resistance | Primary treatment | Confirmed active case |
| 471 | Lung shadow | Lung CT showed tree buds, spots and patchy strips in the lower lobe of the right lung and left lung | One sputum smears were positive. | Positive | Positive | NA | Positive | Non drug resistance | Primary treatment | Confirmed active case |
| 472 | Cough and expectoration for 1 week | Lung CT shows that tuberculosis may be considered in both lungs | Negative | Positive | Positive | NA | NA | Streptomycin | Primary treatment | Confirmed active case |
| 473 | Cough and hemoptysis for half a month | Lung CT showed spots and stripes of increased density in both lungs, and cavities in the right lower lung | Negative | Positive | Positive | NA | Positive | Non drug resistance | Primary treatment | Confirmed active case |
| 474 | Lung shadow for 3 days | Lung CT showed spots and strips of high-density shadow in both lungs | Negative | Positive | Positive | NA | NA | Non drug resistance | Primary treatment | Confirmed active case |
| 475 | Cough and expectoration for 1 month | Lung CT showed diffuse lesions in both lungs, which may be pulmonary tuberculosis | One sputum smears were positive. | Positive | Positive | NA | Positive | Non drug resistance | Primary treatment | Confirmed active case |
| 476 | Cough and expectoration for half a year | Lung CT showed patchy nodules in the left lung | One sputum smears were positive. | Positive | Positive | NA | Positive | Non drug resistance | Primary treatment | Confirmed active case |
| 477 | Lung shadow for 1 week | Lung CT showed tuberculosis in the left lung | Negative | Positive | Positive | NA | NA | Non drug resistance | Primary treatment | Confirmed active case |
| 478 | Cough and expectoration for 3 months | Lung CT showed that there were scattered patches and cord shadows in both lungs | Negative | Negative | Positive | NA | NA | Non drug resistance | Primary treatment | Confirmed active case |
| 479 | Cough and expectoration for half a month | Lung CT showed tuberculosis with cavity in the right lung | One sputum smears were positive. | Positive | NA | NA | NA | Non drug resistance | Primary treatment | Confirmed active case |
| 480 | Cough, expectoration and hemoptysis for 3 years | Lung CT showed tuberculosis with cavity in both lungs | Three sputum smears were positive. | Positive | Positive | NA | NA | Streptomycin, rifampicin, isoniazid | Primary treatment | Confirmed active case |
| 481 | Cough and expectoration for 1 month | Lung CT showed tuberculosis in both lungs | Negative | Positive | Positive | NA | NA | Non drug resistance | Primary treatment | Confirmed active case |
| 482 | Cough and expectoration for 2 months | Lung CT showed tuberculosis in both lungs | One sputum smears were positive. | Positive | Positive | NA | Positive | Non drug resistance | Primary treatment | Confirmed active case |
| 483 | Cough and expectoration for 2 weeks | Lung CT showed multiple patchy nodules in both lungs and consolidation in the left lower lung | One sputum smears were positive. | Positive | Positive | NA | NA | Non drug resistance | Primary treatment | Confirmed active case |
| 484 | Cough and expectoration for 1 month | Lung CT showed scattered patches, nodules and consolidation in the upper, middle and lower parts of the right lung | Negative | Negative | Positive | NA | Positive | Non drug resistance | Primary treatment | Confirmed active case |
| 485 | Cough and expectoration for 1 week | Lung CT showed scattered patches and nodules in both lungs | Negative | Positive | Positive | NA | NA | Non drug resistance | Primary treatment | Confirmed active case |
| 486 | Lung shadow | Lung CT showed scattered patches, cord shadows and partial cavities of both lungs | Negative | Positive | Positive | NA | Positive | Non drug resistance | Primary treatment | Confirmed active case |
| 487 | Cough and hemoptysis for 1 day | Lung CT showed patchy increased density shadow in the right lung | Negative | Positive | Positive | NA | NA | Non drug resistance | Primary treatment | Confirmed active case |
| 488 | Cough and expectoration for 2 weeks | Lung CT showed multiple nodules and patches in the upper lobes of both lungs, which may be pulmonary tuberculosis | One sputum smears were positive. | Positive | Positive | NA | NA | Non drug resistance | Primary treatment | Confirmed active case |
| 489 | Cough and expectoration for 1 month | Lung CT showed patchy density increase shadow and cavity formation in the left upper lung | Two sputum smears were positive. | Positive | Positive | NA | Positive | Streptomycin, rifampicin, isoniazid | Primary treatment | Confirmed active case |
| 490 | Cough and expectoration for 2 months | Lung CT showed tuberculosis in both lungs with cavity formation in both upper lungs | One sputum smears were positive. | Positive | Positive | NA | Positive | Non drug resistance | Primary treatment | Confirmed active case |
| 491 | Cough and expectoration for 3 months | Lung CT showed a speckled increase in density in the dorsal segment of the upper and lower lobes of the right lung | One sputum smears were positive. | Positive | Positive | NA | NA | Non drug resistance | Primary treatment | Confirmed active case |
| 492 | Cough, expectoration and hemoptysis for 20 days | Lung CT showed tuberculosis with cavity in both lungs | Two sputum smears were positive. | Positive | Positive | NA | Positive | Non drug resistance | Primary treatment | Confirmed active case |
| 493 | Cough and expectoration for half a month | Lung CT showed scattered nodules and strip-shaped increased density shadows in both lungs | Three sputum smears were positive. | Positive | Positive | NA | Negative | Non drug resistance | Primary treatment | Confirmed active case |
| 494 | Cough and expectoration for 2 months | Lung CT showed tuberculosis in both lungs | Negative | Negative | Positive | NA | Positive | Non drug resistance | Primary treatment | Confirmed active case |
| 495 | Cough and expectoration for 1 month | Lung CT showed tuberculosis in both lungs | Negative | Positive | Positive | NA | Positive | Non drug resistance | Primary treatment | Confirmed active case |
| 496 | Cough and expectoration for 2 weeks | Lung CT showed a large patch, nodular shadow and cavity formation in the lower right lung | Two sputum smears were positive. | Positive | Positive | NA | Positive | Non drug resistance | Primary treatment | Confirmed active case |
| 497 | Cough for 1 week | Lung CT showed tuberculosis with small cavity in the right lung | Negative | Negative | Positive | NA | Negative | Non drug resistance | Primary treatment | Confirmed active case |
| 498 | Cough and expectoration for half a year | Lung CT showed tuberculosis in the right lung | One sputum smears were positive. | Positive | Positive | NA | Negative | Non drug resistance | Primary treatment | Confirmed active case |
| 499 | Cough and expectoration for 4 days | Lung CT showed tuberculosis in both lungs and cavity in the upper left lung | Negative | Positive | Positive | NA | Positive | Non drug resistance | Primary treatment | Confirmed active case |
| 500 | Cough and fever for 1 week | Lung CT showed patches and nodules in the left lung | Negative | Negative | Positive | NA | NA | Non drug resistance | Primary treatment | Confirmed active case |
| 501 | Cough and expectoration for 1 month | Lung CT showed infectious lesions and cavity formation in both lungs. Tuberculosis should be considered first | One sputum smears were positive. | Positive | Positive | NA | Negative | Non drug resistance | Primary treatment | Confirmed active case |
| 502 | Cough and fever for 10 days | Lung CT showed a large consolidation shadow in the left upper lung, extensive patches and nodular shadows in both lungs | Negative | Positive | Positive | NA | NA | Non drug resistance | Primary treatment | Confirmed active case |
| 503 | Lung shadow for 10 days | Lung CT showed multiple spots and exudative shadows on both upper lungs, which may be tuberculosis | Negative | Positive | Positive | NA | Positive | Non drug resistance | Primary treatment | Confirmed active case |
| 504 | Cough and expectoration for 40 years | NA | Three sputum smears were positive. | Negative | Negative | NA | Positive | Non drug resistance | Primary treatment | Confirmed active case |
| 505 | Cough for 7 months | Lung CT showed nodular shadow in the right lower lung | Negative | NA | Positive | NA | Positive | Non drug resistance | Primary treatment | Confirmed active case |
| 506 | Cough and expectoration for 1 month | Lung CT showed scattered nodular and patchy shadows in both lungs | Negative | Negative | Positive | NA | Positive | Non drug resistance | Primary treatment | Confirmed active case |
| 507 | Cough and expectoration for 10 days | Lung CT showed that there were infectious lesions in both lungs and there was a high possibility of tuberculosis with cavity in the upper lobe of the left lung | Negative | Positive | Positive | NA | Positive | Non drug resistance | Primary treatment | Confirmed active case |
| 508 | Cough for 1 day | Lung CT showed that there were scattered patches and nodules in both lungs, and there was cavity formation in the upper right lung | One sputum smears were positive. | Positive | Negative | NA | NA | Streptomycin, rifampicin, isoniazid, ethambutol | Primary treatment | Confirmed active case |
| 509 | Cough, expectoration and night sweat for 1 month | Lung CT showed diffuse chestnut granular density increase shadow in the upper, middle and lower parts of both lungs | One sputum smears were positive. | Positive | Positive | NA | NA | Non drug resistance | Primary treatment | Confirmed active case |
| 510 | Cough and expectoration for 20 days | Lung CT showed tuberculosis in both lungs | Negative | Positive | Positive | NA | Positive | Non drug resistance | Primary treatment | Confirmed active case |
| 511 | Hemoptysis for 4 hours | Lung CT showed that there may be pulmonary tuberculosis in both lungs | Negative | Positive | Negative | NA | Positive | Non drug resistance | Primary treatment | Confirmed active case |
| 512 | Cough for 20 days | Lung CT showed diffuse lesions in both lungs | One sputum smears were positive. | Positive | Negative | NA | Negative | Non drug resistance | Primary treatment | Confirmed active case |
| 513 | Cough and expectoration for 1 month | Lung CT showed that pulmonary tuberculosis with cavity was the first consideration in both lungs | One sputum smears were positive. | Positive | Positive | NA | NA | Non drug resistance | Primary treatment | Confirmed active case |
| 514 | Cough and expectoration for 1 week | Lung CT showed patches, nodules and calcifications in both lungs | Two sputum smears were positive. | Positive | Positive | NA | NA | Non drug resistance | Primary treatment | Confirmed active case |
| 515 | Cough and expectoration for 1 month | Lung CT showed cavity formation in the upper lobe of the left lung | Three sputum smears were positive. | Positive | Positive | NA | NA | Non drug resistance | Primary treatment | Confirmed active case |
| 516 | Cough and expectoration for 4 months | Lung CT showed multiple nodular hyperdense shadows in both lungs, some of which were ground glass nodules | Two sputum smears were positive. | Positive | Positive | NA | NA | Non drug resistance | Primary treatment | Confirmed active case |
| 517 | Cough for 3 months | Lung CT showed that there was a high possibility of pulmonary tuberculosis in both cases | Negative | Negative | Positive | NA | NA | Non drug resistance | Primary treatment | Confirmed active case |
| 518 | Cough for 1 week | Lung CT showed a few streaks in the left lung | One sputum smears were positive. | Positive | Positive | NA | NA | Non drug resistance | Primary treatment | Confirmed active case |
| 519 | Cough and expectoration for 1 month | Lung CT showed tuberculosis in both lungs and cavity in the left upper lung | Negative | Positive | Positive | NA | NA | Non drug resistance | Primary treatment | Confirmed active case |
| 520 | Cough and expectoration for more than 6 months | Lung CT showed tuberculosis in the right lung | Negative | Positive | Positive | NA | Positive | Non drug resistance | Primary treatment | Confirmed active case |
| 521 | Cough, expectoration for 5 days, hemoptysis for 1 day | Lung CT shows that it may be pulmonary tuberculosis | One sputum smears were positive. | Positive | Positive | NA | Negative | Non drug resistance | Primary treatment | Confirmed active case |
| 522 | Cough and expectoration for 1 month | Lung CT showed infectious lesions with cavities in the left and right upper lobes | Two sputum smears were positive. | Positive | Positive | NA | NA | Non drug resistance | Primary treatment | Confirmed active case |
| 523 | Cough for 1 week | Lung CT showed scattered patches and increased density of spots in both lungs | Negative | Positive | Positive | NA | Positive | Non drug resistance | Primary treatment | Confirmed active case |
| 524 | Dry cough for 2 months | Lung CT shows that it may be pulmonary tuberculosis | Negative | Positive | Positive | NA | Positive | Non drug resistance | Primary treatment | Confirmed active case |
| 525 | Cough and expectoration for 1 month | Lung CT showed ground glass shadow with a little cord shadow in two lung tip patches | Negative | Negative | Positive | NA | NA | Non drug resistance | Primary treatment | Confirmed active case |
| 526 | Cough and expectoration for half a year | Lung CT showed patches and nodules in the right hilum and left upper middle lung | Negative | Negative | Positive | NA | NA | Non drug resistance | Primary treatment | Confirmed active case |
| 527 | Cough and expectoration for 7 months | Lung CT shows that there may be tuberculosis in both lungs | Negative | Positive | Negative | NA | NA | Non drug resistance | Primary treatment | Confirmed active case |
| 528 | Cough and expectoration for 2 months | Lung CT showed that there were scattered patches and dot strip density shadows in both lungs | One sputum smears were positive. | Positive | Positive | NA | NA | Non drug resistance | Primary treatment | Confirmed active case |
| 529 | Cough and expectoration for 1 month | Lung CT showed tuberculosis in both lungs | Negative | Positive | Positive | NA | NA | Non drug resistance | Primary treatment | Confirmed active case |
| 530 | Cough and expectoration for 3 months | Lung CT showed tuberculosis in both lungs with the formation of small cavities in the lower right lung | One sputum smears were positive. | Positive | Positive | NA | Positive | Non drug resistance | Primary treatment | Confirmed active case |
| 531 | Cough, expectoration for 10 days, hemoptysis for 6 days | Lung CT showed scattered nodules and patches in the left lung and cavity formation in the left upper lung | Negative | Negative | Positive | NA | Negative | Non drug resistance | Primary treatment | Confirmed active case |
| 532 | Cough, expectoration and fever for 20 days | Lung CT showed patchy fuzzy high-density shadows in both lungs | One sputum smears were positive. | Negative | Positive | Pathology suggests granulomatous inflammation | NA | Non drug resistance | Primary treatment | Confirmed active case |
| 533 | Cough and expectoration for 5 months | Lung CT showed tuberculosis in both lungs | Negative | Negative | Positive | NA | NA | Non drug resistance | Primary treatment | Confirmed active case |
| 534 | Cough and fever for 4 days | Lung CT showed tuberculosis in both lungs | Negative | Positive | Positive | NA | Negative | Non drug resistance | Primary treatment | Confirmed active case |
| 535 | Cough and expectoration for half a year | Lung CT showed tuberculosis in both lungs and lymph node tuberculosis in the left hilar | Two sputum smears were positive. | Positive | Positive | NA | Positive | Non drug resistance | Primary treatment | Confirmed active case |
| 536 | Lung shadow | Lung CT showed tuberculosis in both lungs | Negative | Positive | Positive | NA | NA | Non drug resistance | Primary treatment | Confirmed active case |
| 537 | Cough and expectoration for 1 year | Lung CT showed tuberculosis in both lungs with the formation of cavity in the upper lobe of the right lung | One sputum smears were positive. | Positive | Positive | NA | NA | Non drug resistance | Primary treatment | Confirmed active case |
| 538 | Cervical lymph node enlargement for 20 days | Lung CT shows that the right lung may be tuberculosis | Negative | Positive | Positive | NA | NA | Non drug resistance | Primary treatment | Confirmed active case |
| 539 | Lung shadow | Lung CT showed patches, nodules, calcifications and small cavities in the right upper lung | One sputum smears were positive. | Positive | Positive | NA | NA | Non drug resistance | Primary treatment | Confirmed active case |
| 540 | Cough and expectoration 2 months hemoptysis 3 days | Lung CT showed lesions in the left upper lung and exudative lesions in both upper lungs | Three sputum smears were positive. | Positive | Positive | NA | NA | Streptomycin, rifampicin, isoniazid, ethambutol | Primary treatment | Confirmed active case |
| 541 | Cough and fever for 1 month | Lung CT showed tuberculosis in both lungs | Negative | Positive | Positive | NA | NA | Non drug resistance | Primary treatment | Confirmed active case |
| 542 | Cough and expectoration for 2 days | Lung CT showed infection in both lungs. Tuberculosis was the first consideration | Negative | Positive | Positive | NA | Positive | Non drug resistance | Primary treatment | Confirmed active case |
| 543 | Dry cough for 1 month | Lung CT showed spots and striped high-density shadows in both lungs | Negative | Positive | Positive | NA | NA | Non drug resistance | Primary treatment | Confirmed active case |
| 544 | Cough and expectoration for 9 days | Lung CT showed infection in both lungs with cavity formation in the lower lobe of the left lung, which was considered to be tuberculosis | One sputum smears were positive. | Positive | Positive | NA | NA | Non drug resistance | Primary treatment | Confirmed active case |
| 545 | Fever for 1 month | Lung CT showed that there may be tuberculosis in the upper lobe of the left lung | Negative | Positive | Positive | NA | NA | Non drug resistance | Primary treatment | Confirmed active case |
| 546 | Cough and expectoration for 10 days | Lung CT showed large consolidation and internal cavity shadow in the right lower lung | One sputum smears were positive. | Negative | Positive | NA | NA | Non drug resistance | Primary treatment | Confirmed active case |
| 547 | Paroxysmal cough | Lung CT showed nodules and patchy fuzzy high-density shadows in both lungs | Negative | Positive | Positive | NA | Positive | Non drug resistance | Primary treatment | Confirmed active case |
| 548 | Cough and expectoration for 1 year | Lung CT showed tuberculosis in the upper lobe of the left lung | Negative | Positive | Positive | NA | Positive | Non drug resistance | Primary treatment | Confirmed active case |
| 549 | Antituberculosis treatment for 1 month | Lung CT showed that tuberculosis was the first consideration in both lungs | Negative | Negative | Positive | NA | Negative | Non drug resistance | Primary treatment | Confirmed active case |
| 550 | Cough, expectoration and hemoptysis for 8 months | Lung CT showed tuberculosis in both lungs | One sputum smears were positive. | Positive | Positive | NA | NA | Non drug resistance | Primary treatment | Confirmed active case |
| 551 | Cough for 1 year and hemoptysis for 3 days | Lung CT showed local bronchiectasis in the lower lobe of the left lung and scattered inflammation in both lungs | One sputum smears were positive. | Positive | Positive | NA | Positive | Non drug resistance | Primary treatment | Confirmed active case |
| 552 | Antituberculosis treatment for 2 months | Lung CT showed small nodules and patchy high-density shadows in both lungs | Three sputum smears were positive. | Negative | Positive | NA | NA | Non drug resistance | Primary treatment | Confirmed active case |
| 553 | Cough and expectoration for 20 days | Lung CT showed multiple patches and nodular hyperdense shadows in the right and left upper lungs | Negative | Negative | Positive | NA | Positive | Non drug resistance | Primary treatment | Confirmed active case |
| 554 | Cough for 2 days | Lung CT showed lumpy density increasing shadow in the lower lobe of the right lung | Negative | Positive | Positive | NA | Positive | Non drug resistance | Primary treatment | Confirmed active case |
| 555 | Cough and expectoration for 10 days | Lung CT showed tuberculosis in both lungs | Negative | Positive | Positive | NA | NA | Non drug resistance | Primary treatment | Confirmed active case |
| 556 | Cough and expectoration for half a year | Lung CT showed patchy and cord like high-density shadows in the upper lobe of the right lung | Negative | Positive | Positive | NA | Positive | Non drug resistance | Primary treatment | Confirmed active case |
| 557 | Cough and expectoration for 2 months | Lung CT showed tuberculosis with cavity formation in the upper lobe of the right lung | Three sputum smears were positive. | Positive | Positive | NA | Positive | Isoniazid | Retreatment | Confirmed active case |
| 558 | Lung shadow for 1 week | Lung CT showed scattered nodular and strip-shaped increased density shadows in both upper lungs and the formation of cavities in the right upper lung | Negative | Positive | Positive | NA | Positive | Non drug resistance | Primary treatment | Confirmed active case |
| 559 | Cough and expectoration for 1 month | Lung CT showed that it may be tuberculosis in both lungs | Negative | Positive | Positive | NA | Positive | Non drug resistance | Primary treatment | Confirmed active case |
| 560 | Cough and expectoration for 2 months | Lung CT showed infection and bronchiectasis in the upper lobe of the right lung | One sputum smears were positive. | Positive | Positive | NA | Positive | Non drug resistance | Primary treatment | Confirmed active case |
| 561 | Lung shadow for 40 days | Lung CT shows that tuberculosis may be in the right lung | Negative | Positive | Positive | NA | NA | Non drug resistance | Primary treatment | Confirmed active case |
| 562 | Cough and expectoration for 1 year | Lung CT showed tuberculosis in both lungs with cavity formation in the right upper lung | Negative | Negative | Positive | NA | NA | Non drug resistance | Retreatment | Confirmed active case |
| 563 | Cough, expectoration and hemoptysis for 3 months | Lung CT showed tuberculosis with cavity in both lungs | One sputum smears were positive. | Positive | Positive | NA | Positive | Non drug resistance | Primary treatment | Confirmed active case |
| 564 | Fever for 1 week | Lung CT showed spots, tree buds, patches, nodules, increased fiber density and small cavities in the dorsal segment of the upper and lower lobes of the right lung | Negative | Positive | Positive | NA | Positive | Non drug resistance | Primary treatment | Confirmed active case |
| 565 | Cough and expectoration for 3 months | Lung CT showed tuberculosis in both lungs | Two sputum smears were positive. | Positive | Positive | NA | NA | Non drug resistance | Primary treatment | Confirmed active case |
| 566 | Cough, expectoration for 2 months and hemoptysis for 10 days | Lung CT showed scattered patches and nodular increased density shadow in both lungs and cavity shadow in the right upper lung | Three sputum smears were positive. | Positive | Positive | NA | Positive | Non drug resistance | Primary treatment | Confirmed active case |
| 567 | Cough and expectoration for 2 months | Lung CT showed lesions with cavity formation in both lungs | One sputum smears were positive. | Positive | Positive | NA | NA | Non drug resistance | Primary treatment | Confirmed active case |
| 568 | Anti tuberculosis treatment for 6 months | Lung CT showed pulmonary tuberculosis in the upper lobe of the right lung and the formation of new cavities in the upper lobe of the right lung | Negative | Negative | Positive | NA | NA | Non drug resistance | FALSE | Confirmed active case |
| 569 | Cough and expectoration for 10 days | Lung CT showed tuberculosis in both lungs with cavity formation in the right upper lung | One sputum smears were positive. | Positive | Negative | NA | Positive | Non drug resistance | Primary treatment | Confirmed active case |
| 570 | Cough and expectoration for 1 month | Lung CT showed patchy nodule shadow and cavity formation in the right lower lung | Negative | Positive | Positive | NA | Positive | Non drug resistance | Primary treatment | Confirmed active case |
| 571 | Cough and expectoration for 1 month | Lung CT showed tuberculosis with cavity formation in both lungs | Two sputum smears were positive. | Negative | Positive | NA | NA | Non drug resistance | Primary treatment | Confirmed active case |
| 572 | Lung shadow for 20 days | Lung CT showed lesions in both lungs, which may be tuberculosis | Negative | Negative | Positive | NA | Positive | Non drug resistance | Primary treatment | Confirmed active case |
| 573 | Cough and expectoration for 2 months | Lung CT showed patches and strips of increased density and partial damage in the right upper lung | Two sputum smears were positive. | Positive | Positive | NA | NA | Streptomycin, rifampicin, isoniazid, ethambutol | Primary treatment | Confirmed active case |
| 574 | Cough and expectoration for 20 days | Lung CT showed infectious lesions in both lungs. Tuberculosis was the first consideration | Negative | Negative | Positive | NA | NA | Non drug resistance | Primary treatment | Confirmed active case |
| 575 | Cough and expectoration for 1 month | Lung CT showed multiple lesions and infectious lesions in both lungs | One sputum smears were positive. | Positive | Positive | NA | Positive | Non drug resistance | Primary treatment | Confirmed active case |
| 576 | Cough and expectoration for 1 month | Lung CT showed a patchy shadow around the right upper hilar | Negative | Positive | Positive | NA | Positive | Non drug resistance | Primary treatment | Confirmed active case |
| 577 | Cough and expectoration for 1 month | Lung CT showed that there were scattered infectious lesions in both lungs, and the possibility of tuberculosis was high | One sputum smears were positive. | Positive | Positive | NA | NA | Non drug resistance | Primary treatment | Confirmed active case |
| 578 | Cough and expectoration for 2 months | Lung CT showed tuberculosis in both lungs | Negative | Negative | Positive | NA | NA | Non drug resistance | Primary treatment | Confirmed active case |
| 579 | Cough and expectoration for half a month | Lung CT showed atelectasis and hilar enlargement in the upper lobe of the left lung | Three sputum smears were positive. | Negative | Positive | NA | Positive | Non drug resistance | Primary treatment | Confirmed active case |
| 580 | Cough and expectoration for 1 year | Lung CT showed tuberculosis in both lungs | Two sputum smears were positive. | Positive | Positive | NA | NA | Non drug resistance | Primary treatment | Confirmed active case |
| 581 | Lung shadow for 4 days | Lung CT showed spots and patches of increased density in the dorsal segment of the right lower lung | Negative | Negative | Positive | NA | NA | Non drug resistance | Primary treatment | Confirmed active case |
| 582 | Cough and expectoration for half a month | Lung CT showed infectious lesions in the upper lobe of both lungs and the lower lobe of the right lung, which may be tuberculosis | One sputum smears were positive. | Positive | Positive | NA | NA | Non drug resistance | Primary treatment | Confirmed active case |
| 583 | Cough and expectoration for 3 months | Lung CT showed multiple lesions and cavity formation in the left lung | One sputum smears were positive. | Positive | Positive | NA | Positive | Non drug resistance | Primary treatment | Confirmed active case |
| 584 | Cough and expectoration for 1 year | Lung CT showed scattered nodules and cord shadows in the right lung | One sputum smears were positive. | Positive | Positive | NA | Positive | Non drug resistance | Primary treatment | Confirmed active case |
| 585 | Cough and expectoration for 1 month | Lung CT showed diffuse chestnut like density increase shadow in both lungs | Negative | Positive | Positive | NA | Positive | Streptomycin | Primary treatment | Confirmed active case |
| 586 | Cough for 10 days | Lung CT showed multiple patches and exudative shadows, and most of the consolidation and cavity shadows in both lungs | One sputum smears were positive. | Positive | Positive | NA | Positive | Non drug resistance | Primary treatment | Confirmed active case |
| 587 | Cough and expectoration for 10 days | Lung CT showed active tuberculosis in both lungs | Negative | Negative | Positive | NA | Positive | Non drug resistance | Primary treatment | Confirmed active case |
| 588 | Cough and expectoration for 2 years | Lung CT showed chronic infection in the middle lobe of the right lung and the lower lobe of the left lung and multiple nodules in both lower lungs | One sputum smears were positive. | Positive | Negative | NA | Positive | Non drug resistance | Primary treatment | Confirmed active case |
| 589 | Cough and expectoration for half a year | Lung CT showed multiple nodules in both lungs and multiple patches in the left upper lung | Negative | Positive | Positive | NA | Positive | Non drug resistance | Primary treatment | Confirmed active case |
| 590 | Cough for 1 week | Lung CT showed strip shadow in both upper lungs and new mass nodule shadow in the right lower lung | Three sputum smears were positive. | Positive | Positive | NA | NA | Non drug resistance | Primary treatment | Confirmed active case |
| 591 | Cough and expectoration for half a month and hemoptysis for 1 day | Lung CT showed that it may be tuberculosis in the upper lobe of the right lung | Negative | Positive | Positive | NA | Positive | Non drug resistance | Primary treatment | Confirmed active case |
| 592 | Cough and expectoration for half a month | Lung CT showed infection in both lungs, which may be tuberculosis | One sputum smears were positive. | Positive | Positive | NA | NA | Streptomycin, rifampicin | Retreatment | Confirmed active case |
| 593 | Fever for 2 days | Lung CT showed that there were scattered patches in both lungs | Negative | Negative | Positive | NA | Positive | Non drug resistance | Primary treatment | Confirmed active case |
| 594 | Cough and expectoration for 3 days | Lung CT showed scattered nodular shadows in both lungs and multiple patches and nodular shadows in the right upper lung | One sputum smears were positive. | Positive | Positive | NA | Positive | Non drug resistance | Primary treatment | Confirmed active case |
| 595 | Cough for 1 day | Lung CT showed nodules and small cavities in the right upper lung | One sputum smears were positive. | Negative | Negative | NA | Positive | NA | Primary treatment | Confirmed active case |
| 596 | Cough and expectoration for 1 year | Lung CT showed patches, nodules and cord shadows in the posterior segment of the left upper lung apex | Negative | Negative | Positive | NA | Positive | Non drug resistance | Primary treatment | Confirmed active case |
| 597 | Left breast pain for 10 days | Lung CT showed extensive patches and nodules in both lungs | One sputum smears were positive. | Positive | Positive | NA | Positive | Non drug resistance | Primary treatment | Confirmed active case |
| 598 | Lung shadow for 10 days | Lung CT showed scattered nodules and cords in the left lower lung | Negative | Positive | Positive | NA | NA | Non drug resistance | Primary treatment | Confirmed active case |
| 599 | Lung shadow for 3 days | Lung CT showed tuberculosis in the left upper lobe | One sputum smears were positive. | Negative | Positive | NA | Positive | Non drug resistance | Primary treatment | Confirmed active case |
| 600 | Cough, expectoration and hemoptysis for half a year | Lung CT showed tuberculosis in both lungs with cavity in the right upper lung | Negative | Positive | Positive | NA | Positive | Non drug resistance | Primary treatment | Confirmed active case |
| 601 | Cough and expectoration for 1 month | Lung CT showed patchy high-density shadows in both lungs | Negative | Negative | Positive | NA | Positive | Non drug resistance | Primary treatment | Confirmed active case |
| 602 | Fever for 1 week | Lung CT showed infection in the upper lobe of the right lung, which may be pulmonary tuberculosis | Negative | Positive | Positive | NA | NA | Non drug resistance | Primary treatment | Confirmed active case |
| 603 | Cough and hemoptysis for 1 week | Lung CT showed tuberculosis and cavity formation in both lungs | Negative | Negative | Positive | NA | NA | Non drug resistance | Primary treatment | Confirmed active case |
| 604 | Cough and hemoptysis for 1 week | Lung CT shows that tuberculosis may be in the left lung | Negative | Positive | Positive | NA | Positive | Non drug resistance | Primary treatment | Confirmed active case |
| 605 | Lung shadow | Lung CT showed patches and nodules in the left upper lung | Negative | Positive | Positive | NA | Positive | Non drug resistance | Primary treatment | Confirmed active case |
| 606 | Cough and expectoration for 20 days | Lung CT showed spots and striped high-density shadows in both lungs and cavity formation in the upper lobe of the left lung | Negative | Positive | Positive | NA | Positive | Streptomycin | Primary treatment | Confirmed active case |
| 607 | Cough and expectoration for 3 months | Lung CT showed scattered patches and speckles in the left upper lung and both lower lungs | One sputum smears were positive. | Positive | Positive | NA | NA | Non drug resistance | Primary treatment | Confirmed active case |
| 608 | Cough and expectoration for half a year | Lung CT showed tuberculosis in both lungs with the formation of left lower cavity | Negative | Negative | Positive | NA | NA | Non drug resistance | Primary treatment | Confirmed active case |
| 609 | Fatigue for 1 month | Lung CT showed the formation of cavity in the upper lobe of the right lung | One sputum smears were positive. | Negative | Positive | NA | NA | Non drug resistance | Primary treatment | Confirmed active case |
| 610 | Right knee nodule redness and swelling for 12 years | Lung CT showed that it may be tuberculosis in both upper lungs | Negative | Positive | Positive | NA | NA | Non drug resistance | Primary treatment | Confirmed active case |
| 611 | Cough and expectoration for half a year | Lung CT showed multiple spots, increased spot density and multiple cavities in the right lung | Two sputum smears were positive. | Positive | Negative | NA | Positive | Non drug resistance | Primary treatment | Confirmed active case |
| 612 | Cough and expectoration for 3 months | Lung CT showed tuberculosis in both lungs | One sputum smears were positive. | Negative | Positive | NA | NA | Non drug resistance | Primary treatment | Confirmed active case |
| 613 | Cough for 10 days | Lung CT showed tuberculosis with cavity formation in both lungs | One sputum smears were positive. | Positive | Positive | NA | Positive | Non drug resistance | Primary treatment | Confirmed active case |
| 614 | Cough and expectoration for 20 days | Lung CT showed a mass shadow in the upper lobe of the right lung, which may be tuberculosis | Negative | Negative | Positive | NA | NA | Non drug resistance | Primary treatment | Confirmed active case |
| 615 | Lung shadow | Lung CT showed tuberculosis in both upper lungs | Negative | Negative | Positive | NA | NA | Non drug resistance | Primary treatment | Confirmed active case |
| 616 | Cough and expectoration for 1 month | Lung CT showed tuberculosis in both lungs with cavity in the right upper lung | One sputum smears were positive. | Negative | Positive | NA | NA | Non drug resistance | Primary treatment | Confirmed active case |
| 617 | Cough for 20 days | Lung CT showed patches and nodules in the upper lobe of the right lung and multiple nodules in both lungs | Negative | Negative | Positive | NA | NA | Non drug resistance | Primary treatment | Confirmed active case |
| 618 | Cough, expectoration and hemoptysis for 3 days | Lung CT showed that there were spotted nodules and high-density patches in both lungs | One sputum smears were positive. | Positive | Positive | NA | NA | Non drug resistance | Primary treatment | Confirmed active case |
| 619 | Lung shadow for 1 year | Lung CT showed lesions and cavity formation in the right upper lung | Negative | Negative | Positive | NA | NA | Non drug resistance | Primary treatment | Confirmed active case |
| 620 | Cough and expectoration for 3 years | Lung CT showed patches and punctate increased density shadows in both lungs | One sputum smears were positive. | Positive | Negative | NA | NA | Non drug resistance | Primary treatment | Confirmed active case |
| 621 | Cough, expectoration and hemoptysis for 6 months | Lung CT showed that it may be cavitary tuberculosis in the left upper lung | One sputum smears were positive. | Negative | Positive | NA | Positive | Non drug resistance | Primary treatment | Confirmed active case |
| 622 | Abdominal distension for 1 month | Lung CT showed spots, stripes, high-density shadows and multiple cavities in both lungs | Negative | Positive | Positive | NA | NA | Streptomycin | Primary treatment | Confirmed active case |
| 623 | Cough and expectoration for 10 days | Lung CT showed scattered patches and nodules, calcified shadows and local cavity fluid levels in both lungs | One sputum smears were positive. | Positive | Positive | NA | NA | Isoniazid | Retreatment | Confirmed active case |
| 624 | Lung shadow for 10 days | Lung CT showed multiple spots, exudative shadows and nodule shadows in both lungs | Negative | Negative | Positive | NA | Positive | Non drug resistance | Primary treatment | Confirmed active case |
| 625 | Cough, sputum and blood for 2 months | Lung CT showed patchy increased density shadow in the right upper lung | One sputum smears were positive. | Positive | Positive | NA | NA | Non drug resistance | Primary treatment | Confirmed active case |
| 626 | Antituberculosis treatment for 1 month | Lung CT showed that it may be tuberculosis in both lungs | Negative | Negative | Positive | NA | Positive | Non drug resistance | Primary treatment | Confirmed active case |
| 627 | Cough and expectoration for 1 week | Lung CT showed that the first consideration was tuberculosis in both lungs | Negative | Negative | Positive | NA | NA | Non drug resistance | Primary treatment | Confirmed active case |
| 628 | Cough and expectoration for 3 days | Lung CT showed that there were patches and punctate increased density shadows in both lower lungs | Two sputum smears were positive. | Positive | Positive | NA | Positive | Non drug resistance | Primary treatment | Confirmed active case |
| 629 | Cough and expectoration for 2 weeks | Lung CT showed spot nodule shadow on the upper right lung and patch shadow and strip shadow on the lower right middle lung | Negative | Negative | Positive | NA | Positive | Non drug resistance | Primary treatment | Confirmed active case |
| 630 | Cough and expectoration for 1 year | Lung CT showed tuberculosis in both lungs and damage in the left lower lung | Two sputum smears were positive. | Positive | Positive | NA | NA | Non drug resistance | Primary treatment | Confirmed active case |
| 631 | Cough and expectoration for 2 months | Lung CT showed tuberculosis with cavity formation in both lungs | Negative | Positive | Positive | NA | Negative | Non drug resistance | Primary treatment | Confirmed active case |
| 632 | Cough and expectoration for half a month | Lung CT showed that there were scattered patches and spots of increased density in the upper, middle, lower and right middle of the left lung | One sputum smears were positive. | Positive | Positive | NA | Negative | Non drug resistance | Primary treatment | Confirmed active case |
| 633 | Lung shadow for 1 day | Lung CT showed multiple patches and small nodular high-density shadows in both lungs. It may be tuberculosis | Negative | Negative | Positive | NA | Positive | Non drug resistance | Primary treatment | Confirmed active case |
| 634 | Lung shadow for 5 days | Lung CT showed multiple nodules in both lungs and cavities in the right upper lung | One sputum smears were positive. | Positive | Positive | NA | Positive | Non drug resistance | Primary treatment | Confirmed active case |
| 635 | Cough and expectoration for 1 month | Lung CT showed large consolidation shadows in the left upper lung and scattered patches and nodules in both lungs | One sputum smears were positive. | Positive | Positive | NA | NA | Non drug resistance | Primary treatment | Confirmed active case |
| 636 | Cough and expectoration for 3 weeks | Lung CT showed diffuse chestnut nodule shadow in both lungs and strip shadow in the left lower lung with local small cavity formation | Negative | Negative | Positive | NA | Positive | Non drug resistance | Primary treatment | Confirmed active case |
| 637 | Cough and expectoration for 5 months | Lung CT showed extensive patches and punctate increased density in both lungs, and multiple cavities were formed in the left lung | Three sputum smears were positive. | Positive | Positive | NA | Positive | Non drug resistance | Primary treatment | Confirmed active case |
| 638 | Cough and expectoration with blood in sputum for 5 months | Lung CT showed a cavity in the upper lobe of the right lung | One sputum smears were positive. | Positive | Positive | NA | NA | Non drug resistance | Primary treatment | Confirmed active case |
| 639 | Cough, expectoration and hemoptysis for 2 days | Lung CT showed consolidation nodules in the right upper lung | Negative | Negative | Positive | NA | Positive | Non drug resistance | Primary treatment | Confirmed active case |
| 640 | Cough and expectoration for half a year | Lung CT showed that there were scattered patches and nodules in both lungs and consolidation cavity in the left lower lung | One sputum smears were positive. | Positive | Positive | NA | Positive | Non drug resistance | Primary treatment | Confirmed active case |
| 641 | Cough and expectoration for 4 months | Lung CT showed multiple patches and nodules exudation in both lungs and cavities in the left upper lung | Two sputum smears were positive. | Positive | Positive | NA | Positive | Non drug resistance | Primary treatment | Confirmed active case |
| 642 | Cough and expectoration for 1 month | Lung CT showed nodular shadow and cavity formation in the dorsal segment of the left lower lobe | Negative | Negative | Positive | NA | NA | Non drug resistance | Primary treatment | Confirmed active case |
| 643 | Abdominal pain and diarrhea for 3 days | Lung CT showed tuberculosis and cavity formation in the lower lobe of the left lung | Three sputum smears were positive. | Positive | Positive | NA | NA | Non drug resistance | Primary treatment | Confirmed active case |
| 644 | Lung shadow for 5 days | Lung CT showed patches and spots of increased density in the posterior segment of the upper lobe and the dorsal segment of the lower lobe of the right lung | One sputum smears were positive. | Negative | Positive | NA | Positive | Non drug resistance | Primary treatment | Confirmed active case |
| 645 | Cough and expectoration for 2 months | Lung CT showed extensive patches, nodule shadows and local small cavities in both lungs | One sputum smears were positive. | Positive | Positive | NA | Negative | Non drug resistance | Primary treatment | Confirmed active case |
| 646 | Cough and expectoration for 2 months | Lung CT showed multiple spots, strips and nodular high-density shadows in the upper lobe of the right lung | Negative | Negative | Positive | NA | Positive | Non drug resistance | Primary treatment | Confirmed active case |
| 647 | Repeated abdominal distension for 50 days | Lung CT showed patches and nodular high-density shadows in the upper lobes of both lungs | Negative | Negative | Positive | NA | Negative | Non drug resistance | Primary treatment | Confirmed active case |
| 648 | Cough for 1 month | Lung CT showed tuberculosis in both lungs | One sputum smears were positive. | Negative | Positive | NA | NA | Non drug resistance | Primary treatment | Confirmed active case |
| 649 | Cough and expectoration and blood in sputum for 2 months | Lung CT showed scattered infectious lesions in both lungs, which may be tuberculosis | Two sputum smears were positive. | Positive | Positive | NA | Positive | Non drug resistance | Primary treatment | Confirmed active case |
| 650 | Fever for 1 month | Lung CT showed that there was tuberculosis with cavity in both lungs | One sputum smears were positive. | Negative | Positive | NA | Positive | Non drug resistance | Primary treatment | Confirmed active case |
| 651 | Cough and expectoration for 1 month | Lung CT showed multiple nodular and patchy increased density shadows in the left lung and ground glass nodules in the lower lobes of both lungs. It is considered to be pulmonary tuberculosis | Negative | Negative | Positive | NA | Positive | Non drug resistance | Primary treatment | Confirmed active case |
| 652 | Cough and expectoration for 20 days | Lung CT shows that there is a high possibility of tuberculosis with multiple cavities in both lungs | Negative | Negative | Positive | NA | Positive | Non drug resistance | Primary treatment | Confirmed active case |
| 653 | Lung shadow for 1 week | Lung CT showed a cavity in the posterior wall of the right upper lung | Negative | Positive | Positive | NA | Positive | Isoniazid | Primary treatment | Confirmed active case |
| 654 | Cough for 1 week | Lung CT showed tuberculosis in both lungs with cavity in the left upper lung | One sputum smears were positive. | Positive | Positive | NA | Positive | Non drug resistance | Primary treatment | Confirmed active case |
| 655 | Fever for 1 month | Lung CT showed strip-like high-density shadow in the upper lobe of the right lung | Negative | Positive | Positive | NA | Positive | Non drug resistance | Primary treatment | Confirmed active case |
| 656 | Cough, expectoration and chest tightness for 2 months | Lung CT showed diffuse infectious lesions and local cavity formation in the left lung | One sputum smears were positive. | Positive | Positive | NA | Positive | Non drug resistance | Primary treatment | Confirmed active case |
| 657 | Cough and expectoration for 10 days | Lung CT showed that there was a high possibility of tuberculosis in both lungs and there was a cavity in the right upper lung | Negative | Negative | Positive | NA | Positive | Non drug resistance | Primary treatment | Confirmed active case |
| 658 | Cough and expectoration for 1 year | Lung CT showed multiple micro nodules in both lungs | One sputum smears were positive. | Positive | Positive | NA | Positive | Non drug resistance | Primary treatment | Confirmed active case |
| 659 | Hemoptysis for 1 day | Lung CT showed that there was increased density of scattered spots in both lungs | Negative | Negative | Positive | NA | Positive | Non drug resistance | Primary treatment | Confirmed active case |
| 660 | Cough and expectoration for 3 days | Lung CT showed tuberculosis in the lower right lung | Negative | Negative | Positive | NA | Positive | Non drug resistance | Primary treatment | Confirmed active case |
| 661 | Cough and expectoration for half a year | Lung CT showed scattered spots and patches of increased density shadow in both lungs | One sputum smears were positive. | Positive | Positive | NA | Positive | Non drug resistance | Primary treatment | Confirmed active case |
| 662 | Cough and expectoration for 20 days | Lung CT showed multiple spots and nodules in both lungs. Tuberculosis should be considered first | One sputum smears were positive. | Positive | Positive | NA | NA | Non drug resistance | Primary treatment | Confirmed active case |
| 663 | Cough and expectoration for 5 days | Lung CT showed chestnut granular tuberculosis in both lungs | Negative | Positive | Positive | NA | NA | Non drug resistance | Primary treatment | Confirmed active case |
| 664 | Fever for 1 week | Lung CT showed tuberculosis in the left lung | Negative | Negative | Positive | NA | Positive | Non drug resistance | Primary treatment | Confirmed active case |
| 665 | Cough and expectoration for 2 weeks | Lung CT showed patches and speckles in both lungs and large consolidation with cavities in the right upper lung | Two sputum smears were positive. | Positive | Positive | NA | Positive | Non drug resistance | Primary treatment | Confirmed active case |
| 666 | Cough and expectoration with fever for 1 month | Lung CT showed that it may be tuberculosis in both lungs | Negative | Negative | Positive | NA | Positive | Non drug resistance | Primary treatment | Confirmed active case |
| 667 | Cough, expectoration and hemoptysis for 6 days | Lung CT showed tuberculosis in the left lung with the formation of cavity in the lower lobe of the left lung | One sputum smears were positive. | Positive | Positive | NA | Positive | Isoniazid | Primary treatment | Confirmed active case |
| 668 | Cough and expectoration for 1 week | Lung CT showed plaques in the dorsal segment of the left lower lung | Negative | Positive | Positive | NA | NA | Non drug resistance | Primary treatment | Confirmed active case |
| 669 | Cough and expectoration for 9 months | Lung CT showed fibroproliferative foci in the upper left lung and exudative shadows in the lower left lung | One sputum smears were positive. | Positive | Positive | NA | NA | Non drug resistance | Primary treatment | Confirmed active case |
| 670 | Cough and expectoration for 1 month | Lung CT showed that there was a high possibility of tuberculosis in both lungs | Two sputum smears were positive. | Positive | Positive | NA | Positive | Non drug resistance | Primary treatment | Confirmed active case |
| 671 | Cough and expectoration for 1 year | Lung CT showed consolidation with atelectasis in the left upper lung | Two sputum smears were positive. | Positive | Positive | NA | Positive | Non drug resistance | Primary treatment | Confirmed active case |
| 672 | Cough and expectoration for 4 months | Lung CT showed scattered infection in the middle lobe of the right lung and left lung | Three sputum smears were positive. | Positive | Positive | NA | Positive | Streptomycin | Primary treatment | Confirmed active case |
| 673 | Cough and expectoration for 2 months | Lung CT showed infectious lesions in the middle lobe of the right lung. Tuberculosis should be considered | Negative | Negative | Positive | NA | NA | Non drug resistance | Primary treatment | Confirmed active case |
| 674 | Anti tuberculosis treatment for 5 months | Lung CT showed that there may be tuberculosis in both lungs with cavities in both upper lungs | Negative | Negative | Positive | NA | NA | Non drug resistance | Primary treatment | Confirmed active case |
| 675 | Cough and expectoration and sputum blood for 3 months | Lung CT showed multiple small nodules in both lungs | Three sputum smears were positive. | Positive | Positive | NA | NA | Streptomycin | Primary treatment | Confirmed active case |
| 676 | Cough and expectoration for 3 months | Lung CT showed multiple cavities in both lungs | One sputum smears were positive. | Positive | Positive | NA | Positive | Non drug resistance | Retreatment | Confirmed active case |
| 677 | Cough and expectoration and blood in sputum for 2 months | Lung CT showed infectious lesions in both lungs, which may be pulmonary tuberculosis | Negative | Positive | Positive | NA | NA | Non drug resistance | Primary treatment | Confirmed active case |
| 678 | Cough and expectoration and sputum blood for 1 week | Lung CT showed patches and spots in the upper lobe of both lungs and the lower lobe of the right lung | Negative | Positive | Positive | NA | NA | Non drug resistance | Primary treatment | Confirmed active case |
| 679 | Cough and expectoration for 3 weeks | Lung CT showed patchy shadow with cavity formation in the left upper lung | Three sputum smears were positive. | Positive | Positive | NA | Negative | Streptomycin, rifampicin | Primary treatment | Confirmed active case |
| 680 | Lung shadow for 21 days | Lung CT showed that there were infectious lesions in both lungs, and tuberculosis was considered to be discharged | One sputum smears were positive. | Positive | Positive | NA | NA | Non drug resistance | Primary treatment | Confirmed active case |
| 681 | Lung shadow for 9 days | Lung CT showed scattered patches of high-density shadow in the left upper lung | Negative | Negative | Positive | NA | NA | Non drug resistance | Primary treatment | Confirmed active case |
| 682 | Cough and expectoration for 2 months | Lung CT showed patchy shadows in the upper lobe of the left lung with cavities and small patchy shadows in the right lung | Three sputum smears were positive. | Positive | Positive | NA | Positive | Non drug resistance | Primary treatment | Confirmed active case |
| 683 | Cough and expectoration for half a year | Lung CT showed tuberculosis in the upper lobe of the right lung and the lower lobe of the left lung | Negative | Positive | Positive | NA | Positive | Non drug resistance | Primary treatment | Confirmed active case |
| 684 | Cough and expectoration for 1 month with blood in sputum for 8 days | Lung CT showed nodules and patchy shadows in the lower lobe of the right and left lungs. Tuberculosis should be excluded | Negative | Positive | Positive | NA | NA | Non drug resistance | Primary treatment | Confirmed active case |
| 685 | Hemoptysis for 2 weeks | Lung CT showed infectious lesions in the lower lobe of the right lung. Tuberculosis should be considered | Negative | Positive | Positive | NA | Positive | Non drug resistance | Primary treatment | Confirmed active case |
| 686 | Lung shadow for 5 days | Lung CT showed that there was nodular cord shadow in the right lung, which may be tuberculosis | Negative | Negative | Positive | NA | Positive | Non drug resistance | Primary treatment | Confirmed active case |
| 687 | Cough and expectoration for 1 month | Lung CT showed that there were nodules and bands in the right lung, which may be tuberculosis | Negative | Positive | Positive | NA | Positive | Non drug resistance | Primary treatment | Confirmed active case |
| 688 | Cough and expectoration with blood in sputum for 20 days | Lung CT showed mass, nodular and spotted increased density shadow and cavity formation in both lungs | One sputum smears were positive. | Positive | Positive | NA | Positive | Non drug resistance | Primary treatment | Confirmed active case |
| 689 | Cough for 1 week | Lung CT showed multiple patches and nodular high-density shadows in the upper lobe and middle lobe of the right lung, and small cavity shadows in the upper lobe of the right lung | Negative | Positive | Positive | NA | Positive | Non drug resistance | Primary treatment | Confirmed active case |
| 690 | Cough and expectoration with sputum and blood for 5 days | Lung CT showed patchy shadows and cavities in the right lung | Negative | Positive | Positive | NA | Positive | Non drug resistance | Primary treatment | Confirmed active case |
| 691 | Right neck mass for 2 months | Lung CT showed scattered small nodules in both lungs | Negative | Negative | Positive | The tissues were positive for Mycobacterium tuberculosis DNA and X-Pert | NA | Streptomycin, rifampicin | Primary treatment | Confirmed active case |
| 692 | Cough and expectoration for 10 days | Lung CT showed multiple patchy and nodular high-density shadows in both lungs | One sputum smears were positive. | Positive | Positive | NA | NA | Non drug resistance | Primary treatment | Confirmed active case |
| 693 | Cough and expectoration for 1 year | Lung CT showed tuberculosis in both lungs | Negative | Positive | Positive | NA | NA | Rifampicin | Primary treatment | Confirmed active case |
| 694 | Cough and expectoration for 20 days | Lung CT showed infectious lesions in both lungs, which may be tuberculosis | Two sputum smears were positive. | Positive | Positive | NA | Positive | Streptomycin, rifampicin | Primary treatment | Confirmed active case |
| 695 | Cough and expectoration and blood in sputum for 10 days | Lung CT showed scattered infectious lesions in both lungs | One sputum smears were positive. | Positive | Positive | NA | NA | Non drug resistance | Primary treatment | Confirmed active case |
| 696 | Cough and expectoration for 4 months | Lung CT showed tuberculosis in both lungs and cavity in the left lung | One sputum smears were positive. | Positive | Positive | NA | Positive | Isoniazid, rifampicin, streptomycin, fuquinolone | Primary treatment | Confirmed active case |
| 697 | Cough, expectoration and fever for 2 weeks | Lung CT showed diffuse lesions in both lungs, and the possibility of tuberculosis was high | Negative | Positive | Positive | NA | NA | Non drug resistance | Primary treatment | Confirmed active case |
| 698 | Cough and expectoration for 1 year | Lung CT showed infection or tuberculosis in the upper lobe of the right lung | Negative | Negative | Positive | NA | Positive | Non drug resistance | Primary treatment | Confirmed active case |
| 699 | Cough and expectoration for 1 year | Lung CT showed that tuberculosis was the first consideration in both lungs | Negative | Positive | Positive | NA | NA | Non drug resistance | Primary treatment | Confirmed active case |
| 700 | Cough and expectoration for 1 month | Lung CT showed tuberculosis in both lungs | One sputum smears were positive. | Positive | Positive | NA | NA | Isoniazid, rifampicin, streptomycin, fuquinolone | Primary treatment | Confirmed active case |
| 701 | Cough, expectoration and hemoptysis for 4 years | Lung CT showed infection in both lungs with multiple cavity formation | Negative | Positive | Positive | NA | NA | Streptomycin, rifampicin, isoniazid | Retreatment | Confirmed active case |
| 702 | Cough and expectoration for 3 months | Lung CT showed nodular and strip-shaped high-density shadows in the upper lobe of the left lung, and scattered strip-shaped and nodular high-density shadows in both lungs | Negative | Positive | Positive | NA | Positive | Non drug resistance | Primary treatment | Confirmed active case |
| 703 | Cough and expectoration for 5 months | Lung CT showed multiple patchy shadows in both lungs | One sputum smears were positive. | Positive | Positive | NA | Positive | Non drug resistance | Primary treatment | Confirmed active case |
| 704 | Cough for 4 months | Lung CT showed multiple micro nodules in both lungs | One sputum smears were positive. | Positive | Positive | NA | NA | Non drug resistance | Primary treatment | Confirmed active case |
| 705 | Chest pain for 4 months | Lung CT showed an infection in the right lung, which may be tuberculosis | Negative | Negative | Positive | NA | NA | Non drug resistance | Primary treatment | Confirmed active case |
| 706 | Cough and expectoration with shortness of breath for 3 months | Lung CT showed that there were infectious lesions and partial consolidation in both lungs, so tuberculosis should be excluded | One sputum smears were positive. | Positive | Positive | NA | Positive | Non drug resistance | Primary treatment | Confirmed active case |
| 707 | Cough and expectoration for half a month | Lung CT showed tuberculosis in both lungs | One sputum smears were positive. | NA | Positive | NA | NA | NA | Primary treatment | Confirmed active case |
| 708 | Cough and expectoration for 4 months | Lung CT showed patchy shadows in both lungs and large consolidation shadows in the right lower lung | One sputum smears were positive. | Positive | Positive | NA | Positive | Non drug resistance | Primary treatment | Confirmed active case |
| 709 | Cough and expectoration for 2 months | Lung CT showed tuberculosis in both lungs | Negative | Positive | Negative | NA | NA | Rifampicin, isoniazid, ethambutol | Retreatment | Confirmed active case |
| 710 | Cough and expectoration for 2 months | Lung CT showed tuberculosis in both lungs | Three sputum smears were positive. | Positive | NA | NA | NA | Streptomycin | Primary treatment | Confirmed active case |
| 711 | Cough, expectoration and hemoptysis for 3 months | Lung CT showed soft tissue density mass with cavity in the upper lobe of the left lung | One sputum smears were positive. | Positive | Positive | NA | NA | Isoniazid | Primary treatment | Confirmed active case |
| 712 | Cough and expectoration for 3 months and hemoptysis for 1 week | Lung CT showed tuberculosis in both lungs and damage in the left lung | Negative | Positive | Positive | NA | NA | Streptomycin, rifampicin, isoniazid, ethambutol | Retreatment | Confirmed active case |
| 713 | Lung shadow | Lung CT showed tuberculosis with cavity formation in the lower lobe of the right lung | Negative | Negative | Positive | NA | Positive | Non drug resistance | Primary treatment | Confirmed active case |
| 714 | Cough and expectoration for 2 days | Lung CT showed multiple patchy shadows in both lungs | Three sputum smears were positive. | Positive | Positive | NA | Positive | Non drug resistance | Primary treatment | Confirmed active case |
| 715 | Cough and expectoration for half a month | Lung CT showed scattered nodules and patchy high-density shadows in both lungs | Negative | Positive | Positive | NA | Negative | Non drug resistance | Primary treatment | Confirmed active case |
| 716 | Cough and expectoration for 2 years | Lung CT showed local bronchiolitis in the upper lobe of the left lung | One sputum smears were positive. | Positive | Positive | NA | NA | Non drug resistance | Primary treatment | Confirmed active case |
| 717 | Cough and expectoration for 2 months | Lung CT showed that there was infection in both lungs with multiple cavity formation, which may be tuberculosis | Negative | Positive | Positive | NA | NA | Streptomycin, rifampicin, isoniazid, ethambutol | Primary treatment | Confirmed active case |
| 718 | Cough and expectoration for 2 months | Lung CT showed tuberculosis with cavity formation in both lungs | One sputum smears were positive. | Positive | Positive | NA | NA | Rifampicin, isoniazid | Primary treatment | Confirmed active case |
| 719 | Cough and expectoration for 1 week | Lung CT showed scattered spots and tiny nodular density increasing shadows in both lungs | Negative | Negative | Positive | NA | Negative | NA | Primary treatment | Confirmed active case |
| 720 | Cough and expectoration for 1 month | Lung CT showed multiple chronic inflammation in the right lower lung and left upper lung | One sputum smears were positive. | Positive | Positive | NA | NA | Non drug resistance | Primary treatment | Confirmed active case |
| 721 | Chest pain for 20 days | Lung CT showed infectious lesions in the upper lobe of the right lung, which may be tuberculosis | Negative | Negative | Positive | NA | Positive | Non drug resistance | Primary treatment | Confirmed active case |
| 722 | Low back pain for 10 months | Lung CT showed acute blood group disseminated pulmonary tuberculosis in both lungs | Negative | Positive | Positive | NA | Positive | Non drug resistance | Primary treatment | Confirmed active case |
| 723 | Cough and expectoration for half a year | Lung CT showed tuberculosis in both lungs | Negative | Positive | Positive | NA | NA | Non drug resistance | Primary treatment | Confirmed active case |
| 724 | Cough and expectoration for 20 days | Lung CT showed tuberculosis in both lungs | Three sputum smears were positive. | Positive | Positive | NA | NA | Non drug resistance | Primary treatment | Confirmed active case |
| 725 | Cough and expectoration for 2 months | Lung CT showed scattered patches and punctate high-density shadows in both lungs | Negative | Positive | Positive | NA | Positive | Rifampicin, isoniazid, ethambutol | Primary treatment | Confirmed active case |
| 726 | Lung shadow for 20 days | Lung CT showed tuberculosis in both lungs | Negative | Positive | Positive | NA | Positive | Streptomycin, rifampicin, isoniazid | Primary treatment | Confirmed active case |
| 727 | Cough and expectoration for 1 month | Lung CT showed tuberculosis in both lungs with the formation of cavity in the upper lobe of the right lung | One sputum smears were positive. | Positive | Positive | NA | NA | Streptomycin, rifampicin | Primary treatment | Confirmed active case |
| 728 | Cough and expectoration for 8 years | Lung CT showed tuberculosis with cavity in both lungs and damage to the right lung | One sputum smears were positive. | Positive | Positive | NA | NA | Non drug resistance | Retreatment | Confirmed active case |
| 729 | Cough and expectoration for 2 months | Lung CT showed multiple plaques and spotted shadows in both lungs | Two sputum smears were positive. | Positive | Positive | NA | NA | Non drug resistance | Primary treatment | Confirmed active case |
| 730 | Cough and expectoration for half a month | Lung CT showed tuberculosis in both lungs with cavity formation in the left lower lung | Negative | Negative | Positive | NA | NA | Non drug resistance | Primary treatment | Confirmed active case |
| 731 | Cough and expectoration for half a month | Lung CT showed tuberculosis in both lungs with cavity formation in the right upper lung | Negative | Positive | Positive | NA | NA | Rifampicin | Primary treatment | Confirmed active case |
| 732 | Lung shadow for 1 week | Lung CT showed tuberculosis with cavity in the lower lobe of the left lung | Negative | Negative | Positive | NA | NA | Non drug resistance | Primary treatment | Confirmed active case |
| 733 | Cough and expectoration for 5 months | Lung CT showed tuberculosis in both lungs | Negative | Negative | Positive | NA | NA | Rifampicin, isoniazid | Primary treatment | Confirmed active case |
| 734 | Cough and expectoration for 10 days | Lung CT showed infection in both lungs. It is considered to be pulmonary tuberculosis | Negative | Positive | Positive | NA | NA | Non drug resistance | Primary treatment | Confirmed active case |
| 735 | Dry cough for 1 week | Lung CT showed diffuse chestnut shadow in both lungs | NA | NA | Positive | NA | NA | Non drug resistance | Primary treatment | Confirmed active case |
| 736 | Lung shadow for more than 7 months | Lung CT showed tuberculosis in both lungs and tuberculosis in the left lower pleura | NA | Negative | Positive | NA | NA | Non drug resistance | Primary treatment | Confirmed active case |
| 737 | Cough and expectoration with 20 days | Pulmonary CT showed tuberculosis in both lungs with cavity formation in the left upper lung | Two sputum smears were positive. | Positive | Positive | NA | NA | Non drug resistance | Primary treatment | Confirmed active case |
| 738 | Cough and expectoration for 9 months | Lung CT showed tuberculosis in both lungs | Negative | Negative | Positive | NA | NA | Non drug resistance | Primary treatment | Confirmed active case |
| 739 | Cough and expectoration for 10 days | Lung CT showed patchy and cord like high-density shadows in the upper lobe of the right lung and tuberculosis in the upper lobe of the right lung | Negative | Negative | Positive | NA | NA | Non drug resistance | Primary treatment | Confirmed active case |
| 740 | Cough and expectoration for 2 months | Lung CT showed tuberculosis in both lungs with cavity formation | One sputum smears were positive. | Positive | Positive | NA | Positive | Non drug resistance | Primary treatment | Confirmed active case |
| 741 | Lung shadow for 2 months | Lung CT showed infection in the upper lobes of both lungs. Tuberculosis should be considered first | Negative | Negative | Positive | NA | NA | Non drug resistance | Primary treatment | Confirmed active case |
| 742 | Cough and expectoration for 2 months | Lung CT showed infectious lesions in the right lung, which is considered to be tuberculosis | Negative | Negative | Positive | NA | NA | Streptomycin, rifampicin, isoniazid | Primary treatment | Confirmed active case |
| 743 | Cough and expectoration for 2 months | Lung CT showed multiple patchy high-density shadows in both lungs and cavity formation in the upper lobe of the right lung | Two sputum smears were positive. | Positive | Positive | NA | NA | Non drug resistance | Primary treatment | Confirmed active case |
| 744 | Cough and expectoration for 1 year | Lung CT showed multiple patchy density increasing shadows and multiple cavities in both lungs | Two sputum smears were positive. | Positive | Positive | NA | NA | Rifampicin, isoniazid | Primary treatment | Confirmed active case |
| 745 | Cough and expectoration for 1 month | Lung CT showed tuberculosis in both lungs with the formation of cavity in the upper lobe of the right lung | Negative | NA | Positive | NA | NA | Non drug resistance | Primary treatment | Confirmed active case |
| 746 | Cough and expectoration for 3 years | Lung CT showed tuberculosis in both lungs | Negative | Positive | Positive | NA | NA | Rifampicin, isoniazid | Primary treatment | Confirmed active case |
| 747 | Cough and expectoration for 7 months | Lung CT showed tuberculosis in the right lung with cavity formation in the right upper lung | Negative | Positive | Positive | NA | NA | Rifampicin | Primary treatment | Confirmed active case |
| 748 | Cough and expectoration for 1 month | Lung CT shows that it may be tuberculosis | Negative | Positive | Positive | NA | Positive | Non drug resistance | Primary treatment | Confirmed active case |
| 749 | Cough and expectoration for 1 month | Lung CT showed tuberculosis in both lungs | NA | Positive | Positive | NA | NA | Non drug resistance | Retreatment | Confirmed active case |
| 750 | Cough and expectoration and fatigue for 2 years | Lung CT showed that there may be tuberculosis with cavity in both lungs | Three sputum smears were positive. | Positive | Positive | NA | NA | Rifampicin, isoniazid | Retreatment | Confirmed active case |
| 751 | Cough and expectoration for 2 months | Lung CT showed extensive tuberculosis in both lungs | Negative | Positive | Positive | NA | NA | Non drug resistance | Primary treatment | Confirmed active case |
| 752 | Cough and expectoration for more than 6 months | Lung CT showed infection in both lungs, which may be pulmonary tuberculosis | One sputum smears were positive. | Positive | Positive | NA | Positive | Non drug resistance | Primary treatment | Confirmed active case |
| 753 | Tuberculosis for 5 months | Lung CT showed tuberculosis in the left upper lobe | Negative | Positive | Positive | NA | NA | Streptomycin, rifampicin, isoniazid, ethambutol | Primary treatment | Confirmed active case |
| 754 | Cough and expectoration for half a year | Lung CT showed that there was a high possibility of tuberculosis in both lungs | Negative | Positive | Positive | NA | NA | Rifampicin, isoniazid | Primary treatment | Confirmed active case |
| 755 | Cough, expectoration and hematemesis for 1 day | Lung CT showed extensive chestnut shadow on both lungs | Negative | Positive | Positive | NA | Positive | Non drug resistance | Primary treatment | Confirmed active case |
| 756 | Cough and expectoration for 1 month and hemoptysis for 3 days | Lung CT showed tuberculosis in both lungs with cavity formation in the right upper lung | Negative | Positive | Positive | NA | NA | Rifampicin | Primary treatment | Confirmed active case |
| 757 | Cough and expectoration for 3 months | Lung CT showed tuberculosis in both lungs | Negative | Positive | Positive | NA | NA | Non drug resistance | Primary treatment | Confirmed active case |
| 758 | Lung shadow for 6 days | Lung CT showed that there were multiple infections in the upper lobe of both lungs and the dorsal segment of the lower lobe of the right lung, so tuberculosis should be excluded | Negative | Positive | Positive | NA | NA | Non drug resistance | Primary treatment | Confirmed active case |
| 759 | Pulmonary nodules for 1 month | Lung CT showed tuberculosis in both lungs | Negative | Negative | Positive | NA | NA | Rifampicin | Primary treatment | Confirmed active case |
| 760 | Cough and expectoration for 3 months | Lung CT showed multiple exudative nodule shadows in the right lung | One sputum smears were positive. | Positive | Positive | NA | NA | Non drug resistance | Primary treatment | Confirmed active case |
| 761 | Cough and expectoration for 1 year | Lung CT shows pulmonary shadow, tuberculosis is the first consideration | Negative | Negative | Positive | NA | NA | Non drug resistance | Primary treatment | Confirmed active case |
| 762 | Cough and expectoration for 5 years | Lung CT showed multiple nodule shadows in both lungs | One sputum smears were positive. | Positive | Positive | NA | NA | Rifampicin | Primary treatment | Confirmed active case |
| 763 | Cough and expectoration for 1 year | Lung CT showed punctate and nodular density height shadows in the lower lobes of both lungs | One sputum smears were positive. | Positive | Positive | NA | Positive | Non drug resistance | Primary treatment | Confirmed active case |
| 764 | Cough, expectoration and fever for 20 days | Lung CT showed infectious lesions with consolidation in the middle and lower lobe of the right lung | One sputum smears were positive. | Positive | Positive | NA | NA | Non drug resistance | Primary treatment | Confirmed active case |
| 765 | Fever and hemoptysis for half a month | Lung CT showed scattered patches and cavity shadows in the right upper lung | One sputum smears were positive. | Positive | Positive | NA | NA | Streptomycin, rifampicin, isoniazid, ethambutol | Primary treatment | Confirmed active case |
| 766 | Cough and expectoration for 1 month | Lung CT showed tuberculosis in both lungs with the formation of small cavities in the lower right lung | Negative | Positive | Positive | NA | NA | Rifampicin | Primary treatment | Confirmed active case |
| 767 | Fever for 9 days | Lung CT showed pulmonary infection and pulmonary tuberculosis to be discharged | Negative | Positive | Positive | NA | NA | Rifampicin | Primary treatment | Confirmed active case |
| 768 | Cough and expectoration for one and a half months | Lung CT showed tuberculosis in both lungs with cavity in the right upper lung | Negative | Positive | Positive | NA | NA | Rifampicin, isoniazid | Primary treatment | Confirmed active case |
| 769 | Fever for 20 days | Lung CT showed tuberculosis with infection in both lungs | Negative | Positive | Positive | NA | Positive | Streptomycin, rifampicin, isoniazid | Primary treatment | Confirmed active case |
| 770 | Cough and expectoration for 1 month | Lung CT showed that there were infectious lesions in the lungs, and pulmonary tuberculosis was to be discharged | Negative | Positive | Positive | NA | Positive | Non drug resistance | Primary treatment | Confirmed active case |
| 771 | Cough and expectoration for 1 month | Lung CT showed lesions in the right upper lung, which is considered to be old tuberculosis | Negative | Negative | Negative | The tissues were positive for Mycobacterium tuberculosis DNA . | NA | Non drug resistance | Primary treatment | Confirmed active case |
| 772 | Chest tightness and shortness of breath for 1 day | Lung CT showed possible tuberculosis in both lungs | Negative | Positive | Positive | NA | Positive | Rifampicin, isoniazid | Retreatment | Confirmed active case |
| 773 | Cough and expectoration for 10 days | Lung CT showed that the first consideration was tuberculosis in both lungs | Negative | Negative | Positive | NA | Positive | Non drug resistance | Retreatment | Confirmed active case |
| 774 | Cough, expectoration and fever for half a month | Lung CT showed that there were spots and nodules in the right upper lung and scattered spots and patches in both lungs | One sputum smears were positive. | Positive | Positive | NA | NA | Rifampicin, isoniazid | Primary treatment | Confirmed active case |
| 775 | Lung shadow for 1 month | Lung CT showed tuberculosis in both lungs with multiple cavities in the right upper lung | One sputum smears were positive. | Positive | NA | NA | NA | Streptomycin, rifampicin, isoniazid, ethambutol | Primary treatment | Confirmed active case |
| 776 | Cough and expectoration for half a year | Lung CT showed that tuberculosis was the first consideration in both lungs | Negative | Positive | Negative | NA | NA | Non drug resistance | Primary treatment | Confirmed active case |
| 777 | Fever for 2 days | Lung CT showed diffuse speckled exudative shadow in both lungs, and tuberculosis should be excluded | Negative | Positive | Positive | NA | Positive | Non drug resistance | Primary treatment | Confirmed active case |
| 778 | Cough and cough for half a month | Lung CT showed tuberculosis with cavity in both lungs | One sputum smears were positive. | Positive | Positive | NA | NA | Non drug resistance | Primary treatment | Confirmed active case |
| 779 | Cough and expectoration for 3 months | Lung CT showed consolidation with cavity formation in the middle lobe of the right lung | One sputum smears were positive. | Positive | Positive | NA | NA | Non drug resistance | Primary treatment | Confirmed active case |
| 780 | Cough and expectoration for 1 month | Lung CT showed nodular shadow in the lower lobe of the right lung and exudative shadow in the upper lobe of the left lung | Three sputum smears were positive. | Positive | Positive | NA | NA | Rifampicin, isoniazid | Retreatment | Confirmed active case |
| 781 | Hemoptysis for 10 days | Lung CT showed tuberculosis with cavity formation in both lungs | Negative | Positive | Positive | NA | NA | Rifampicin, isoniazid, fluoroquinolone | Primary treatment | Confirmed active case |
| 782 | Cough and expectoration for 2 months | Lung CT showed tuberculosis in both lungs | Negative | Negative | Positive | NA | NA | NA | Primary treatment | Confirmed active case |
| 783 | Cough and expectoration for 4 years | Lung CT showed scattered patchy increased density shadow in the right lung | Negative | Positive | Positive | NA | NA | Non drug resistance | Primary treatment | Confirmed active case |
| 784 | Cough and expectoration for 30 years | Lung CT showed irregular patches and cord like shadows in both lungs | Negative | Positive | Positive | NA | NA | Non drug resistance | Primary treatment | Confirmed active case |
| 785 | Cough and expectoration for 7 months | Lung CT showed that tuberculosis was the first consideration in the upper lobe of the left lung | Negative | Negative | Positive | NA | NA | Rifampicin | Primary treatment | Confirmed active case |
| 786 | Cough and expectoration for 1 month | Lung CT showed spots, spots and strips of high-density shadow in the left lung | Negative | Positive | Positive | NA | NA | Streptomycin, rifampicin, isoniazid | Primary treatment | Confirmed active case |
| 787 | Cough and expectoration for 1 month | Lung CT showed lesions in the upper lobe of the right lung and scattered fibroproliferative foci in both lungs | Negative | Positive | Positive | NA | NA | Rifampicin, isoniazid | Primary treatment | Confirmed active case |
| 788 | Cough, expectoration and sputum blood for 1 week | Lung CT showed scattered patches and speckled increased density shadows in the upper, middle, lower and upper right of the left lung, and there was cavity formation in the upper left lung | Three sputum smears were positive. | Positive | Positive | NA | NA | Rifampicin, isoniazid | Retreatment | Confirmed active case |
| 789 | Cough and expectoration for 10 days | Lung CT showed tuberculosis in both lungs | One sputum smears were positive. | Positive | Positive | NA | Positive | Non drug resistance | Primary treatment | Confirmed active case |
| 790 | Cough and expectoration for 8 months | Lung CT showed tuberculosis in the right lung | Three sputum smears were positive. | Positive | Positive | NA | NA | Streptomycin, rifampicin, isoniazid | Retreatment | Confirmed active case |
| 791 | Cough and expectoration and fever for 20 days | Lung CT showed tuberculosis in both lungs | One sputum smears were positive. | Positive | Positive | NA | NA | Non drug resistance | Primary treatment | Confirmed active case |
| 792 | Hemoptysis for 2 months | Lung CT showed tuberculosis in both lungs | NA | Positive | Positive | NA | NA | Rifampicin, isoniazid | Primary treatment | Confirmed active case |
| 793 | Cough and expectoration for 1 year | Lung CT showed that it may be tuberculosis in both lungs | Negative | Positive | Positive | NA | Positive | Non drug resistance | Primary treatment | Confirmed active case |
| 794 | Cough and expectoration for 6 days | Lung CT showed patchy shadows in the right upper lung | Negative | Positive | Positive | NA | Positive | Rifampicin | Primary treatment | Confirmed active case |
| 795 | Cough and expectoration for 2 months | Lung CT showed tuberculosis in both lungs with multiple cavities | One sputum smears were positive. | Positive | Positive | NA | Negative | Isoniazid, rifampicin, streptomycin, fuquinolone | Retreatment | Confirmed active case |
| 796 | Cough and expectoration for 20 days | Lung CT showed diffuse lesions in both lungs and cavities in the upper lobe of the right lung | Three sputum smears were positive. | Positive | Positive | NA | Positive | Rifampicin, isoniazid, fluoroquinolone | Primary treatment | Confirmed active case |
| 797 | NA | Lung CT showed tuberculosis in both lungs and a small number of new lesions in the right lower lung with cavity formation | One sputum smears were positive. | Positive | Positive | NA | NA | Rifampicin | Primary treatment | Confirmed active case |
| 798 | Cough and expectoration for 1 month | Lung CT showed tuberculosis in the upper lobe of the right lung | Negative | Positive | Positive | NA | Positive | Non drug resistance | Primary treatment | Confirmed active case |
| 799 | Cough and expectoration for 1 month | Lung CT showed tuberculosis with local cavity formation in both lungs | One sputum smears were positive. | Positive | Positive | NA | NA | Non drug resistance | Primary treatment | Confirmed active case |
| 800 | Lung shadow for 3 days | Lung CT showed tuberculosis in both lungs | Negative | Negative | Positive | NA | Positive | Streptomycin, rifampicin | Primary treatment | Confirmed active case |
| 801 | Fever for 1 week | Lung CT showed that there may be tuberculosis with cavity in both lungs | One sputum smears were positive. | Positive | Positive | NA | NA | Non drug resistance | Primary treatment | Confirmed active case |
| 802 | Cough for 1 week | Lung CT showed patches and consolidation in the upper lobe of the left lung | One sputum smears were positive. | Negative | Positive | NA | Positive | Non drug resistance | Primary treatment | Confirmed active case |
| 803 | Lung shadow for 3 days | Lung CT showed cavity mass and scattered patchy, nodular and cord like high-density shadow in the left lower lung | Negative | Positive | Positive | NA | Positive | Non drug resistance | Primary treatment | Confirmed active case |
| 804 | Hemoptysis for 1 week | Lung CT showed infection in the left lung with cavity formation, which may be tuberculosis | One sputum smears were positive. | Positive | Positive | NA | NA | Rifampicin, isoniazid | Retreatment | Confirmed active case |
| 805 | Cough and fever for 1 month | Lung CT showed consolidation shadow and two lung patches in the left upper lung | Negative | Positive | Positive | NA | NA | Non drug resistance | Primary treatment | Confirmed active case |
| 806 | Cough and expectoration for 1 month | Lung CT showed multiple patches and nodules in both lungs, and there was a cavity in the right upper lung | Negative | Positive | Positive | NA | NA | Non drug resistance | Primary treatment | Confirmed active case |
| 807 | Cough and expectoration for 20 days | Lung CT showed tuberculosis with multiple cavities in both lungs | One sputum smears were positive. | Positive | Positive | NA | NA | Streptomycin, rifampicin, isoniazid, ethambutol | Retreatment | Confirmed active case |
| 808 | Cough and expectoration for 10 days | Lung CT showed tuberculosis in both lungs and secondary consolidation in the left lower lung | One sputum smears were positive. | Positive | Positive | NA | NA | Non drug resistance | Primary treatment | Confirmed active case |
| 809 | Abdominal pain and diarrhea for 1 week | Lung CT showed tuberculosis in both lungs | Negative | Positive | Positive | NA | NA | Rifampicin | Primary treatment | Confirmed active case |
| 810 | Cough and expectoration for 1 month | Lung CT showed that tuberculosis was considered in both lungs | Negative | Negative | Positive | NA | NA | Non drug resistance | Primary treatment | Confirmed active case |
| 811 | Cough and hemoptysis for 3 years | Lung CT showed secondary pulmonary tuberculosis in the upper lobe of the right lung | Negative | Negative | Positive | NA | Positive | Non drug resistance | Primary treatment | Confirmed active case |
| 812 | Cough and expectoration for 1 month | Lung CT showed tuberculosis with cavity in both lungs | Negative | Positive | Positive | NA | Positive | Non drug resistance | Primary treatment | Confirmed active case |
| 813 | Cough and expectoration for 1 month | Lung CT showed tuberculosis in both lungs | One sputum smears were positive. | Positive | Positive | NA | NA | Rifampicin, isoniazid | Primary treatment | Confirmed active case |
| 814 | Cough and expectoration for 2 months | Lung CT showed tuberculosis in both lungs | Three sputum smears were positive. | Positive | Positive | NA | NA | Non drug resistance | Primary treatment | Confirmed active case |
| 815 | Cough and expectoration for 1 month | Lung CT shows that the first consideration is tuberculosis in both lungs | Negative | Positive | Positive | NA | Positive | Non drug resistance | Primary treatment | Confirmed active case |
| 816 | Cough and expectoration and hemoptysis for 10 days | Lung CT showed that there was tuberculosis with cavity in both lu | Two sputum smears were positive. | Positive | Positive | NA | NA | Non drug resistance | Primary treatment | Confirmed active case |
| 817 | Anti tuberculosis treatment for 9 months | Lung CT showed tuberculosis in both lungs | One sputum smears were positive. | Positive | Positive | NA | NA | Streptomycin, rifampicin, isoniazid | Primary treatment | Confirmed active case |
| 818 | Cough and expectoration for 10 years | Lung CT showed consolidation in the lower right lung | One sputum smears were positive. | Positive | Positive | NA | Positive | Non drug resistance | Primary treatment | Confirmed active case |
| 819 | Hoarseness and chest tightness for 10 days | Lung CT showed tuberculosis in both lungs and cavity formation in the left upper lung | Three sputum smears were positive. | Positive | Positive | NA | NA | Rifampicin, isoniazid | Primary treatment | Confirmed active case |
| 820 | Cough and expectoration for 4 months | Lung CT showed tuberculosis in both lungs and consolidation in the right upper lung | Negative | Positive | Positive | NA | NA | Non drug resistance | Primary treatment | Confirmed active case |
| 821 | Cough and expectoration for 2 months | Lung CT showed that there were scattered patches and speckled increased density shadows in both lungs | Negative | Positive | Positive | NA | NA | Streptomycin, rifampicin, isoniazid | Primary treatment | Confirmed active case |
| 822 | Cough and expectoration and blood sputum for 1 year | Lung CT showed patches and nodules in both lungs and cavity shadow in the lower left lung | One sputum smears were positive. | Positive | Negative | NA | NA | Non drug resistance | Primary treatment | Confirmed active case |
| 823 | Dry cough for 2 months | Lung CT showed spots and stripes of density shadow in both lungs | Negative | Positive | Positive | NA | Positive | Non drug resistance | Primary treatment | Confirmed active case |
| 824 | Cough and expectoration for 9 months | Lung CT showed tuberculosis in both lungs with cavity in the right upper lung | One sputum smears were positive. | Positive | Positive | NA | NA | Non drug resistance | Primary treatment | Confirmed active case |
| 825 | Cough and expectoration for 2 years | Lung CT showed nodular and cord like high-density shadows at the right lung tip | Negative | Negative | Positive | NA | NA | Non drug resistance | Primary treatment | Confirmed active case |
| 826 | Hemoptysis for 11 days | Lung CT showed tuberculosis in both lungs with small cavities in the upper right lung | Negative | Positive | Positive | NA | Positive | Streptomycin, rifampicin, isoniazid, ethambutol | Primary treatment | Confirmed active case |
| 827 | Cough and expectoration for half a year | Lung CT showed tuberculosis in both lungs with cavity formation in the right upper lung | One sputum smears were positive. | Positive | Positive | NA | Positive | Rifampicin | Primary treatment | Confirmed active case |
| 828 | Cough and expectoration and blood sputum for 10 days | Lung CT showed multiple patches and nodules in both lungs | One sputum smears were positive. | Positive | Positive | NA | NA | Non drug resistance | Primary treatment | Confirmed active case |
| 829 | Cough, expectoration and fever for 2 months | Lung CT showed patches and nodular high-density shadows in the lower lobe of the right lung | One sputum smears were positive. | NA | Positive | NA | Negative | Non drug resistance | Primary treatment | Confirmed active case |
| 830 | Anti tuberculosis treatment for half a year | Lung CT showed patchy high-density shadows in the upper lobe and lower lobes of the right lung | Negative | Negative | Positive | NA | NA | Non drug resistance | Primary treatment | Confirmed active case |
| 831 | Cough, expectoration and hemoptysis for 6 years | Lung CT showed tuberculosis in both lungs with cavity formation in the right upper lung | One sputum smears were positive. | Positive | Positive | NA | NA | Fluoroquinolone | Primary treatment | Confirmed active case |
| 832 | Cough and expectoration for 4 years | Lung CT showed tuberculosis with cavity formation in both lungs | One sputum smears were positive. | Positive | Positive | NA | NA | Non drug resistance | Primary treatment | Confirmed active case |
| 833 | Lung shadow for 20 days | Lung CT showed scattered patchy shadows in the upper lobe of the left lung and scattered cord shadows and nodule shadows in both lungs | One sputum smears were positive. | Positive | Negative | NA | Positive | Streptomycin, rifampicin, isoniazid, ethambutol | Primary treatment | Confirmed active case |
| 834 | Cough and expectoration for 1 month | Lung CT showed tuberculosis in both lungs with cavity formation in the right upper lung | Negative | Negative | Positive | NA | NA | Streptomycin | Primary treatment | Confirmed active case |
| 835 | Lung shadow for 1 year | Lung CT showed scattered spots and stripes of increased density in both lungs | One sputum smears were positive. | Positive | Positive | NA | NA | Non drug resistance | Primary treatment | Confirmed active case |
| 836 | Cough and expectoration for 2 months | Lung CT showed infectious disease in the middle and lower lobe of the right lung and partial consolidation in the lower lobe of the right lung | One sputum smears were positive. | Positive | Positive | NA | NA | Non drug resistance | Primary treatment | Confirmed active case |
| 837 | Cough and expectoration for 10 days | Lung CT showed that there were dotted strip high-density shadows in the upper lobe of the left lung and nodular high-density shadows in the lower lobe of the left lung | One sputum smears were positive. | Positive | Positive | NA | NA | Non drug resistance | Primary treatment | Confirmed active case |
| 838 | Cough and expectoration for 2 weeks | Lung CT showed tuberculosis in both lungs with possible cavities in both upper lungs | One sputum smears were positive. | Positive | Positive | NA | Positive | Non drug resistance | Primary treatment | Confirmed active case |
| 839 | Cough and expectoration for half a month | Lung CT showed multiple punctate and branched hyperdense shadows in both lungs | One sputum smears were positive. | Positive | Positive | NA | NA | Non drug resistance | Primary treatment | Confirmed active case |
| 840 | Cough and expectoration for half a month | Lung CT showed tuberculosis and secondary cavity formation in both lungs | One sputum smears were positive. | Positive | Positive | NA | NA | Non drug resistance | Primary treatment | Confirmed active case |
| 841 | Cough and expectoration for 2 months | Lung CT showed tuberculosis in both lungs | One sputum smears were positive. | Positive | Positive | NA | Negative | Isoniazid, rifampicin, streptomycin, fuquinolone | Retreatment | Confirmed active case |
| 842 | Lung CT showed tuberculosis in both lungs | Lung CT showed that there were infectious lesions in both lungs, which was considered to be tuberculosis | Negative | Negative | Positive | NA | NA | Streptomycin, rifampicin, isoniazid | Primary treatment | Confirmed active case |
| 843 | Cough and expectoration for 5 months | Lung CT showed tuberculosis in both lungs | One sputum smears were positive. | Positive | Positive | NA | NA | Non drug resistance | Primary treatment | Confirmed active case |
| 844 | Fatigue and anorexia for 4 months | Lung CT showed extensive tuberculosis with extensive cavity formation in both lungs | Three sputum smears were positive. | Positive | Positive | NA | Negative | Non drug resistance | Primary treatment | Confirmed active case |
| 845 | Cough and expectoration for 20 years | Lung CT showed secondary pulmonary tuberculosis | One sputum smears were positive. | Positive | Positive | NA | NA | Rifampicin, isoniazid | Retreatment | Confirmed active case |
| 846 | Cough and expectoration for 2 months | Lung CT showed a patchy shadow in the right upper lung | One sputum smears were positive. | Positive | Positive | NA | NA | Non drug resistance | Primary treatment | Confirmed active case |
| 847 | Cough and expectoration for 20 years | Lung CT showed tuberculosis in both lungs | Three sputum smears were positive. | Positive | Positive | NA | NA | Non drug resistance | Primary treatment | Confirmed active case |
| 848 | Cough and expectoration for 1 year | Lung CT showed spots and strips of density shadows in both lungs and multiple cavities in the left lung | One sputum smears were positive. | Positive | Positive | NA | NA | Non drug resistance | Retreatment | Confirmed active case |
| 849 | Cough and expectoration for 2 weeks | NA | One sputum smears were positive. | Positive | Positive | NA | NA | Rifampicin, isoniazid | Primary treatment | Confirmed active case |
| 850 | Lung shadow for 7 months | Lung CT showed tuberculosis in the left lung | Negative | Positive | Positive | NA | NA | Rifampicin | Retreatment | Confirmed active case |
| 851 | Fever and fatigue for 1 week | Lung CT showed extensive tuberculosis in both lungs | One sputum smears were positive. | Positive | Positive | NA | NA | Non drug resistance | Primary treatment | Confirmed active case |
| 852 | Cough and expectoration for 1 month | Lung CT showed consolidation with multiple nodules in the upper lobe of the right lung | One sputum smears were positive. | Negative | Positive | NA | NA | NA | Primary treatment | Confirmed active case |
| 853 | Lung shadow for 3 days | Lung CT shows that it may be tuberculosis | One sputum smears were positive. | Positive | Positive | NA | Positive | Non drug resistance | Primary treatment | Confirmed active case |
| 854 | Cough for 1 week | Lung CT showed cavity shadow and exudation shadow in the upper lobe of the left lung | One sputum smears were positive. | Positive | Positive | NA | NA | Streptomycin | Primary treatment | Confirmed active case |
| 855 | Lung shadow for 1 month | Lung CT showed tuberculosis in both upper lungs | Negative | Positive | Positive | NA | NA | Fluoroquinolone, rifampicin | Retreatment | Confirmed active case |
| 856 | Cough and expectoration for 20 days | Lung CT showed inflammation in both lower lungs and tuberculosis in the upper right | Negative | Positive | Positive | NA | Positive | Streptomycin, rifampicin, isoniazid | Primary treatment | Confirmed active case |
| 857 | Cough and expectoration for 1.5 years | Lung CT showed tuberculosis with cavity in both lungs | One sputum smears were positive. | Negative | Positive | NA | NA | Non drug resistance | Primary treatment | Confirmed active case |
| 858 | Cough and expectoration for 2 months | Lung CT showed infectious lesions in the middle lobe of the right lung | Two sputum smears were positive. | Positive | Positive | NA | NA | Non drug resistance | Retreatment | Confirmed active case |
| 859 | Cough, expectoration and hemoptysis for 9 months | Lung CT showed multiple nodules in both lungs and nodules in the upper lobe of the right lung | Negative | Negative | Positive | NA | Positive | Non drug resistance | Primary treatment | Confirmed active case |
| 860 | Cough and expectoration for 3 months | Lung CT showed tuberculosis in both lungs | Negative | Negative | Positive | The tissues were positive for Mycobacterium tuberculosis X-Pert | NA | Rifampicin | Primary treatment | Confirmed active case |
| 861 | Cough and Phlegm Blood for 5 months | Lung CT showed tuberculosis in both lungs | Two sputum smears were positive. | Positive | Positive | NA | NA | Rifampicin, isoniazid | Retreatment | Confirmed active case |
| 862 | Cough and expectoration for 6 months | Lung CT showed increased lesions | One sputum smears were positive. | Positive | Positive | NA | Positive | Streptomycin | Primary treatment | Confirmed active case |
| 863 | Cough and expectoration for 5 years | Lung CT showed tuberculosis in both lungs | One sputum smears were positive. | Negative | Positive | NA | NA | Non drug resistance | Primary treatment | Confirmed active case |
| 864 | Cough and expectoration for 10 days | Lung CT showed irregular mass and mottled density shadow in the left upper lung | Negative | Positive | Positive | NA | NA | Rifampicin, isoniazid | Primary treatment | Confirmed active case |
| 865 | Hemoptysis for 3 months | Lung CT showed multiple infections in both lungs with cavity formation, which may be tuberculosis | Two sputum smears were positive. | Positive | Positive | NA | NA | Streptomycin | Primary treatment | Confirmed active case |
| 866 | Cough and expectoration for 2 weeks | Lung CT showed patchy shadows in both lungs | Negative | Positive | Positive | NA | Positive | NA | Retreatment | Confirmed active case |
| 867 | Cough and expectoration for 2 years | Lung CT showed tuberculosis in the right lung and injury in the left lung | One sputum smears were positive. | Positive | Positive | NA | NA | Non drug resistance | Primary treatment | Confirmed active case |
| 868 | Lung shadow for 3 days | Lung CT showed infection in both lungs with cavity formation, which is considered to be tuberculosis | Negative | Negative | Positive | NA | NA | Isoniazid | Primary treatment | Confirmed active case |
| 869 | Cough and expectoration for half a year | Lung CT showed tuberculosis in both lungs | Negative | Positive | Positive | NA | NA | NA | Primary treatment | Confirmed active case |
| 870 | Lung shadow for 2 months | Lung CT showed small nodules and cavities in the upper lobe of the left lung | Negative | Positive | Positive | NA | NA | Non drug resistance | Primary treatment | Confirmed active case |
| 871 | Cough and expectoration for 2 months | Lung CT showed tuberculosis with cavity in both lungs | Two sputum smears were positive. | Positive | NA | NA | NA | Streptomycin, isoniazid | Retreatment | Confirmed active case |
| 872 | Lung CT showed cough and expectoration for half a year and sputum blood for 3 days | Lung CT showed tuberculosis with cavity formation in both lungs | One sputum smears were positive. | Positive | Positive | NA | Positive | Non drug resistance | Primary treatment | Confirmed active case |
| 873 | Cough and expectoration for half a year | Lung CT showed that there were exudative patches and cavity shadows in the right lung and left lower lung | One sputum smears were positive. | Positive | Positive | NA | NA | Streptomycin | Primary treatment | Confirmed active case |
| 874 | Cough and expectoration for 5 months | Lung CT showed tuberculosis in the right lung | Negative | Negative | Positive | NA | NA | Non drug resistance | Primary treatment | Confirmed active case |
| 875 | Cough, expectoration and hemoptysis for 1 year | Lung CT showed patchy and columnar shadows in the left lung and cavitary changes in the upper left lung | One sputum smears were positive. | Positive | Positive | NA | NA | Non drug resistance | Primary treatment | Confirmed active case |
| 876 | Fatigue for 1 week | Lung CT showed tuberculosis in both lungs with cavity in the right upper lung | Negative | Positive | Positive | NA | Negative | Non drug resistance | Primary treatment | Confirmed active case |
| 877 | Cough and expectoration for 1 month | NA | Three sputum smears were positive. | Positive | Positive | NA | NA | Rifampicin, isoniazid | Primary treatment | Confirmed active case |
| 878 | Lung shadow for 4 days | Lung CT showed tuberculosis in the upper lobe of the right lung | Negative | Negative | Positive | NA | Positive | Non drug resistance | Primary treatment | Confirmed active case |
| 879 | Cough and expectoration for 4 months | Lung CT showed tuberculosis in both lungs | Negative | Positive | Positive | NA | NA | Non drug resistance | Primary treatment | Confirmed active case |
| 880 | Cough and expectoration for half a month | Lung CT showed tuberculosis in both lungs | Negative | Negative | Positive | NA | NA | Non drug resistance | Primary treatment | Confirmed active case |
| 881 | Cough and expectoration for 2 years | Lung CT showed tuberculosis in both lungs | Negative | Positive | Positive | NA | NA | Streptomycin, rifampicin, isoniazid | Primary treatment | Confirmed active case |
| 882 | Anti tuberculosis treatment for 1 year | Lung CT showed tuberculosis in both lungs | One sputum smears were positive. | NA | Positive | NA | NA | Non drug resistance | Retreatment | Confirmed active case |
| 883 | Cough and expectoration for 1 year | Lung CT showed infection in both lungs. It is considered to be tuberculosis | One sputum smears were positive. | Positive | Positive | NA | NA | Non drug resistance | Primary treatment | Confirmed active case |
| 884 | Cough, expectoration and fatigue for 1 month | Lung CT showed a small amount of tuberculosis in both lungs | One sputum smears were positive. | Negative | Positive | NA | Positive | Non drug resistance | Primary treatment | Confirmed active case |
| 885 | Cough and expectoration with blood in sputum for half a month | Lung CT showed that pulmonary tuberculosis could not be excluded | Negative | Negative | Positive | NA | Positive | Non drug resistance | Primary treatment | Confirmed active case |
| 886 | Cough and expectoration for 2 months | Lung CT showed tuberculosis with multiple cavities in both lungs | Three sputum smears were positive. | Positive | Positive | NA | Positive | Rifampicin | Primary treatment | Confirmed active case |
| 887 | Cough, expectoration for 1 year and hemoptysis for 3 days | Lung CT showed a large patch shadow with cavity in the right lower lung | Negative | Positive | Positive | NA | Positive | Rifampicin, isoniazid | Retreatment | Confirmed active case |
| 888 | Cough and expectoration for 1 month | Lung CT showed tuberculosis in both lungs and cavity formation in the upper lobe of the left lung | Negative | Positive | Positive | NA | NA | Streptomycin, rifampicin, isoniazid | Primary treatment | Confirmed active case |
| 889 | Cough and expectoration for 1 year | Lung CT showed infection in both lungs. It is considered to be pulmonary tuberculosis | Negative | Positive | Positive | NA | NA | Streptomycin, rifampicin, isoniazid | Primary treatment | Confirmed active case |
| 890 | Lung shadow for one year | Lung CT showed tuberculosis in the upper right lung | Negative | Positive | Positive | NA | NA | Streptomycin, rifampicin, isoniazid | Primary treatment | Confirmed active case |
| 891 | Cough and expectoration for 4 months | Lung CT showed tuberculosis in both lungs | Negative | Positive | NA | NA | NA | NA | Primary treatment | Confirmed active case |
| 892 | Lung shadow for 3 days | Lung CT showed lesions in the lower lobe of the right and left lungs, which may be tuberculosis | NA | NA | Positive | NA | Positive | Non drug resistance | Primary treatment | Confirmed active case |
| 893 | Cough and expectoration for 1 month | Lung CT showed scattered infectious lesions in both lungs and multiple irregular cavities in the upper lobe of the left lung | One sputum smears were positive. | Positive | Positive | NA | NA | Non drug resistance | Primary treatment | Confirmed active case |
| 894 | Cough and expectoration for 2 years and hemoptysis for 2 days | Lung CT showed tuberculosis with cavity in the upper lobe of the right lung | One sputum smears were positive. | Positive | Positive | NA | NA | NA | Primary treatment | Confirmed active case |
| 895 | Cough and expectoration for half a year | Lung CT showed multiple infections in both lungs | One sputum smears were positive. | Positive | Positive | NA | NA | Non drug resistance | Primary treatment | Confirmed active case |
| 896 | Cough and expectoration for 7 months | Lung CT showed tuberculosis in both lungs | NA | Negative | Positive | NA | NA | NA | Primary treatment | Confirmed active case |
| 897 | Cough and expectoration for half a year | Lung CT showed tuberculosis with cavity in both lungs | One sputum smears were positive. | Negative | Positive | NA | NA | Non drug resistance | Primary treatment | Confirmed active case |
| 898 | Cough and expectoration for 1 month | Lung CT showed tuberculosis in both lungs with cavity formation in the lower right lung | One sputum smears were positive. | Positive | Positive | NA | NA | Non drug resistance | Primary treatment | Confirmed active case |
| 899 | Cough and expectoration for 1 month | Pulmonary CT showed tuberculosis with cavity in the left lower lung | One sputum smears were positive. | Negative | Positive | NA | NA | Non drug resistance | Primary treatment | Confirmed active case |
| 900 | Cough and expectoration for half a month | Lung CT showed consolidation in the upper lobe of the right lung | One sputum smears were positive. | Positive | Positive | NA | NA | Non drug resistance | Primary treatment | Confirmed active case |
| 901 | Cough and expectoration and sputum blood for 5 days | Lung CT showed possible tuberculosis in the lower lobe of the left lung | Negative | Positive | Positive | NA | NA | Non drug resistance | Primary treatment | Confirmed active case |
| 902 | Cough and expectoration for 1 week | Lung CT showed patchy high-density shadows with cavity formation in both lungs | One sputum smears were positive. | Positive | Positive | NA | NA | Non drug resistance | Primary treatment | Confirmed active case |
| 903 | Cough, expectoration and hemoptysis for 2 years | Lung CT showed infection in both lungs and consolidation in the left lung with multiple cavities | One sputum smears were positive. | Positive | Positive | NA | Positive | Non drug resistance | Primary treatment | Confirmed active case |
| 904 | Cough and expectoration for 2 years | Lung CT showed scattered patchy increased density shadows in both lungs | One sputum smears were positive. | Positive | Positive | NA | NA | Non drug resistance | Primary treatment | Confirmed active case |
| 905 | Cough and expectoration for 5 years | Lung CT showed tuberculosis in both lungs | Negative | Positive | NA | NA | Positive | Isoniazid | Primary treatment | Confirmed active case |
| 906 | Cough, expectoration and fever for half a year | Lung CT showed tuberculosis in both lungs with cavity formation in both upper lungs | One sputum smears were positive. | Positive | Positive | NA | NA | Non drug resistance | Primary treatment | Confirmed active case |
| 907 | Cough and hemoptysis for 2 days | Lung CT showed scattered patches and speckled increased density shadows in the upper, middle and lower parts of both lungs | Negative | Positive | Positive | NA | NA | Isoniazid, rifampicin, streptomycin, fuquinolone | Primary treatment | Confirmed active case |
| 908 | Lung shadow for 11 months | Lung CT showed tuberculosis and local cavity formation in the left lower lung | Negative | Negative | Positive | NA | NA | Non drug resistance | Primary treatment | Confirmed active case |
| 909 | Cough and expectoration for 1 month | Lung CT showed tuberculosis in both lungs and the formation of cavity in the middle lobe of the right lung | Two sputum smears were positive. | Positive | NA | NA | NA | Streptomycin, rifampicin, isoniazid, ethambutol | Primary treatment | Confirmed active case |
| 910 | Cough and expectoration for 10 years | Lung CT showed tuberculosis in both lungs with multiple cavities in the left upper lung | One sputum smears were positive. | Positive | Positive | NA | NA | Non drug resistance | Primary treatment | Confirmed active case |
| 911 | Cough and expectoration for half a year | Lung CT showed patchy, nodular and cavitary shadows in both lungs | One sputum smears were positive. | Positive | Positive | NA | Positive | Non drug resistance | Primary treatment | Confirmed active case |
| 912 | Hemoptysis for 4 days | Lung CT showed tuberculosis in the right lung | One sputum smears were positive. | Positive | Positive | NA | Positive | Non drug resistance | Primary treatment | Confirmed active case |
| 913 | Cough and expectoration for 1 month | Lung CT showed diffuse nodular shadow and patchy shadow in both lungs | One sputum smears were positive. | Positive | Positive | NA | Positive | Non drug resistance | Primary treatment | Confirmed active case |
| 914 | Cough for three and a half years | Lung CT showed tuberculosis with cavity in both lungs | Negative | NA | Positive | NA | NA | Rifampicin | Retreatment | Confirmed active case |
| 915 | Cough and expectoration for 2 months | Lung CT showed tuberculosis in the upper lobe of the right lung | One sputum smears were positive. | Negative | Positive | NA | NA | Rifampicin | Primary treatment | Confirmed active case |
| 916 | Cough and expectoration for half a year | Lung CT showed tuberculosis in both lungs | Negative | Positive | Positive | NA | Positive | Non drug resistance | Primary treatment | Confirmed active case |
| 917 | Cough, expectoration and fever for 1 week | Lung CT showed tuberculosis in both lungs | Negative | Positive | Positive | NA | Positive | Non drug resistance | Primary treatment | Confirmed active case |
| 918 | Lung shadow for 5 days | Lung CT showed that there were chronic infectious lesions in the upper lobes of both lungs, and tuberculosis could not be excluded | Negative | Negative | Positive | NA | Negative | Non drug resistance | Primary treatment | Confirmed active case |
| 919 | Fever for 20 days | Lung CT showed blood group disseminated tuberculosis in both lungs | Negative | Negative | Positive | NA | Positive | Non drug resistance | Primary treatment | Confirmed active case |
| 920 | Lung shadow for half a year | Lung CT showed multiple nodules of different sizes in both lungs | Negative | Positive | Positive | NA | NA | Non drug resistance | Primary treatment | Confirmed active case |
| 921 | Cough and expectoration for 3 months and fever for 1 month | Lung CT showed tuberculosis in the upper lobe of the right lung | Negative | Positive | Positive | NA | NA | Non drug resistance | Primary treatment | Confirmed active case |
| 922 | Cough and expectoration for 1 week | Lung CT showed tuberculosis in both lungs | One sputum smears were positive. | Positive | Positive | NA | NA | Non drug resistance | Primary treatment | Confirmed active case |
| 923 | Cough and expectoration for 7 months | Lung CT showed tuberculosis with cavity in both lungs | Negative | NA | Positive | NA | NA | NA | Primary treatment | Confirmed active case |
| 924 | Cough and expectoration for 2 years | Lung CT showed tuberculosis in both lungs | Negative | Positive | Negative | NA | NA | Rifampicin, isoniazid | Retreatment | Confirmed active case |
| 925 | Lung shadow for 6 days | Lung CT showed multiple lesions in the upper lobes of both lungs and cavity formation in the left upper lung. Tuberculosis should be considered first | Negative | Positive | Positive | NA | NA | Non drug resistance | Primary treatment | Confirmed active case |
| 926 | Cough and expectoration for 1 month | Lung CT showed spots and striped high-density shadows in both lungs | One sputum smears were positive. | Positive | Positive | NA | NA | Non drug resistance | Primary treatment | Confirmed active case |
| 927 | Lung shadow for 2 weeks | Lung CT showed cavity shadow in the posterior segment of the upper lobe of the left lung | Negative | Positive | Positive | NA | Positive | Non drug resistance | Primary treatment | Confirmed active case |
| 928 | Cough and expectoration for 1 year | Lung CT showed scattered patches and nodules in the right lung | Negative | Positive | Negative | NA | NA | NA | Primary treatment | Confirmed active case |
| 929 | Cough and expectoration for more than 4 years | Lung CT showed scattered patches and nodules in the right upper lung | Negative | Positive | Positive | NA | Positive | Non drug resistance | Primary treatment | Confirmed active case |
| 930 | Cough and expectoration for 5 months | Lung CT showed scattered punctate high-density shadows in the upper lobe of the right lung and the lower lobe of the left lung,flake high-density shadows in the upper lobe of the left lung | One sputum smears were positive. | Positive | Positive | NA | NA | Non drug resistance | Primary treatment | Confirmed active case |
| 931 | Cough and expectoration for 1 year | Lung CT showed tuberculosis with cavity in both lungs | Two sputum smears were positive. | Positive | Positive | NA | NA | Non drug resistance | Retreatment | Confirmed active case |
| 932 | Cough for 3 months | Lung CT showed infectious lesions in both lungs with cavity formation in the right upper lung | One sputum smears were positive. | Positive | Positive | NA | NA | Streptomycin, rifampicin, isoniazid | Primary treatment | Confirmed active case |
| 933 | Lose weight for 1 year | Lung CT showed that there were patches and cavities in the lung | One sputum smears were positive. | Positive | Positive | NA | NA | Streptomycin, rifampicin, isoniazid | Primary treatment | Confirmed active case |
| 934 | Cough for 2 months | Lung CT showed infection in both lungs. It is considered to be tuberculosis | Negative | Positive | Positive | NA | NA | Streptomycin, rifampicin | Primary treatment | Confirmed active case |
| 935 | Lung shadow for 1 month | Lung CT showed scattered patches and cord shadows in the right lung | Negative | Negative | Positive | NA | Positive | Non drug resistance | Primary treatment | Confirmed active case |
| 936 | Cough for 2 weeks | Lung CT showed scattered patches and cord shadows in the right lung | One sputum smears were positive. | Positive | Positive | NA | Positive | Non drug resistance | Primary treatment | Confirmed active case |
| 937 | Cough and expectoration for 1 month | Lung CT showed patchy shadows in the upper lobe of the right lung | One sputum smears were positive. | Positive | Positive | NA | Positive | Non drug resistance | Primary treatment | Confirmed active case |
| 938 | Hemoptysis for 1 day | Lung CT showed multiple lesions in the left upper lung with cavity formation and tuberculosis to be discharged | Negative | Positive | Positive | NA | Positive | Isoniazid | Primary treatment | Confirmed active case |
| 939 | Cough and expectoration for 1 month | Lung CT showed patchy cavity shadow in the upper lobe of the right lung, and scattered patchy shadow in the lower lobe of the right lung and left lung. It is considered to be tuberculosis | One sputum smears were positive. | Positive | Positive | NA | NA | Non drug resistance | Primary treatment | Confirmed active case |
| 940 | Cough and expectoration for 2 months | Lung CT showed infectious lesions in both lungs, which may be tuberculosis | Negative | Positive | Positive | NA | Positive | Streptomycin, rifampicin, isoniazid | Primary treatment | Confirmed active case |
| 941 | Cough and expectoration for 2 months | Lung CT showed diffuse lesions in both lungs | One sputum smears were positive. | Positive | Positive | NA | NA | Non drug resistance | Primary treatment | Confirmed active case |
| 942 | Cough and expectoration for 1 month | Lung CT showed patches and speckles in the right lower lung and left upper lung | One sputum smears were positive. | Negative | Positive | NA | NA | Non drug resistance | Primary treatment | Confirmed active case |
| 943 | Cough and fever for 1 week | Lung CT showed diffuse lesions in both lungs. The first consideration was infectious lesions | One sputum smears were positive. | Positive | Positive | NA | NA | Non drug resistance | Primary treatment | Confirmed active case |
| 944 | Lung shadow for 1 month | Lung CT showed patches and nodules in the posterior segment of the upper lobe tip of the left lung | Negative | Negative | Positive | NA | Positive | Non drug resistance | Primary treatment | Confirmed active case |
| 945 | Hemoptysis for 10 days | Lung CT showed infection in both lungs. It is considered to be tuberculosis | One sputum smears were positive. | Positive | NA | NA | Positive | NA | Primary treatment | Confirmed active case |
| 946 | Right hip pain for 5 years | Lung CT showed tuberculosis in both lungs | Negative | Positive | Positive | NA | NA | Non drug resistance | Primary treatment | Confirmed active case |
| 947 | Cough and expectoration for half a year | Lung CT showed tuberculosis in both lungs | Negative | Negative | Positive | NA | Positive | Non drug resistance | Primary treatment | Confirmed active case |
| 948 | Cough and expectoration for 2 months | Lung CT showed atelectasis in the anterior segment of the upper lobe of the right lung | Three sputum smears were positive. | Positive | Positive | NA | Positive | Rifampicin, isoniazid | Primary treatment | Confirmed active case |
| 949 | Hemoptysis for 6 days | Lung CT showed tuberculosis in both lungs with cavity formation in the lower right lung | Negative | Negative | Positive | NA | NA | Non drug resistance | Primary treatment | Confirmed active case |
| 950 | Fatigue and anorexia for 1 month | Lung CT showed chestnut shadow in both lungs | Negative | Positive | Positive | NA | NA | Non drug resistance | Primary treatment | Confirmed active case |
| 951 | Right neck mass for 4 days | Lung CT showed patchy shadows in the left upper lobe | Negative | Positive | Positive | NA | Positive | Non drug resistance | Primary treatment | Confirmed active case |
| 952 | Cough and expectoration for 2 months | Lung CT showed tuberculosis in both lungs | Negative | Positive | Positive | NA | NA | Non drug resistance | Primary treatment | Confirmed active case |
| 953 | Cough and expectoration for 1 year | Lung CT showed tuberculosis in both lungs with cavity in the right upper lung | One sputum smears were positive. | Positive | Positive | NA | Positive | Streptomycin, rifampicin, isoniazid | Retreatment | Confirmed active case |
| 954 | Cough and expectoration for 3 weeks | Lung CT showed large uneven density increase shadow and cavity shadow in the right lung | One sputum smears were positive. | Positive | Positive | NA | NA | Non drug resistance | Primary treatment | Confirmed active case |
| 955 | Lung shadow for 5 days | Lung CT showed scattered nodular and nodular hyperdense shadows in the right lung, and some lesions had cavity like changes | One sputum smears were positive. | Positive | Positive | NA | NA | Non drug resistance | Primary treatment | Confirmed active case |
| 956 | Cough for 1 year | Lung CT showed tuberculosis with multiple cavities in the upper left of both lungs | Negative | Positive | Positive | NA | NA | Non drug resistance | Primary treatment | Confirmed active case |
| 957 | Lung shadow for 1 week | Lung CT showed tuberculosis in both lungs with multiple cavities in the left upper lung | Negative | Negative | Positive | NA | Positive | Non drug resistance | Primary treatment | Confirmed active case |
| 958 | Lung shadow for 1 week | Pulmonary CT showed inflammation in the apical segment of the upper lobe of the left lung and the dorsal segment of the lower lobe of the left lung. Pulmonary tuberculosis was considered | Negative | Positive | Positive | NA | Negative | Isoniazid, rifampicin, streptomycin, fuquinolone | Primary treatment | Confirmed active case |
| 959 | Cough and expectoration for 1 month | Lung CT showed tuberculosis in both lungs | Negative | Positive | NA | NA | Positive | Streptomycin, rifampicin, isoniazid, ethambutol | Primary treatment | Confirmed active case |
| 960 | Cough and expectoration for half a year | Lung CT showed multiple patchy shadows and cavitary shadows in both lungs | Negative | Positive | Positive | NA | Positive | Non drug resistance | Primary treatment | Confirmed active case |
| 961 | Repeated fever for 1 year | Lung CT showed tuberculosis in both lungs | Negative | Positive | Positive | NA | NA | Rifampicin | Primary treatment | Confirmed active case |
| 962 | Cough and expectoration for 2 months | Lung CT showed patchy high-density shadow in both lungs | Negative | Positive | Positive | NA | Positive | Non drug resistance | Primary treatment | Confirmed active case |
| 963 | Cough and expectoration for 1 year | Lung CT showed tuberculosis in both lungs with cavities in both upper lobes | Negative | Negative | Positive | NA | NA | Non drug resistance | Primary treatment | Confirmed active case |
| 964 | Cough and expectoration for half a month | Lung CT showed multiple patchy high-density shadows in both lungs, consolidation and cavity shadows in the right upper lung | One sputum smears were positive. | Positive | Positive | NA | NA | Non drug resistance | Primary treatment | Confirmed active case |
| 965 | Cough and expectoration for 3 months | NA | Two sputum smears were positive. | Positive | Positive | NA | Positive | Non drug resistance | Primary treatment | Confirmed active case |
| 966 | Anti tuberculosis treatment for 4 months | Lung CT showed tuberculosis with cavity formation in both lungs | Negative | Negative | Positive | NA | NA | Non drug resistance | Primary treatment | Confirmed active case |
| 967 | Cough and expectoration for 10 days | Lung CT showed spots and striped high-density shadows in both lungs | Negative | Negative | Positive | NA | Positive | Non drug resistance | Primary treatment | Confirmed active case |
| 968 | Lung shadow for 16 months | Lung CT showed tuberculosis in the right lung | Negative | Negative | Positive | NA | NA | Non drug resistance | Primary treatment | Confirmed active case |
| 969 | Anti tuberculosis treatment for half a month | Lung CT showed multiple bronchiectasis with infection in both lungs | Negative | Positive | Positive | NA | NA | Isoniazid, rifampicin, streptomycin, fuquinolone | Primary treatment | Confirmed active case |
| 970 | Fever and chest pain for 1 month | Lung CT showed tuberculosis in both lungs with the formation of cavity in the upper lobe of the right lung | Two sputum smears were positive. | Positive | Positive | NA | NA | Streptomycin, rifampicin, isoniazid, ethambutol | Retreatment | Confirmed active case |
| 971 | Cough and expectoration for 3 months | Lung CT showed infection in the left lung and nodules with cavities in the upper lobe of the right lung | Negative | Positive | Positive | NA | NA | Non drug resistance | Primary treatment | Confirmed active case |
| 972 | Cough and expectoration for 1 month | Lung CT showed obstructive pneumonia in the middle and lower lobes of the right lung and inflammatory fibrous foci in the lingual segment of the lower lobe of the left lung | Negative | Positive | Positive | NA | NA | Non drug resistance | Primary treatment | Confirmed active case |
| 973 | Cough and expectoration for half a year | Lung CT showed multiple patchy shadows in both lungs, and pulmonary tuberculosis could not be excluded | One sputum smears were positive. | Positive | Positive | NA | Positive | Non drug resistance | Primary treatment | Confirmed active case |
| 974 | Chest tightness and shortness of breath for 1 week | Lung CT showed tuberculosis in both lungs | Negative | Positive | Positive | NA | Positive | Non drug resistance | Primary treatment | Confirmed active case |
| 975 | Cough and expectoration for 2 months | Lung CT showed damage in the apical segment and cavity formation in the posterior segment of the upper lobe of the left lung | One sputum smears were positive. | Positive | Positive | NA | Positive | Non drug resistance | Primary treatment | Confirmed active case |
| 976 | Cough, expectoration and fever for 20 days | Lung CT showed patchy nodular calcification in the right lung | Negative | Negative | Positive | NA | NA | Non drug resistance | Primary treatment | Confirmed active case |
| 977 | Cough and expectoration for 1 week | Lung CT showed tuberculosis in the left lung with cavity formation in the left lower lung | Negative | Positive | Positive | NA | Positive | Non drug resistance | Primary treatment | Confirmed active case |
| 978 | Cough, expectoration and hemoptysis for 3 days | Lung CT showed cavities and patchy shadows in the posterior segment of the upper lobe tip of the right lung | One sputum smears were positive. | Positive | Positive | NA | NA | Non drug resistance | Primary treatment | Confirmed active case |
| 979 | Anti tuberculosis treatment for 8 months | Lung CT showed multiple patchy shadows in the upper lobes of both lungs and new cavities in the dorsal segment of the lower lobe of the right lung | Negative | Negative | Positive | NA | NA | Rifampicin | Retreatment | Confirmed active case |
| 980 | Cough for 11 months | Lung CT showed that there were scattered patches, masses and strips of increased density in both lungs, and there was cavity formation in the left upper lung | One sputum smears were positive. | Positive | Positive | NA | NA | Non drug resistance | Retreatment | Confirmed active case |
| 981 | Cough and expectoration for 5 years | Lung CT showed multiple nodule shadows in both lungs and cavity shadows in the left upper lung | Three sputum smears were positive. | Positive | Positive | NA | NA | Rifampicin, isoniazid, fluoroquinolone | Retreatment | Confirmed active case |
| 982 | Cough and expectoration for 2 months | Lung CT showed mild bronchiectasis with inflammation in the middle lobe of the right lung and the upper lobe of the left lung | One sputum smears were positive. | Positive | Positive | NA | Positive | Rifampicin | Primary treatment | Confirmed active case |
| 983 | Cough and expectoration for 4 months | Lung CT showed patchy increased density shadow and cavity in the upper lobe of the right lung | One sputum smears were positive. | Positive | Positive | NA | Positive | Non drug resistance | Primary treatment | Confirmed active case |
| 984 | Lung shadow for 11 months | Lung CT showed tuberculosis with cavity formation in the right upper lung | Negative | Positive | Positive | NA | NA | Isoniazid, rifampicin, streptomycin, fuquinolone | Primary treatment | Confirmed active case |
| 985 | Cough, expectoration and hemoptysis for half a year | Lung CT showed tuberculosis in both lungs with cavity in the right upper lung | Negative | Negative | Positive | NA | NA | Non drug resistance | Primary treatment | Confirmed active case |
| 986 | Cervical lymph node enlargement for nearly 2 weeks | Lung CT showed infectious lesions in the right upper lung | One sputum smears were positive. | Positive | Positive | NA | NA | Non drug resistance | Primary treatment | Confirmed active case |
| 987 | Cough and expectoration for 3 months | Lung CT showed patches, nodules and small cavities in both lungs | One sputum smears were positive. | Positive | Positive | NA | NA | Non drug resistance | Primary treatment | Confirmed active case |
| 988 | Cough and expectoration for 6 days | Lung CT showed patchy increased density in the upper lobe of the left lung | Negative | Positive | Positive | NA | Positive | Rifampicin, isoniazid | Primary treatment | Confirmed active case |
| 989 | Lung shadow for 1 week | Lung CT shows that it may be pulmonary tuberculosis | One sputum smears were positive. | Positive | Positive | NA | Positive | Non drug resistance | Primary treatment | Confirmed active case |
| 990 | Cough and expectoration for 3 months | Lung CT showed tuberculosis in both lungs | Negative | Positive | Positive | NA | NA | Non drug resistance | Primary treatment | Confirmed active case |
| 991 | Cough and expectoration for 1 month | Lung CT showed tuberculosis with cavity in both lungs | One sputum smears were positive. | Positive | Positive | NA | Negative | Non drug resistance | Primary treatment | Confirmed active case |
| 992 | Cough and expectoration for half a year | Lung CT showed tuberculosis with cavity in both lungs | Three sputum smears were positive. | Positive | Positive | NA | Positive | Non drug resistance | Primary treatment | Confirmed active case |
| 993 | Cough and expectoration for 1 year | Lung CT showed multiple patches, nodules and cavities in both lungs | One sputum smears were positive. | Positive | Positive | NA | Positive | Non drug resistance | Primary treatment | Confirmed active case |
| 994 | Cough and expectoration for half a year | Lung CT showed infectious lesions in both lungs | Three sputum smears were positive. | Positive | Positive | NA | NA | Rifampicin | Primary treatment | Confirmed active case |
| 995 | Cough, expectoration for 15 months, hemoptysis for 8 months | Lung CT showed tuberculosis in the right lung | One sputum smears were positive. | Negative | Positive | NA | Positive | Non drug resistance | Retreatment | Confirmed active case |
| 996 | Lung shadow for 10 days | Lung CT showed tuberculosis in both lungs | Negative | Negative | Positive | NA | NA | Non drug resistance | Primary treatment | Confirmed active case |
| 997 | Cough and expectoration for half a month | Lung CT showed infection in both lungs with cavity formation in both upper lungs | One sputum smears were positive. | Positive | Positive | NA | NA | Non drug resistance | Primary treatment | Confirmed active case |
| 998 | Cough and expectoration for 8 months | Lung CT showed that there were spots, stripes, high-density shadows and cavities in both lungs | Negative | Positive | Positive | NA | NA | Non drug resistance | Retreatment | Confirmed active case |
| 999 | Cough and expectoration for 3 months | Lung CT showed tuberculosis with cavity formation in both lungs | One sputum smears were positive. | Positive | Positive | NA | NA | Non drug resistance | Primary treatment | Confirmed active case |
| 1000 | Lung shadow for 51 days | Lung CT showed tuberculosis with cavity formation in both lungs | Negative | Negative | Positive | NA | NA | Rifampicin, isoniazid | Retreatment | Confirmed active case |
| 1001 | Cough and expectoration for 1 week | Lung CT showed that there were patches and fibrous strips in the upper, middle and lower part of the right lung and cavities in the right upper lung | Three sputum smears were positive. | Positive | Positive | NA | NA | Streptomycin, rifampicin, isoniazid | Retreatment | Confirmed active case |
| 1002 | Anti tuberculosis treatment for 9 months | Lung CT showed scattered nodules and patchy increased density shadows in the upper lobe of the right lung | Negative | Negative | Positive | NA | Positive | Non drug resistance | Primary treatment | Confirmed active case |
| 1003 | Cough and expectoration for half a year | Lung CT showed tuberculosis in both lungs | Negative | Positive | Positive | NA | NA | Non drug resistance | Primary treatment | Confirmed active case |
| 1004 | Cough and expectoration for 1 month | Lung CT showed patchy increased density shadow in the right upper lung | One sputum smears were positive. | Positive | Positive | NA | Positive | Non drug resistance | Primary treatment | Confirmed active case |
| 1005 | Fever for 2 weeks | Lung CT showed patchy shadows in the right upper lung | Negative | Positive | Positive | NA | Positive | Non drug resistance | Primary treatment | Confirmed active case |
| 1006 | Cough and expectoration for 2 months | Lung CT showed tuberculosis in both lungs | Negative | Negative | Positive | NA | NA | Non drug resistance | Primary treatment | Confirmed active case |
| 1007 | Anti tuberculosis treatment for 3 years | Lung CT showed tuberculosis in both lungs | Negative | Positive | Positive | NA | NA | Streptomycin, rifampicin, isoniazid | Retreatment | Confirmed active case |
| 1008 | Cough and expectoration for 1 month | Lung CT showed multiple infectious lesions in both lungs with cavity formation in the upper lobe of the left lung, so tuberculosis should be excluded | Negative | Positive | Positive | NA | Positive | Streptomycin, rifampicin, isoniazid | Primary treatment | Confirmed active case |
| 1009 | Pulmonary lesions increased for 10 days | Lung CT showed tuberculosis in both lungs | One sputum smears were positive. | Positive | Positive | NA | Positive | Non drug resistance | Primary treatment | Confirmed active case |
| 1010 | Antituberculosis treatment for 2 months | Lung CT showed scattered spots and patches in the lower lobe of the left lung | Negative | Negative | Positive | NA | NA | Rifampicin | Retreatment | Confirmed active case |
| 1011 | Lung shadow for 2 years | Lung CT showed small patches and chestnut shadows in the posterior segment of the upper lobe and the middle lobe of the right lung | Negative | Positive | Positive | NA | NA | Non drug resistance | Primary treatment | Confirmed active case |
| 1012 | Cough and expectoration for 20 years | Lung CT showed tuberculosis in both lungs | One sputum smears were positive. | Positive | Positive | NA | NA | Non drug resistance | Primary treatment | Confirmed active case |
| 1013 | Cough and expectoration for 3 years | Lung CT showed tuberculosis with multiple cavities in both lungs | Negative | Positive | Positive | NA | NA | Streptomycin, rifampicin, isoniazid, ethambutol | Retreatment | Confirmed active case |
| 1014 | Lung shadow for 3 days | Lung CT showed patchy hyperdense shadows and cavities in the lower lobe of the left lung | Negative | Positive | Positive | NA | Positive | Non drug resistance | Primary treatment | Confirmed active case |
| 1015 | Chills and fever for 3 weeks | Lung CT showed that there were diffuse nodules in both lungs, and the possibility of blood seeding pulmonary tuberculosis was high | Negative | Positive | Positive | NA | NA | Non drug resistance | Primary treatment | Confirmed active case |
| 1016 | Cough and expectoration for 1 month | Lung CT showed tuberculosis in the right lung | Negative | Positive | Positive | NA | NA | Rifampicin, isoniazid | Primary treatment | Confirmed active case |
| 1017 | Fever for 12 days | Lung CT showed multiple infections in both lungs | One sputum smears were positive. | Positive | Positive | NA | Positive | Non drug resistance | Primary treatment | Confirmed active case |
| 1018 | Cough and expectoration for 3 weeks | Lung CT showed a patchy shadow in the right lung | Negative | Negative | Positive | NA | Positive | Non drug resistance | Retreatment | Confirmed active case |
| 1019 | Cough and expectoration for 1 month | Lung CT showed that there were diffuse spots and stripes of increased density in both lungs, and the formation of cavities on both lungs | One sputum smears were positive. | Positive | Positive | NA | Positive | Non drug resistance | Primary treatment | Confirmed active case |
| 1020 | Hemoptysis for 3 days | Lung CT showed patches and nodules in the dorsal segment of the lower lobe of the left lung | Negative | Negative | Positive | NA | NA | Non drug resistance | Primary treatment | Confirmed active case |
| 1021 | Anti tuberculosis treatment for 3 years | Lung CT showed tuberculosis in both lungs | One sputum smears were positive. | Positive | Positive | NA | NA | Streptomycin, rifampicin, isoniazid, ethambutol | Retreatment | Confirmed active case |
| 1022 | Cough and expectoration for 1 month | Lung CT showed scattered patches and strip shadows in the middle and lower lobe of the right lung, and multiple small nodules in both lungs | One sputum smears were positive. | Positive | Positive | NA | NA | Non drug resistance | Primary treatment | Confirmed active case |
| 1023 | Cough and expectoration for 2 days | Lung CT showed that there were small chestnut nodules in both lungs and nodular shadows in the lower lobes of both lungs | Negative | Negative | Positive | NA | NA | Non drug resistance | Retreatment | Confirmed active case |
| 1024 | Cough for 1 month with blood in sputum for 3 days | Lung CT showed infectious lesions in the right lung and cavity formation in the right lung tip | Negative | Negative | Positive | NA | Positive | Non drug resistance | Primary treatment | Confirmed active case |
| 1025 | Cough and expectoration for 1 month | Lung CT showed tuberculosis in the upper lobe of the right lung and left lung | One sputum smears were positive. | Positive | Positive | NA | Positive | Non drug resistance | Primary treatment | Confirmed active case |
| 1026 | Cough and expectoration for 1 month | Lung CT showed scattered irregular patchy high-density shadows in both lungs | Negative | Negative | Positive | NA | NA | Non drug resistance | Primary treatment | Confirmed active case |
| 1027 | Lung shadow for 2 years | Lung CT showed tuberculosis in both lungs with cavity formation in the right upper lung | Negative | Positive | Positive | NA | NA | Non drug resistance | Primary treatment | Confirmed active case |
| 1028 | Cough and expectoration for 1 month | Lung CT showed tuberculosis in both lungs | Negative | Positive | Positive | NA | Positive | Non drug resistance | Primary treatment | Confirmed active case |
| 1029 | Cough and expectoration for 3 months | Lung CT showed tuberculosis in the right lung | Negative | Positive | Positive | NA | Positive | Non drug resistance | Retreatment | Confirmed active case |
| 1030 | Lung shadow for 10 years | Lung CT showed massive and nodular shadows in both lungs, and there was cavity formation in the upper lobe of the right lung | Negative | Positive | Positive | NA | Positive | Streptomycin | Primary treatment | Confirmed active case |
| 1031 | Cough and expectoration for 1 month | Lung CT showed scattered spots and patchy shadows with multiple cavities in both lungs | Two sputum smears were positive. | Positive | Positive | NA | NA | Rifampicin, isoniazid | Retreatment | Confirmed active case |
| 1032 | Cough and expectoration for 1 month | Lung CT showed scattered spots and patches in both lungs | Negative | Positive | Negative | NA | NA | Non drug resistance | Primary treatment | Confirmed active case |
| 1033 | Cough and expectoration for 11 days | Lung CT showed multiple patchy and nodular lesions in both lungs and cavities in the upper lobe of the left lung | NA | NA | Positive | NA | NA | Rifampicin | Primary treatment | Confirmed active case |
| 1034 | Cough and expectoration for 2 months | Lung CT shows that there may be tuberculosis in both lungs | Negative | Positive | Positive | NA | Positive | Non drug resistance | Primary treatment | Confirmed active case |
| 1035 | Cough and expectoration for 20 years | Lung CT showed that pulmonary tuberculosis could not be excluded | Negative | Positive | Positive | NA | NA | Non drug resistance | Primary treatment | Confirmed active case |
| 1036 | Lung shadow | Lung CT showed that there may be tuberculosis in both lungs | Negative | Positive | Positive | NA | Positive | Non drug resistance | Primary treatment | Confirmed active case |
| 1037 | Cough and expectoration for half a year | Lung CT showed multiple patches and consolidation in both lungs and cavity formation in the right upper lung | Two sputum smears were positive. | Positive | NA | NA | Positive | Non drug resistance | Primary treatment | Confirmed active case |
| 1038 | Lung shadow for 3 months | Lung CT showed infectious lesions in both lungs. Tuberculosis should be considered first | Negative | Positive | Positive | NA | NA | Non drug resistance | Primary treatment | Confirmed active case |
| 1039 | Cough and expectoration for 1 month | Lung CT showed patchy increased density shadow and nodular shadow in the posterior segment of the upper lobe of the left lung | Negative | Positive | Positive | NA | NA | Non drug resistance | Primary treatment | Confirmed active case |
| 1040 | Lung shadow for 1 month | Lung CT showed patchy increased density shadow and nodular shadow in the posterior segment of the upper lobe of the left lung | Negative | Positive | Positive | NA | NA | Non drug resistance | Primary treatment | Confirmed active case |
| 1041 | Fever for 1 year | Lung CT showed extensive tuberculosis with extensive cavity formation in both lungs | One sputum smears were positive. | NA | NA | NA | NA | Non drug resistance | Primary treatment | Confirmed active case |
| 1042 | Lung shadow for 10 days | Lung CT showed that there were multiple spots, patches and nodular shadows in the apical segment of the upper lobe of the left lung, and large intranodular cavities were formed | One sputum smears were positive. | Positive | Positive | NA | NA | Streptomycin, fluoroquinolone | Primary treatment | Confirmed active case |
| 1043 | Cough and expectoration for half a year | Lung CT showed damage at the right lung tip, which may be tuberculosis | One sputum smears were positive. | Positive | Positive | NA | Positive | Non drug resistance | Primary treatment | Confirmed active case |
| 1044 | Hemoptysis for 1 month | Lung CT showed that tuberculosis could not be excluded | Two sputum smears were positive. | Positive | Positive | NA | Positive | Streptomycin | Primary treatment | Confirmed active case |
| 1045 | Cough for 2 weeks and hemoptysis for 5 days | Lung CT showed multiple patches and nodules in both lungs | One sputum smears were positive. | Positive | Positive | NA | Positive | Rifampicin, isoniazid | Retreatment | Confirmed active case |
| 1046 | Cough and expectoration for 1 month | Lung CT showed multiple nodules in both lungs | One sputum smears were positive. | Positive | Positive | NA | Positive | Non drug resistance | Primary treatment | Confirmed active case |
| 1047 | Hemoptysis for 3 days | Lung CT showed that there were spots, nodules and patchy high-density shadows in both lungs with cavity formation in the posterior wall | One sputum smears were positive. | Positive | Positive | NA | NA | Non drug resistance | Retreatment | Confirmed active case |
| 1048 | Cough and expectoration for 1 month | Lung CT showed multiple patches and nodules in both lungs and the formation of cavity in the lower lobe of the left lung | Three sputum smears were positive. | Positive | Positive | NA | Positive | Streptomycin | Primary treatment | Confirmed active case |
| 1049 | Hemoptysis for 3 days | Lung CT showed tuberculosis in both lungs with cavity formation in the left upper lung | Two sputum smears were positive. | Positive | Positive | NA | Positive | Streptomycin, isoniazid | Primary treatment | Confirmed active case |
| 1050 | Cough and expectoration for 1 month | Lung CT showed tuberculosis in both lungs | Negative | Negative | Positive | NA | Positive | Non drug resistance | Primary treatment | Confirmed active case |
| 1051 | Cough and expectoration for 2 months | Lung CT showed active tuberculosis in the upper lobe of the right lung and the formation of cavity in the upper lobe of the right lung | One sputum smears were positive. | Positive | Positive | NA | NA | Non drug resistance | Primary treatment | Confirmed active case |
| 1052 | Lung shadow for 9 days | Lung CT showed multiple nodules in both lungs | One sputum smears were positive. | Positive | Positive | NA | NA | Non drug resistance | Primary treatment | Confirmed active case |
| 1053 | Cough and expectoration for 1 month | Lung CT showed consolidation in the middle lobe of the right lung | One sputum smears were positive. | Positive | Positive | NA | NA | Non drug resistance | Primary treatment | Confirmed active case |
| 1054 | Cough and expectoration for 2 years | NA | One sputum smears were positive. | Positive | Positive | NA | Positive | Rifampicin | Retreatment | Confirmed active case |
| 1055 | Lung shadow | Lung CT showed multiple patchy shadows in both lungs and cavity formation in the left upper lung | Negative | Positive | Positive | NA | NA | Fluoroquinolone, rifampicin | Retreatment | Confirmed active case |
| 1056 | Cough and expectoration for 3 months | Lung CT showed infection in both lungs | One sputum smears were positive. | Positive | Positive | NA | Positive | Non drug resistance | Primary treatment | Confirmed active case |
| 1057 | Cough and expectoration for 6 months | Lung CT showed tuberculosis in the middle and upper lobe of the right lung | Negative | Negative | Positive | NA | Negative | Non drug resistance | Primary treatment | Confirmed active case |
| 1058 | Chest tightness and fever for 10 days | Lung CT showed nodules and masses in both lungs | Negative | Positive | Positive | NA | Positive | Non drug resistance | Primary treatment | Confirmed active case |
| 1059 | Cough and expectoration for 2 months | Lung CT showed tuberculosis in the upper lobe of the left lung. | Negative | Positive | Positive | NA | NA | Non drug resistance | Primary treatment | Confirmed active case |
| 1060 | Cough and expectoration for half a month | Lung CT showed multiple lesions in both lungs | One sputum smears were positive. | Positive | Positive | NA | NA | Non drug resistance | Primary treatment | Confirmed active case |
| 1061 | Cough and expectoration for 1 month | Lung CT showed mass and nodule shadow in the upper middle lobe of the right lung | Negative | Positive | Positive | NA | NA | Non drug resistance | Primary treatment | Confirmed active case |
| 1062 | Cough and expectoration for half a year | Lung CT showed tuberculosis with multiple cavities in both lungs | Three sputum smears were positive. | Positive | Positive | NA | Negative | Non drug resistance | Primary treatment | Confirmed active case |
| 1063 | Cough and expectoration for 1 week | Lung CT showed that it may be tuberculosis in the left upper lobe | Negative | Positive | Positive | NA | Positive | Non drug resistance | Primary treatment | Confirmed active case |
| 1064 | Erythema of both lower limbs for 1 month | Lung CT showed exudative shadow in the basal segment of the lower lobe of the left lung | One sputum smears were positive. | Positive | Positive | NA | NA | Non drug resistance | Primary treatment | Confirmed active case |
| 1065 | Cough and expectoration for 1 month | Lung CT showed that there were infectious foci in the middle and upper lobe of the right lung and the lower lobe of the left lung. It is considered to be tuberculosis | Negative | Positive | Positive | NA | Positive | Streptomycin, rifampicin | Primary treatment | Confirmed active case |
| 1066 | Cough and expectoration for 3 days | Lung CT showed patches, nodules and small cavities in the upper lobe of the right lung | Negative | Positive | Positive | NA | Positive | Non drug resistance | Primary treatment | Confirmed active case |
| 1067 | Cough and expectoration for 1 month | Lung CT showed scattered patchy increased density shadows in both lungs | Negative | Negative | Positive | NA | NA | Rifampicin | Primary treatment | Confirmed active case |
| 1068 | Anti tuberculosis treatment for 5 months | Lung CT showed spots and strips of density shadow in both lungs | Negative | Negative | Positive | NA | NA | Non drug resistance | Primary treatment | Confirmed active case |
| 1069 | Lung shadow for 5 days | Lung CT showed that there was a high possibility of tuberculosis in both lungs, with cavity in the left lung | Negative | Positive | Positive | NA | Negative | Non drug resistance | Primary treatment | Confirmed active case |
| 1070 | Cough and expectoration with blood in sputum for 2 month | Lung CT shows that it may be pulmonary tuberculosis | Negative | Negative | Positive | NA | NA | Streptomycin | Retreatment | Confirmed active case |
| 1071 | Lung shadow for 5 days | Lung CT showed diffuse patchy and nodular increased density shadows in both lungs, and cavitary nodules in the lower right lung | One sputum smears were positive. | Positive | Positive | NA | NA | Non drug resistance | Primary treatment | Confirmed active case |
| 1072 | Cough and expectoration for 5 years | Lung CT showed multiple nodules of different sizes in the right lung and nodules with cavity formation in the upper lobe of the right lung | Negative | Negative | Positive | NA | NA | Non drug resistance | Primary treatment | Confirmed active case |
| 1073 | Cough and expectoration for 2 years | Lung CT showed tuberculosis in both lungs | Negative | Positive | Positive | NA | Positive | Non drug resistance | Primary treatment | Confirmed active case |
| 1074 | Cough and expectoration for 2 months | Lung CT showed infectious lesions with cavity formation in the right upper lung and the dorsal segments of both lower lungs | One sputum smears were positive. | Positive | Positive | NA | Positive | Non drug resistance | Primary treatment | Confirmed active case |
| 1075 | Cough, expectoration and fever for 1 month | Lung CT showed scattered patches and nodular masses with cavity formation in both lungs | One sputum smears were positive. | Positive | Positive | NA | Positive | Non drug resistance | Primary treatment | Confirmed active case |
| 1076 | Cough and expectoration for 2 months | Lung CT showed tuberculosis in the left lung | Negative | Positive | Positive | NA | Positive | Non drug resistance | Primary treatment | Confirmed active case |
| 1077 | Hemoptysis for 1 month | Lung CT showed nodules and streaks in the lower lobe of the left lung | Three sputum smears were positive. | NA | NA | NA | NA | NA | Primary treatment | Confirmed active case |
| 1078 | Cough and expectoration for 10 years | Lung CT showed tuberculosis with cavity in both lungs | One sputum smears were positive. | Positive | Negative | NA | NA | Streptomycin, isoniazid, ethambutol | Primary treatment | Confirmed active case |
| 1079 | Cough for 1 year | Lung CT showed scattered nodules in the left upper lung | Negative | Positive | Positive | NA | Negative | Non drug resistance | Primary treatment | Confirmed active case |
| 1080 | Cough and expectoration for 8 months | Lung CT showed scattered patches and fuzzy high-density shadows in both lungs | Two sputum smears were positive. | Positive | NA | NA | Positive | Non drug resistance | Primary treatment | Confirmed active case |
| 1081 | Lung shadow for 1 week | Lung CT showed tuberculosis in both lungs with multiple cavities in the left lung | One sputum smears were positive. | Positive | Positive | NA | Positive | Non drug resistance | Primary treatment | Confirmed active case |
| 1082 | Cough, expectoration and hemoptysis for 8 days | Lung CT showed consolidation and exudation in the right lung patch | One sputum smears were positive. | Positive | Positive | NA | Positive | Non drug resistance | Primary treatment | Confirmed active case |
| 1083 | Cough and expectoration for 1 month and sputum blood for 1 week | Lung CT showed tuberculosis in both lungs with cavity in the right upper lung | Two sputum smears were positive. | Positive | Positive | NA | NA | Non drug resistance | Primary treatment | Confirmed active case |
| 1084 | Lung shadow for 1 month | Lung CT showed nodular exudation in the upper lobe of the left lung | Negative | Positive | Positive | NA | Positive | Streptomycin, isoniazid | Primary treatment | Confirmed active case |
| 1085 | Cough and expectoration for 5 months | Lung CT showed multiple patchy nodules in both lungs and small cavities in the right lower lung | Negative | Negative | Positive | NA | NA | Rifampicin | Primary treatment | Confirmed active case |
| 1086 | Cough and expectoration for half a year | Lung CT showed that there were scattered patches of increased density shadow in both lungs, and tuberculosis could not be ruled out | Negative | Positive | Positive | NA | NA | Non drug resistance | Primary treatment | Confirmed active case |
| 1087 | Cough and expectoration for 11 months | Lung CT showed infectious lesions in the upper lobe of the left lung, and there was a high possibility of tuberculosis | Negative | Negative | Positive | NA | NA | Non drug resistance | Primary treatment | Confirmed active case |
| 1088 | Cough and expectoration for 20 years | Lung CT showed tuberculosis in both lungs | Negative | Negative | Positive | NA | Negative | Non drug resistance | Primary treatment | Confirmed active case |
| 1089 | Anti tuberculosis treatment for half a month | Lung CT showed tuberculosis in both lungs with cavity formation in the left upper lung | Two sputum smears were positive. | Positive | Positive | NA | NA | Non drug resistance | Primary treatment | Confirmed active case |
| 1090 | Cough for 3 years | Lung CT showed tuberculosis with cavity in both lungs | Two sputum smears were positive. | Positive | Positive | NA | NA | Streptomycin, rifampicin, isoniazid, ethambutol | Retreatment | Confirmed active case |
| 1091 | Lung shadow found for 3 days | Lung CT showed that there were spots and stripes of high-density shadow in both lungs, which may be tuberculosis | One sputum smears were positive. | Positive | Positive | NA | Positive | Non drug resistance | Primary treatment | Confirmed active case |
| 1092 | Cough and expectoration for 2 months | Lung CT showed that there were infectious lesions in both lungs, which was considered to be tuberculosis | One sputum smears were positive. | Positive | Positive | NA | Positive | Streptomycin | Primary treatment | Confirmed active case |
| 1093 | Cough and expectoration for 1 year | Lung CT showed tuberculosis with infection in both lungs | One sputum smears were positive. | Positive | NA | NA | NA | Non drug resistance | Primary treatment | Confirmed active case |
| 1094 | Cough and expectoration for 1 week | Lung CT showed tuberculosis in both upper lobes | One sputum smears were positive. | Positive | Positive | NA | Positive | Rifampicin | Primary treatment | Confirmed active case |
| 1095 | Cough and expectoration for 20 days | Lung CT showed old lesions in the right upper lung and atelectasis in the right middle lobe | One sputum smears were positive. | Positive | Negative | NA | Positive | Non drug resistance | Primary treatment | Confirmed active case |
| 1096 | Fever for half a month | Lung CT showed diffuse chestnut like nodules in both lungs, which may be tuberculosis | Negative | Negative | Positive | NA | NA | Non drug resistance | Primary treatment | Confirmed active case |
| 1097 | Cough and expectoration for 2 months | Lung CT showed multiple patchy exudative shadows in both lungs and cavities in both upper lungs | One sputum smears were positive. | Positive | NA | NA | Positive | Non drug resistance | Primary treatment | Confirmed active case |
| 1098 | Diagnosis of pulmonary tuberculosis for half a year | Lung CT showed extensive spots and striped high-density shadows in both lungs | One sputum smears were positive. | Positive | Positive | NA | NA | Isoniazid | Primary treatment | Confirmed active case |
| 1099 | Cough and expectoration for 5 days | Lung CT showed tuberculosis in both lungs and cavity in the upper right lung | Negative | Positive | Positive | NA | Positive | Non drug resistance | Primary treatment | Confirmed active case |
| 1100 | Lung shadow for 3 days | Lung CT showed tuberculosis in both lungs | One sputum smears were positive. | Positive | Positive | NA | Positive | Isoniazid | Primary treatment | Confirmed active case |
| 1101 | Chest tightness and shortness of breath for half a year | Lung CT showed multiple nodular shadows and patchy increased density shadows in the upper lobe of the left lung | Negative | Positive | Negative | NA | Positive | Non drug resistance | Primary treatment | Confirmed active case |
| 1102 | Chest tightness and shortness of breath for 4 years | Lung CT showed multiple nodules in both lungs and patchy shadows in the lower lobe of the left lung and the middle lobe of the right lung | One sputum smears were positive. | Positive | Positive | NA | Positive | Non drug resistance | Retreatment | Confirmed active case |
| 1103 | Lung shadow for 1 month | Lung CT showed scattered patches and nodular shadows in the left upper lung and the posterior segment of the lower lung | Negative | Positive | Positive | NA | Positive | Streptomycin, rifampicin, isoniazid | Primary treatment | Confirmed active case |
| 1104 | Cough and expectoration for 1 month | Lung CT showed scattered patches and nodules in both lungs | One sputum smears were positive. | Positive | Positive | NA | NA | Rifampicin | Retreatment | Confirmed active case |
| 1105 | Cough and expectoration for 1 year | Lung CT showed diffuse lesions in both lungs | One sputum smears were positive. | Positive | Positive | NA | NA | Non drug resistance | Primary treatment | Confirmed active case |
| 1106 | Repeated hemoptysis for half a month | Lung CT showed tuberculosis in both lungs | Negative | Positive | Positive | NA | Positive | Rifampicin | Primary treatment | Confirmed active case |
| 1107 | Cough and expectoration for 4 months | Lung CT showed tuberculosis in both lungs with cavity in the left upper lung | One sputum smears were positive. | Negative | Positive | NA | NA | Non drug resistance | Primary treatment | Confirmed active case |
| 1108 | Lung shadow for 1 day | Lung CT showed nodules in the apical segment of the upper lobe of the right lung | One sputum smears were positive. | Negative | Positive | NA | Positive | Non drug resistance | Primary treatment | Confirmed active case |
| 1109 | Cough and expectoration for 1 week | Lung CT showed tuberculosis and small cavity formation in both lungs | One sputum smears were positive. | Negative | Positive | NA | NA | Non drug resistance | Retreatment | Confirmed active case |
| 1110 | Cough and expectoration for 1 month | Lung CT showed tuberculosis with cavity in the left lung | Negative | Positive | Positive | NA | NA | Rifampicin | Primary treatment | Confirmed active case |
| 1111 | Cough and expectoration for 5 months | Lung CT showed infectious lesions in both lungs, which may be tuberculosis | Negative | Negative | Positive | NA | NA | Non drug resistance | Primary treatment | Confirmed active case |
| 1112 | Cough and expectoration for 9 months | Lung CT showed patchy shadows in the lower lobe of the right lung | One sputum smears were positive. | Positive | Positive | NA | NA | Isoniazid, streptomycin, fluoroquinolone, ethambutol | Retreatment | Confirmed active case |
| 1113 | Cough and expectoration for 1 week | Lung CT showed multiple lesions and cavity formation in both lungs, which may be tuberculosis | Three sputum smears were positive. | Positive | Positive | NA | NA | Non drug resistance | Retreatment | Confirmed active case |
| 1114 | Cough and expectoration for 1 year | Lung CT showed tuberculosis in both lungs | One sputum smears were positive. | Positive | Positive | NA | Positive | Non drug resistance | Primary treatment | Confirmed active case |
| 1115 | Cough and expectoration for 1 year | Lung CT showed pulmonary tuberculosis in the upper and lower lobes of the left lung | One sputum smears were positive. | Positive | Positive | NA | NA | Non drug resistance | Primary treatment | Confirmed active case |
| 1116 | Cough and expectoration for 3 months | Lung CT showed a space occupying lesion in the middle lobe of the right lung | One sputum smears were positive. | Positive | Positive | NA | Positive | Non drug resistance | Primary treatment | Confirmed active case |
| 1117 | Dry cough for 1 month | NA | One sputum smears were positive. | Positive | Positive | NA | NA | Non drug resistance | Primary treatment | Confirmed active case |
| 1118 | Cough and expectoration for 2 years | Lung CT showed tuberculosis in both lungs | One sputum smears were positive. | Positive | Positive | NA | NA | Streptomycin, rifampicin, isoniazid, ethambutol | Retreatment | Confirmed active case |
| 1119 | Cough and expectoration for half a month | Lung CT showed that there were diffuse grid, strip and patchy density increasing shadows in both lungs, and multiple nodular shadows and cavities were seen in the upper lobe of the left lung | One sputum smears were positive. | NA | Positive | NA | NA | Non drug resistance | Primary treatment | Confirmed active case |
| 1120 | Fever for 5 days | Lung CT showed tuberculosis in both lungs | One sputum smears were positive. | Positive | Negative | NA | Positive | Non drug resistance | Primary treatment | Confirmed active case |
| 1121 | Cough and expectoration for 1 month | Lung CT showed tuberculosis in both lungs | One sputum smears were positive. | Positive | Positive | NA | NA | Non drug resistance | Primary treatment | Confirmed active case |
| 1122 | Lung shadow for 2 months | Lung CT showed patches and consolidation in the upper lobe of the right lung | Negative | Negative | Positive | NA | NA | Non drug resistance | Primary treatment | Confirmed active case |
| 1123 | Cough and expectoration for 1 month | Lung CT showed multiple pleomorphic lesions with multiple cavities in both lungs | One sputum smears were positive. | Positive | Positive | NA | NA | Non drug resistance | Primary treatment | Confirmed active case |
| 1124 | Cough and expectoration for 20 days | Lung CT showed patches, nodules and cavities in the left upper lung | Two sputum smears were positive. | Positive | Positive | NA | Positive | Streptomycin, rifampicin, isoniazid | Primary treatment | Confirmed active case |
| 1125 | Cough and expectoration for 1 month | Lung CT showed tuberculosis with cavity formation in both lungs | Two sputum smears were positive. | Positive | Positive | NA | NA | Streptomycin, rifampicin, isoniazid | Retreatment | Confirmed active case |
| 1126 | Cough, expectoration and shortness of breath for 1 month | Lung CT showed tuberculosis in both upper and middle lungs | One sputum smears were positive. | Negative | Positive | NA | NA | Non drug resistance | Primary treatment | Confirmed active case |
| 1127 | Cough and expectoration for 5 months | Lung CT showed infection in both lungs with consolidation in the left upper lung. It is considered to be tuberculosis | One sputum smears were positive. | Positive | Positive | NA | NA | Non drug resistance | Primary treatment | Confirmed active case |
| 1128 | Cough and expectoration for 3 months | Lung CT showed patchy fuzzy high-density shadows in both lungs | One sputum smears were positive. | Positive | Negative | NA | NA | Non drug resistance | Primary treatment | Confirmed active case |
| 1129 | Anti tuberculosis treatment for half a year | Lung CT showed that there were spots and strips of high-density shadows in both lungs | Negative | Negative | Positive | NA | NA | Rifampicin, isoniazid | Retreatment | Confirmed active case |
| 1130 | Lung shadow for 4 days | Lung CT showed infectious lesions in the left upper lung, which may be tuberculosis | Negative | Negative | Positive | NA | Negative | NA | Primary treatment | Confirmed active case |
| 1131 | Cough and expectoration for half a month | Lung CT showed nodular shadows in both upper lungs | Negative | Positive | Positive | NA | NA | Streptomycin, rifampicin, isoniazid | Retreatment | Confirmed active case |
| 1132 | Cough and expectoration for 1 month | Lung CT showed tuberculosis in both lungs with small cavities in the left upper lung | Negative | Positive | Negative | NA | NA | Streptomycin, rifampicin, isoniazid | Retreatment | Confirmed active case |
| 1133 | Fever for 1 month | Lung CT showed mass shadows in the upper lobe of the right lung and multiple patchy shadows in both lungs | One sputum smears were positive. | Negative | NA | NA | Positive | NA | Primary treatment | Confirmed active case |
| 1134 | Cough and expectoration for 1 year | Lung CT showed that there were scattered patches and cavity shadows in both lungs | One sputum smears were positive. | Negative | NA | NA | NA | NA | Primary treatment | Confirmed active case |
| 1135 | Cough and expectoration for 2 months | Lung CT showed that there were scattered patches and blurred shadows in both lungs | Negative | Positive | Positive | NA | NA | Non drug resistance | Primary treatment | Confirmed active case |
| 1136 | Chest tightness and shortness of breath for half a year | Lung CT showed tuberculosis in both lungs | Negative | NA | Positive | NA | NA | NA | Primary treatment | Confirmed active case |
| 1137 | Cough for 2 months | Lung CT showed scattered patches and nodules in both lungs | Two sputum smears were positive. | Positive | Positive | NA | Positive | Non drug resistance | Primary treatment | Confirmed active case |
| 1138 | Cough for 10 days | Lung CT showed multiple clustered nodules and patchy fuzzy shadows in both lungs, and there was a small cavity shadow in the right upper lung | One sputum smears were positive. | Positive | NA | NA | NA | NA | Primary treatment | Confirmed active case |
| 1139 | Cough, sputum and blood for 8 days | Lung CT showed multiple patchy consolidation and cavity formation in both lungs | One sputum smears were positive. | Positive | NA | NA | NA | NA | Primary treatment | Confirmed active case |
| 1140 | Hemoptysis for 1 week | Lung CT showed tuberculosis in both lungs and cavity formation in the upper lobe of the left lung | One sputum smears were positive. | Negative | Positive | NA | NA | Non drug resistance | Primary treatment | Confirmed active case |
| 1141 | Cough and expectoration for 2 months | Lung CT showed a large exudative lesion in the lower lobe of the left lung | One sputum smears were positive. | Positive | Positive | NA | Positive | Non drug resistance | Primary treatment | Confirmed active case |
| 1142 | Cough and expectoration for 3 years | Lung CT showed tuberculosis in the left lung | One sputum smears were positive. | Negative | Positive | NA | NA | Rifampicin | Retreatment | Confirmed active case |
| 1143 | Lung shadow for 3 days | Lung CT showed patchy consolidation in the lower lobe of the right lung | Negative | Negative | Positive | NA | Positive | Non drug resistance | Primary treatment | Confirmed active case |
| 1144 | Cough for 1 month | Lung CT showed a large mass shadow and cavity formation in the upper lobe of the left lung | One sputum smears were positive. | Positive | Positive | NA | NA | Non drug resistance | Primary treatment | Confirmed active case |
| 1145 | Cough, expectoration and fever for 6 days | Lung CT showed multiple patches and nodular hyperdense shadows in the right lower lung | One sputum smears were positive. | Positive | Positive | NA | Positive | Streptomycin, rifampicin, isoniazid | Primary treatment | Confirmed active case |
| 1146 | Chest pain for 4 days | Lung CT showed that there may be nodules with cavities in the lower lobe of the right lung | One sputum smears were positive. | Positive | Positive | NA | Positive | Streptomycin | Primary treatment | Confirmed active case |
| 1147 | Cough and expectoration for 2 months | Lung CT showed patchy consolidation and cavity in both lungs | One sputum smears were positive. | Positive | NA | NA | NA | Non drug resistance | Primary treatment | Confirmed active case |
| 1148 | Cough and expectoration for 3 weeks | Lung CT showed tuberculosis in the left lung | Negative | Positive | Positive | NA | NA | Rifampicin, streptomycin, fluoroquinolone | Primary treatment | Confirmed active case |
| 1149 | Fever for 2 months | Lung CT showed chestnut shadow on both lungs. It is considered that it is bloody disseminated pulmonary tuberculosis | NA | Positive | Positive | NA | NA | Non drug resistance | Primary treatment | Confirmed active case |
| 1150 | Cough for 1 week | Lung CT showed a patchy high-density shadow in the left upper lung and a patchy and cavitary shadow in the right lower lung | Negative | Positive | Positive | NA | NA | Non drug resistance | Primary treatment | Confirmed active case |
| 1151 | Cough and expectoration for 5 days | Lung CT showed patches, nodules and cavities in the right upper lung | One sputum smears were positive. | Positive | Positive | NA | NA | Non drug resistance | Primary treatment | Confirmed active case |
| 1152 | Cough and expectoration for 1 year | Lung CT showed tuberculosis with cavity in both lungs | Negative | Positive | Positive | NA | NA | Rifampicin, isoniazid, ethambutol | Retreatment | Confirmed active case |
| 1153 | Cough and expectoration for several days | Lung CT showed tuberculosis in both lungs | Negative | Negative | Positive | NA | NA | Rifampicin | Primary treatment | Confirmed active case |
| 1154 | Cough and expectoration for 1 year | Lung CT showed patchy cord shadows and multiple cavities in the left upper lung | Negative | Positive | Positive | NA | Positive | Rifampicin, isoniazid | Primary treatment | Confirmed active case |
| 1155 | Lung shadow for 5 days | Lung CT showed that there were infectious lesions in both lungs, which was considered to be tuberculosis | One sputum smears were positive. | NA | Positive | NA | Positive | NA | Primary treatment | Confirmed active case |
| 1156 | Antituberculosis treatment for 2 months | Lung CT showed nodules and exudative shadows in the upper lobe of the left lung | One sputum smears were positive. | Positive | Positive | NA | NA | Streptomycin, rifampicin, isoniazid | Primary treatment | Confirmed active case |
| 1157 | Antituberculosis treatment for 7 months | Lung CT showed tuberculosis with cavity in both lungs | One sputum smears were positive. | Negative | NA | NA | NA | NA | Primary treatment | Confirmed active case |
| 1158 | Chest pain and discomfort for 1 week | Lung CT shows that the left lung may be tuberculosis | One sputum smears were positive. | Positive | Positive | NA | Positive | Non drug resistance | Primary treatment | Confirmed active case |
| 1159 | Cough and expectoration for 1 month | Lung CT showed scattered inflammatory lesions in both lungs and consolidation in the upper lobe of the left lung.Tuberculosis needs to be excluded. | Two sputum smears were positive. | Positive | Positive | NA | NA | Streptomycin, rifampicin, isoniazid | Primary treatment | Confirmed active case |
| 1160 | Lung shadow for half a month | Lung CT showed possible infection or tuberculosis in the upper lobe of the right lung | Negative | Negative | Positive | NA | Positive | Non drug resistance | Primary treatment | Confirmed active case |
| 1161 | Cough and expectoration for 3 months | NA | One sputum smears were positive. | Positive | Positive | NA | Positive | Non drug resistance | Primary treatment | Confirmed active case |
| 1162 | Cough and expectoration for 1 week | Lung CT showed tuberculosis in the upper lobe of the right lung | One sputum smears were positive. | Positive | Positive | NA | NA | Rifampicin | Primary treatment | Confirmed active case |
| 1163 | Cough for half a month | Lung CT showed that there were patches with small cavity shadow in the upper lobe of the left lung | One sputum smears were positive. | Positive | Positive | NA | NA | Non drug resistance | Primary treatment | Confirmed active case |
| 1164 | Cough for half a month | Lung CT showed multiple nodules and patches in the right lung | One sputum smears were positive. | NA | Positive | NA | NA | NA | Primary treatment | Confirmed active case |
| 1165 | Fever and hemoptysis for 20 days | Lung CT showed mass shadow with cavity formation in the right upper lung | Two sputum smears were positive. | Positive | Positive | NA | NA | Streptomycin, rifampicin, isoniazid | Retreatment | Confirmed active case |
| 1166 | Lung shadow for half a month | Lung CT showed tuberculosis in both lungs with cavity formation in the upper lobe of the left lung | Two sputum smears were positive. | Positive | NA | NA | NA | Isoniazid | Primary treatment | Confirmed active case |
| 1167 | Cough and expectoration for 1 month | Lung CT showed tuberculosis in both lungs with cavity formation in the left lower lung | One sputum smears were positive. | Positive | Positive | NA | NA | Non drug resistance | Primary treatment | Confirmed active case |
| 1168 | Cough and expectoration for 1 month | Lung CT showed tuberculosis in both lungs with cavity in the right upper lung | Three sputum smears were positive. | Positive | Positive | NA | NA | Rifampicin, isoniazid, ethambutol | Primary treatment | Confirmed active case |
| 1169 | Cough and expectoration for 1 month | Lung CT showed nodules and cavities in both upper lungs | Negative | Negative | Positive | NA | NA | NA | Primary treatment | Confirmed active case |
| 1170 | Cough and expectoration for 4 months | Lung CT showed multiple patchy shadows in both lungs and consolidation in the middle lobe of the right lung | Three sputum smears were positive. | Positive | Positive | NA | Positive | Streptomycin, rifampicin, isoniazid | Primary treatment | Confirmed active case |
| 1171 | Cough and expectoration for 1 week | Lung CT showed a small amount of tuberculosis in both lungs | NA | NA | Positive | NA | NA | Non drug resistance | Retreatment | Confirmed active case |
| 1172 | Cough and expectoration for 7 months | Lung CT showed tuberculosis with left upper pulmonary cavity in both lungs | Negative | Negative | Positive | NA | Positive | Non drug resistance | Primary treatment | Confirmed active case |
| 1173 | Fever for 20 days | Lung CT showed diffuse chestnut shadow in both lungs | NA | NA | Positive | NA | NA | NA | Primary treatment | Confirmed active case |
| 1174 | Cough and expectoration for 4 days | Lung CT showed cavity formation in the upper lobe of the right lung | NA | Positive | NA | NA | Positive | Non drug resistance | Primary treatment | Confirmed active case |
| 1175 | Cough and expectoration for 6 days | Lung CT showed tuberculosis in the upper lobe of the left lung | Negative | Negative | Positive | NA | NA | NA | Retreatment | Confirmed active case |
| 1176 | Lung shadow for 8 months | Lung CT showed infectious lesions in the upper lobes of both lungs with cavity formation. It is considered to be tuberculosis | Negative | Positive | Positive | NA | NA | Isoniazid, rifampicin, streptomycin, fuquinolone | Primary treatment | Confirmed active case |
| 1177 | Cough and expectoration for 2 months | Lung CT showed patchy shadows in the middle lobe of the right lung | One sputum smears were positive. | Positive | Positive | NA | NA | Non drug resistance | Primary treatment | Confirmed active case |
| 1178 | Cough and expectoration for 5 days | Lung CT showed tuberculosis in both lungs and cavity in the left lung | One sputum smears were positive. | NA | Positive | NA | NA | Non drug resistance | Retreatment | Confirmed active case |
| 1179 | Antituberculosis treatment for 1 month | Lung CT showed scattered tuberculosis in both lungs | Negative | Positive | Positive | NA | Positive | Streptomycin, rifampicin, isoniazid, ethambutol | Primary treatment | Confirmed active case |
| 1180 | Cough and expectoration for 3 months | Lung CT showed scattered patchy high-density shadows and multiple cavity shadows in both lungs | One sputum smears were positive. | Positive | NA | NA | NA | Non drug resistance | Retreatment | Confirmed active case |
| 1181 | Cough and expectoration for half a month | Lung CT showed tuberculosis with multiple cavities in both lungs | Two sputum smears were positive. | Positive | NA | NA | Positive | Non drug resistance | Primary treatment | Confirmed active case |
| 1182 | Cough and expectoration for 30 years | Lung CT showed tuberculosis with cavity formation in both lungs | One sputum smears were positive. | Positive | NA | NA | Positive | Non drug resistance | Primary treatment | Confirmed active case |
| 1183 | Fever and cough for half a month | Lung CT showed tuberculosis with cavity in both lungs | One sputum smears were positive. | Positive | Positive | NA | NA | Non drug resistance | Retreatment | Confirmed active case |
| 1184 | Fever for more than 1 month | Lung CT showed infectious lesions in both lungs, which may be tuberculosis | Negative | Negative | Positive | NA | NA | Rifampicin | Primary treatment | Confirmed active case |
| 1185 | Cough and expectoration for 1 year | Lung CT showed infectious lesions in both lungs | One sputum smears were positive. | Positive | Positive | NA | NA | Non drug resistance | Primary treatment | Confirmed active case |
| 1186 | Cough and expectoration for 2 months | Lung CT showed scattered nodules in the right lung | One sputum smears were positive. | Positive | Positive | NA | NA | Non drug resistance | Primary treatment | Confirmed active case |
| 1187 | Cough and expectoration for 3 months | Lung CT showed tuberculosis | One sputum smears were positive. | Positive | Positive | NA | NA | Streptomycin | Primary treatment | Confirmed active case |
| 1188 | Lung shadow for 1 month | Lung CT showed multiple small nodules in both lungs | Negative | Negative | Positive | NA | NA | Non drug resistance | Primary treatment | Confirmed active case |
| 1189 | Cough and expectoration for 1 week | Lung CT showed a patchy shadow in the tongue lobe of the left lung and a small amount of patchy shadow in the left lower lung | Three sputum smears were positive. | Positive | NA | NA | Positive | Rifampicin | Primary treatment | Confirmed active case |
| 1190 | Cough and expectoration for 4 months | Lung CT showed diffuse lesions in both lungs, which was secondary tuberculosis with cavity formation | Negative | Negative | Positive | NA | NA | Streptomycin, rifampicin | Primary treatment | Confirmed active case |
| 1191 | Cough and expectoration for half a month | Lung CT showed tuberculosis in both lungs | Negative | Positive | Positive | NA | NA | Non drug resistance | Primary treatment | Confirmed active case |
| 1192 | Cough and expectoration for 2 years | Lung CT showed diffuse ground glass changes and cord shadows in both lungs | Negative | Positive | Positive | NA | Negative | Non drug resistance | Primary treatment | Confirmed active case |
| 1193 | Fever for 1 week | Lung CT showed tuberculosis with cavity formation in both lungs | Negative | Positive | Positive | NA | Positive | Non drug resistance | Primary treatment | Confirmed active case |
| 1194 | Cough and expectoration for 1 year, sputum and blood for 9 months | Lung CT showed tuberculosis with cavity in both lungs | One sputum smears were positive. | Negative | Positive | NA | NA | Non drug resistance | Primary treatment | Confirmed active case |
| 1195 | Cough and expectoration for 1 month | Lung CT shows that it may be pulmonary tuberculosis | Three sputum smears were positive. | Positive | Positive | NA | Positive | Non drug resistance | Primary treatment | Confirmed active case |
| 1196 | Cough and expectoration for 4 months | Lung CT showed patchy fuzzy elevated shadow in the left lung | One sputum smears were positive. | Positive | NA | NA | NA | Non drug resistance | Primary treatment | Confirmed active case |
| 1197 | Cough for half a month | Lung CT shows that the first consideration is tuberculosis | Negative | Negative | Positive | NA | Positive | Non drug resistance | Primary treatment | Confirmed active case |
| 1198 | Upper and lower limb paralysis for 3 days | Lung CT showed tuberculosis in both lungs | Negative | Positive | Positive | NA | Positive | Isoniazid | Primary treatment | Confirmed active case |
| 1199 | Lung shadow for 1 week | Lung CT showed that pulmonary tuberculosis could not be ruled out | Negative | Positive | Positive | NA | NA | Non drug resistance | Primary treatment | Confirmed active case |
| 1200 | Cough and expectoration for half a month | Lung CT showed infection in both lungs with cavity formation, which is considered to be tuberculosis | Negative | Positive | Positive | NA | Positive | Non drug resistance | Primary treatment | Confirmed active case |
| 1201 | Cough for 1 month | Lung CT showed patchy shadows in both lungs and cavities in the left upper lung | One sputum smears were positive. | Positive | Positive | NA | NA | Non drug resistance | Primary treatment | Confirmed active case |
| 1202 | Chest tightness for 1 month | Lung CT showed multiple nodules in the right lung and small vacuoles in the right upper lung | One sputum smears were positive. | Positive | Positive | NA | NA | Streptomycin | Primary treatment | Confirmed active case |
| 1203 | Cough and expectoration for 1 year and hemoptysis for 4 days | Lung CT showed patch and cavity shadow in the right upper lung and mass shadow in the right hilum | One sputum smears were positive. | Positive | Positive | NA | NA | Non drug resistance | Primary treatment | Confirmed active case |
| 1204 | Cough and expectoration for 2 weeks | Lung CT showed multiple patchy shadows in the right lung | One sputum smears were positive. | Positive | Positive | NA | NA | Non drug resistance | Primary treatment | Confirmed active case |
| 1205 | Coughing repeatedly for 4 years and hemoptysis for 4 days | Lung CT showed multiple patchy nodules and cavity formation in both lungs | One sputum smears were positive. | Positive | Positive | NA | NA | Streptomycin, rifampicin, isoniazid | Retreatment | Confirmed active case |
| 1206 | Cough and expectoration for 2 months | Lung CT showed nodules and scattered patches in both lungs | Two sputum smears were positive. | Positive | Positive | NA | NA | Non drug resistance | Primary treatment | Confirmed active case |
| 1207 | Left hip pain for 3 days | Lung CT showed tuberculosis in the right middle lung | One sputum smears were positive. | Positive | Positive | NA | NA | Non drug resistance | Retreatment | Confirmed active case |
| 1208 | Cough, expectoration and fever for 10 days | Lung CT showed exudative shadows in the upper lobe of the right lung and patches and consolidation shadows in the middle lobe of the right lung | Three sputum smears were positive. | Positive | Positive | NA | Positive | Streptomycin, rifampicin, isoniazid | Primary treatment | Confirmed active case |
| 1209 | Cough and expectoration for 2 months | Lung CT showed patchy shadows in both lungs | One sputum smears were positive. | Positive | Positive | NA | NA | Rifampicin, isoniazid | Retreatment | Confirmed active case |
| 1210 | Chest tightness and shortness of breath for half a month | Lung CT showed tuberculosis in both lungs | NA | NA | Positive | NA | Positive | Non drug resistance | Primary treatment | Confirmed active case |
| 1211 | Cough for 2 months | Lung CT showed patchy shadows in the right upper middle lung | Negative | Negative | Positive | NA | NA | Non drug resistance | Primary treatment | Confirmed active case |
| 1212 | Cough and expectoration for 3 months | Lung CT showed multiple patches and nodules in both lungs | One sputum smears were positive. | Positive | Positive | NA | Positive | Streptomycin, isoniazid | Primary treatment | Confirmed active case |
| 1213 | Hemoptysis for 2 days | Lung CT showed tuberculosis in the upper lobe with cavity formation in the right upper lung | One sputum smears were positive. | Positive | Positive | NA | Positive | Non drug resistance | Primary treatment | Confirmed active case |
| 1214 | Cough and expectoration for 1 year | Lung CT showed tuberculosis with cavity in both lungs | One sputum smears were positive. | Negative | Negative | NA | NA | Non drug resistance | Primary treatment | Confirmed active case |
| 1215 | Cough and expectoration for 1 month | Lung CT showed tuberculosis in both lungs with the formation of cavity in the upper lobe of the right lung | One sputum smears were positive. | Positive | Positive | NA | Positive | Non drug resistance | Retreatment | Confirmed active case |
| 1216 | Lung shadow for 1 day | Lung CT showed tuberculosis in both lungs | Negative | Negative | Positive | NA | Positive | NA | Primary treatment | Confirmed active case |
| 1217 | Cough for 1 month and hemoptysis for 5 days | Lung CT showed tuberculosis with cavity formation in both lungs | One sputum smears were positive. | Positive | Positive | NA | NA | Non drug resistance | Retreatment | Confirmed active case |
| 1218 | Cough for 2 months | Lung CT showed that tuberculosis was the first consideration | One sputum smears were positive. | Positive | Positive | NA | Positive | Non drug resistance | Primary treatment | Confirmed active case |
| 1219 | Cough and expectoration for 1 month | Lung CT showed tuberculosis with cavity in both lungs | One sputum smears were positive. | Positive | Positive | NA | Positive | Streptomycin, rifampicin, isoniazid | Primary treatment | Confirmed active case |
| 1220 | Repeated cough and expectoration for 1 month | Lung CT showed consolidation and small cavities in the right middle and lower lung and scattered speckles in the lower lobe of the left lung | Two sputum smears were positive. | Positive | Positive | NA | NA | Rifampicin | Primary treatment | Confirmed active case |
| 1221 | Cough and expectoration for 1 month | Lung CT showed patchy shadows in both upper lungs and cavity formation in the left upper lung | Three sputum smears were positive. | Positive | Positive | NA | Positive | Non drug resistance | Primary treatment | Confirmed active case |
| 1222 | Cough and expectoration for 2 months | Lung CT showed scattered nodules, spots, patches and cavities in both lungs | One sputum smears were positive. | Positive | Positive | NA | Positive | Rifampicin, isoniazid, fluoroquinolone | Retreatment | Confirmed active case |
| 1223 | Cough and expectoration for 1 month | Lung CT showed plaques and consolidation with cavity formation in the left lung | Three sputum smears were positive. | Positive | Positive | NA | NA | Rifampicin, isoniazid | Retreatment | Confirmed active case |
| 1224 | Cough and expectoration for 10 years | Lung CT showed cavity formation in the lower lobe of the left lung | Two sputum smears were positive. | Positive | Positive | NA | NA | Non drug resistance | Primary treatment | Confirmed active case |
| 1225 | Cough and expectoration for 6 years | Lung CT showed tuberculosis in both lungs | Three sputum smears were positive. | Positive | Positive | NA | NA | Streptomycin, rifampicin, isoniazid, ethambutol | Retreatment | Confirmed active case |
| 1226 | Anti tuberculosis treatment for 21 months | Lung CT showed tuberculosis in both lungs | Three sputum smears were positive. | Positive | Positive | NA | NA | Isoniazid | Retreatment | Confirmed active case |
| 1227 | Shortness of breath for 2 months | Lung CT showed mass, exudative shadow and small cavity in the upper lobe of the right lung | Negative | Positive | Positive | NA | Positive | Non drug resistance | Primary treatment | Confirmed active case |
| 1228 | Hemoptysis for 10 days | Lung CT showed tuberculosis with cavity in both lungs | Two sputum smears were positive. | Positive | Negative | NA | NA | Streptomycin, rifampicin, isoniazid, ethambutol | Primary treatment | Confirmed active case |
| 1229 | Cough and expectoration for 1 week | Lung CT showed that there were mass shadows with cavity formation in the upper lobe of both upper lungs and the lower lobe of the right lung | One sputum smears were positive. | Positive | Positive | NA | NA | Non drug resistance | Primary treatment | Confirmed active case |
| 1230 | Fever for 20 days | Lung CT showed tuberculosis | One sputum smears were positive. | Negative | Positive | NA | NA | Non drug resistance | Primary treatment | Confirmed active case |
| 1231 | Cough and expectoration for 1 year | Lung CT showed tuberculosis in both lungs | One sputum smears were positive. | Positive | Positive | NA | NA | Non drug resistance | Primary treatment | Confirmed active case |
| 1232 | Cough and expectoration for 10 days | Lung CT showed scattered tuberculosis in both lungs | One sputum smears were positive. | Positive | Positive | NA | NA | Rifampicin | Primary treatment | Confirmed active case |
| 1233 | Cough and expectoration for 1 month | Lung CT showed patches and nodules in the left upper lung | One sputum smears were positive. | Positive | Positive | NA | NA | Non drug resistance | Primary treatment | Confirmed active case |
| 1234 | Cough and expectoration for 2 years | Lung CT showed tuberculosis in both lungs | One sputum smears were positive. | Positive | NA | NA | NA | Non drug resistance | Primary treatment | Confirmed active case |
| 1235 | Anti tuberculosis treatment for 2 months | Lung CT showed tuberculosis in both lungs | Negative | Negative | Positive | NA | NA | Rifampicin | Primary treatment | Confirmed active case |
| 1236 | Cough and expectoration for 1 month | Lung CT showed that there were scattered patches and nodules in both lungs. It is considered to be tuberculosis | Negative | Positive | Negative | NA | NA | Non drug resistance | Primary treatment | Confirmed active case |
| 1237 | Cough and expectoration for 2 months | Lung CT showed tuberculosis in both lungs | One sputum smears were positive. | Negative | Positive | NA | NA | Non drug resistance | Primary treatment | Confirmed active case |
| 1238 | Cough and expectoration for 1 month | Lung CT showed patches and nodules in the right upper lung | Negative | Positive | Negative | NA | NA | Rifampicin, isoniazid, ethambutol | Primary treatment | Confirmed active case |
| 1239 | Cough and expectoration for half a year | Lung CT showed tuberculosis in both lungs | Three sputum smears were positive. | Positive | Positive | NA | Positive | Non drug resistance | Primary treatment | Confirmed active case |
| 1240 | Cough and expectoration for 1 year | Lung CT showed nodular shadow in the posterior segment of the upper lobe of the right lung | Negative | Positive | Positive | NA | Positive | Non drug resistance | Primary treatment | Confirmed active case |
| 1241 | Cough and expectoration for 2 weeks | Lung CT showed mass shadow in the right hilum and scattered nodule shadow in the right lower lobe | One sputum smears were positive. | Positive | Positive | NA | NA | Non drug resistance | Primary treatment | Confirmed active case |
| 1242 | Cough and expectoration for half a year | Lung CT showed tuberculosis in both lungs | One sputum smears were positive. | Positive | Positive | NA | NA | Non drug resistance | Primary treatment | Confirmed active case |
| 1243 | Cough and expectoration for 2 years and hemoptysis for 10 days | Lung CT showed tuberculosis in both lungs with cavity in the lower right lung | One sputum smears were positive. | Positive | Positive | NA | NA | Rifampicin | Retreatment | Confirmed active case |
| 1244 | Cough and expectoration for 2 years | Lung CT showed multiple pulmonary tuberculosis in two lungs.There are mass shadows and cavities in the left upper lung | One sputum smears were positive. | Negative | Positive | NA | Negative | Non drug resistance | Primary treatment | Confirmed active case |
| 1245 | Cough and expectoration for 3 days | Lung CT showed patchy exudation in the right upper lung | Negative | Negative | Positive | NA | NA | Non drug resistance | Retreatment | Confirmed active case |
| 1246 | Cough and expectoration for 7 months | Lung CT showed tuberculosis in both upper lungs | Negative | Negative | Positive | NA | NA | Rifampicin | Primary treatment | Confirmed active case |
| 1247 | Cough and expectoration for 10 days | Lung CT showed patches and consolidation in the right upper lung and patches and strips in the right lower lung | One sputum smears were positive. | Positive | Positive | NA | Positive | Isoniazid | Primary treatment | Confirmed active case |
| 1248 | Hemoptysis for 20 days | Lung CT showed scattered nodules and patchy shadows in the left upper, middle and lower lung | Negative | Positive | Positive | NA | NA | Rifampicin, isoniazid | Primary treatment | Confirmed active case |
| 1249 | Cough and expectoration for half a month | Lung CT showed patchy shadows in the upper lobe of the right lung | One sputum smears were positive. | Positive | Positive | NA | NA | Streptomycin | Primary treatment | Confirmed active case |
| 1250 | Cough and expectoration for 3 months | Lung CT showed tuberculosis in both lungs | One sputum smears were positive. | Positive | Positive | NA | Positive | Non drug resistance | Primary treatment | Confirmed active case |
| 1251 | Cough and expectoration for 3 days | Lung CT showed spots and strips of density shadow in the left lower lung | Two sputum smears were positive. | Positive | Positive | NA | Positive | Non drug resistance | Primary treatment | Confirmed active case |
| 1252 | Cough and expectoration for half a year | Lung CT showed multiple patchy exudative shadows in the right lung and scattered patchy shadows in the left lung | One sputum smears were positive. | Positive | Negative | NA | NA | Non drug resistance | Primary treatment | Confirmed active case |
| 1253 | Cough and expectoration for 1 month | Lung CT showed tuberculosis in the right lung | Negative | Negative | Positive | NA | NA | Non drug resistance | Primary treatment | Confirmed active case |
| 1254 | Cough and expectoration for 4 months | Lung CT showed tuberculosis in both lungs | One sputum smears were positive. | Positive | Positive | NA | NA | Non drug resistance | Primary treatment | Confirmed active case |
| 1255 | Cough and expectoration for 4 years | Lung CT showed nodular and spotted hyperdense shadows in the left upper lung | Negative | Positive | Positive | NA | NA | Streptomycin, rifampicin, isoniazid | Retreatment | Confirmed active case |
| 1256 | Cough and expectoration for half a year | Lung CT showed multiple lesions and cavity formation in both lungs | Three sputum smears were positive. | Positive | Positive | NA | NA | Rifampicin, isoniazid | Retreatment | Confirmed active case |
| 1257 | Fever for 3 months | Lung CT showed a few spots on both upper lungs | Negative | Negative | Positive | NA | NA | Non drug resistance | Primary treatment | Confirmed active case |
| 1258 | Fatigue and emaciation for 3 months | Lung CT showed multiple patches and cord shadows in both lungs | Three sputum smears were positive. | Negative | NA | NA | Positive | NA | Primary treatment | Confirmed active case |
| 1259 | Cough and expectoration for 20 days | NA | One sputum smears were positive. | Positive | Positive | NA | NA | Non drug resistance | Retreatment | Confirmed active case |
| 1260 | Lung shadow for 1 week | Lung CT showed patches and nodules with cavity formation in the left lower lung | One sputum smears were positive. | Positive | Positive | NA | NA | Fluoroquinolone, rifampicin | Primary treatment | Confirmed active case |
| 1261 | Cough and expectoration for 10 months | Lung CT showed tuberculosis in both upper lungs | Negative | Negative | Positive | NA | NA | Rifampicin | Retreatment | Confirmed active case |
| 1262 | Cough and expectoration for 2 months | Lung CT showed patches and nodules in both lungs and solid cavity in the upper left lung | One sputum smears were positive. | Positive | Positive | NA | NA | Streptomycin, rifampicin, isoniazid | Retreatment | Confirmed active case |
| 1263 | Cough and expectoration for 4 months | Lung CT showed tuberculosis with multiple cavities in both lungs | One sputum smears were positive. | Positive | Positive | NA | Positive | Non drug resistance | Primary treatment | Confirmed active case |
| 1264 | Cough and expectoration for 1 year | Lung CT showed that there were large cavities in the right upper lung, scattered patches and spotted increased density shadows in the right lower lung, and scattered patches and stripes in the left lung | Three sputum smears were positive. | Positive | Positive | NA | NA | Streptomycin, rifampicin, isoniazid | Retreatment | Confirmed active case |
| 1265 | Cough and expectoration for 1 month | Lung CT showed scattered nodules and patchy high-density shadows in both lungs, which may be tuberculosis | Negative | Positive | Positive | NA | NA | Non drug resistance | Primary treatment | Confirmed active case |
| 1266 | Cough and expectoration for 6 days | Lung CT showed tuberculosis with cavity in the left upper lung | Negative | Negative | Positive | NA | NA | Non drug resistance | Primary treatment | Confirmed active case |
| 1267 | Anti tuberculosis treatment for 10 months | Lung CT showed tuberculosis with cavity formation in the upper lobe of the right lung | Two sputum smears were positive. | Positive | Negative | NA | NA | Streptomycin, rifampicin, isoniazid, ethambutol | Retreatment | Confirmed active case |
| 1268 | Cough and expectoration for half a year | Lung CT showed that there were spots, stripes, high-density shadows and cavities in both lungs | Three sputum smears were positive. | Negative | Positive | NA | NA | Non drug resistance | Primary treatment | Confirmed active case |
| 1269 | Cough and expectoration for half a month | Lung CT showed extensive patchy increased density shadow in both lungs | Two sputum smears were positive. | Positive | NA | NA | NA | Non drug resistance | Primary treatment | Confirmed active case |
| 1270 | Hemoptysis for 1 month | Lung CT shows that tuberculosis may be in the right lung | Negative | Negative | Positive | NA | NA | Rifampicin | Retreatment | Confirmed active case |
| 1271 | Cough and expectoration for 10 days | Lung CT showed patch and cavity shadow in the right upper lung and multiple small nodule lesions in both lungs | Negative | Negative | Positive | NA | NA | Rifampicin | Primary treatment | Confirmed active case |
| 1272 | Cough and expectoration for 1 year | Lung CT showed tuberculosis with multiple cavities in both lungs | Three sputum smears were positive. | Positive | Positive | NA | NA | Streptomycin, fluoroquinolone | Retreatment | Confirmed active case |
| 1273 | Cough and expectoration for 1 month | Lung CT showed extensive chestnut granular density increase shadow in both lungs | Negative | Positive | NA | NA | NA | Non drug resistance | Primary treatment | Confirmed active case |
| 1274 | Antituberculosis treatment for 2 months | Lung CT showed a patchy high-density shadow in the upper lobe of the left lung | Three sputum smears were positive. | Negative | Positive | NA | NA | NA | Primary treatment | Confirmed active case |
| 1275 | Cough and expectoration for 10 days | Lung CT showed multiple patches, nodules and cavities in both lungs | Three sputum smears were positive. | Positive | Positive | NA | NA | Non drug resistance | Primary treatment | Confirmed active case |
| 1276 | Cough and expectoration for 1 month | Lung CT showed pulmonary tuberculosis | Negative | Positive | Positive | NA | Positive | Rifampicin, ethambutol | Retreatment | Confirmed active case |
| 1277 | Cough and expectoration for 1 year | Lung CT showed that there were scattered patches and spots of increased density in the upper, middle and lower lungs, and the formation of cavities in the left upper lung | One sputum smears were positive. | Positive | Positive | NA | NA | Non drug resistance | Primary treatment | Confirmed active case |
| 1278 | Fever for 1 month | Lung CT showed that there were striped and irregular patches and nodular high-density shadows in both lungs, and there were multiple cavities and honeycombs in the upper lobe of the left lung | Negative | Negative | Positive | NA | Positive | Non drug resistance | Primary treatment | Confirmed active case |
| 1279 | Cough and expectoration for 25 years | NA | Three sputum smears were positive. | Positive | Positive | NA | NA | Rifampicin, isoniazid, streptomycin, ethambutol, fluoroquinolone | Retreatment | Confirmed active case |
| 1280 | Cough and expectoration for 2 years | NA | Two sputum smears were positive. | Positive | Positive | NA | NA | Isoniazid, rifampicin, streptomycin, fuquinolone | Retreatment | Confirmed active case |
| 1281 | Lung CT showed cough and expectoration for half a year | Lung CT showed diffuse lesions and chestnut granular tuberculosis in both lungs | Negative | Positive | Positive | NA | Positive | Non drug resistance | Primary treatment | Confirmed active case |
| 1282 | Cough and expectoration for 1 month | Lung CT showed that there were patches and spots of increased density shadow and cavity formation in the left upper and lower lungs | Negative | Positive | Positive | NA | NA | Rifampicin, isoniazid | Primary treatment | Confirmed active case |
| 1283 | Cough and expectoration for 3 months | Lung CT showed spots and patches in the right upper middle lung and left upper middle lower lung | One sputum smears were positive. | Positive | Positive | NA | NA | Non drug resistance | Primary treatment | Confirmed active case |
| 1284 | Lung shadow for 1 week | Lung CT showed that there was a high possibility of tuberculosis in the right lower lung | Negative | Negative | Positive | NA | NA | Rifampicin | Primary treatment | Confirmed active case |
| 1285 | Cough and expectoration for half a month | Lung CT showed that it may be tuberculosis with inflammation of the left lung | One sputum smears were positive. | Positive | Positive | NA | NA | Non drug resistance | Primary treatment | Confirmed active case |
| 1286 | Cough and expectoration for 10 months | Lung CT showed scattered cord shadows in both lungs | Negative | Negative | Positive | NA | NA | Non drug resistance | Primary treatment | Confirmed active case |
| 1287 | Fever for 4 months | Lung CT showed infection in both lungs. Tuberculosis was the first consideration | Negative | Positive | Positive | NA | NA | Non drug resistance | Primary treatment | Confirmed active case |
| 1288 | NA | Lung CT showed patchy shadow and cavity formation in the upper lobe of the right lung | Two sputum smears were positive. | Positive | Positive | NA | Positive | Rifampicin, isoniazid | Primary treatment | Confirmed active case |
| 1289 | Fever for 9 years | Lung CT showed lesions and cavities in the upper lobe of the left lung, which may be tuberculosis | Two sputum smears were positive. | Positive | Positive | NA | NA | Streptomycin, isoniazid, ethambutol | Retreatment | Confirmed active case |
| 1290 | Cough and expectoration for 8 months | Lung CT showed scattered patches and nodules in both lungs and cavities in the upper left lung | One sputum smears were positive. | Positive | Negative | NA | NA | Non drug resistance | Primary treatment | Confirmed active case |
| 1291 | Cough and expectoration for 1 month and hemoptysis for 2 days | Lung CT showed lesions in both lungs and cavities in the right upper lung | Two sputum smears were positive. | Positive | Positive | NA | NA | Non drug resistance | Retreatment | Confirmed active case |
| 1292 | Anti tuberculosis treatment for 16 months | Lung CT showed tuberculosis in both lungs | Three sputum smears were positive. | Positive | Positive | NA | NA | Rifampicin, isoniazid, streptomycin, ethambutol, fluoroquinolone | Primary treatment | Confirmed active case |
| 1293 | Cough and expectoration for 10 days | Lung CT showed scattered spots and nodules in the upper right lung | One sputum smears were positive. | Positive | Positive | NA | NA | Non drug resistance | Primary treatment | Confirmed active case |
| 1294 | Cough and expectoration for 2 months, sputum and blood for 2 months | Lung CT showed scattered spots and nodules in the upper right lung | One sputum smears were positive. | Positive | Positive | NA | Positive | Non drug resistance | Primary treatment | Confirmed active case |
| 1295 | Cough and expectoration for half a year | Lung CT showed tuberculosis in both lungs | One sputum smears were positive. | Negative | Positive | NA | NA | Non drug resistance | Retreatment | Confirmed active case |
| 1296 | Fever for 10 days | Lung CT showed tuberculosis in the right lung | Negative | Negative | Positive | NA | NA | Streptomycin, rifampicin, isoniazid | Primary treatment | Confirmed active case |
| 1297 | Fever for 1 month | Lung CT showed patchy and nodular increased density in the posterior segment of the upper lobe tip of the left lung and the base of the lower lobe of the right lung | Negative | Negative | Positive | NA | Positive | Rifampicin | Primary treatment | Confirmed active case |
| 1298 | Cough and expectoration for 20 years | Lung CT showed tuberculosis in both lungs with multiple cavities in the right lung | One sputum smears were positive. | Positive | Positive | NA | NA | Non drug resistance | Primary treatment | Confirmed active case |
| 1299 | Cough and expectoration for 1 year | Lung CT showed tuberculosis and cavity in both lungs | Three sputum smears were positive. | Positive | Positive | NA | NA | Rifampicin, isoniazid | Retreatment | Confirmed active case |
| 1300 | Cough and expectoration for 1 month | Lung CT showed scattered patchy shadows in both lungs and mass shadows in the right upper lung | One sputum smears were positive. | Positive | Positive | NA | NA | Streptomycin | Primary treatment | Confirmed active case |
| 1301 | Cough and expectoration for 1 month | Lung CT showed diffuse lesions in both lungs and consolidation in the left upper lung, which may be tuberculosis | Negative | Negative | Positive | NA | Positive | Non drug resistance | Primary treatment | Confirmed active case |
| 1302 | Cough and expectoration for 1 month | Lung CT showed tuberculosis in both lungs with cavity formation in the right upper lung | Three sputum smears were positive. | Negative | Positive | NA | NA | Non drug resistance | Retreatment | Confirmed active case |
| 1303 | Cough and expectoration for 1 month | Lung CT showed multiple patches and nodules in both lungs | Three sputum smears were positive. | Positive | Positive | NA | NA | Non drug resistance | Primary treatment | Confirmed active case |
| 1304 | Lung shadow | Lung CT showed patches and cord like shadows in the left lung and small cavities in the lower lobe of the left lung | Two sputum smears were positive. | Positive | Positive | NA | Positive | Non drug resistance | Primary treatment | Confirmed active case |
| 1305 | Cough and expectoration for 1 year | Lung CT showed extensive tuberculosis in both lungs | Negative | Negative | Positive | NA | NA | Non drug resistance | Primary treatment | Confirmed active case |
| 1306 | Lung shadow for 9 months | Lung CT showed tuberculosis with cavity in the upper lobe of the right lung | Negative | Negative | Positive | NA | NA | Isoniazid, rifampicin, streptomycin, fuquinolone | Retreatment | Confirmed active case |
| 1307 | Cough and expectoration for 4 months | Lung CT showed tuberculosis in both lungs | Negative | Negative | Positive | NA | NA | NA | Primary treatment | Confirmed active case |
| 1308 | Cough and expectoration for 20 days | Lung CT showed tuberculosis with cavity formation in both lungs | Two sputum smears were positive. | Positive | Positive | NA | NA | Non drug resistance | Primary treatment | Confirmed active case |
| 1309 | Cough and expectoration for 8 months | Lung CT showed extensive patches and nodules in both lungs and cavity formation in the left upper lung | One sputum smears were positive. | Positive | Positive | NA | Positive | Non drug resistance | Primary treatment | Confirmed active case |
| 1310 | Cough and expectoration for 3 months | Lung CT showed patchy and patchy high-density shadows in the upper lobe of the right and left lungs | One sputum smears were positive. | Positive | Positive | NA | NA | Non drug resistance | Primary treatment | Confirmed active case |
| 1311 | Cough and expectoration for 4 months | Lung CT showed scattered patches and lumpy increased density shadows in the left lung | Three sputum smears were positive. | Positive | Positive | NA | NA | Non drug resistance | Primary treatment | Confirmed active case |
| 1312 | Hemoptysis for 1 week | Lung CT showed patchy increased density shadows in the upper, middle, lower and right upper lungs, and cavities in the left upper lung | Two sputum smears were positive. | Positive | NA | NA | NA | Isoniazid, rifampicin, streptomycin, fuquinolone | Primary treatment | Confirmed active case |
| 1313 | Anti tuberculosis treatment for 10 months | Lung CT showed tuberculosis with multiple cavities in both lungs | One sputum smears were positive. | Negative | Positive | NA | NA | Non drug resistance | Primary treatment | Confirmed active case |
| 1314 | Fever for 3 days | Lung CT showed patchy high-density shadows in both lungs | Negative | Positive | Positive | NA | Positive | Non drug resistance | Primary treatment | Confirmed active case |
| 1315 | Hemoptysis for 2 days | Lung CT showed cavitary tuberculosis in the right upper lung | Negative | Negative | Positive | NA | Negative | Rifampicin, isoniazid | Retreatment | Confirmed active case |
| 1316 | Numbness and weakness of both lower limbs for 3 weeks | Lung CT showed tuberculosis in both lungs | Negative | Negative | Positive | NA | Positive | Non drug resistance | Primary treatment | Confirmed active case |
| 1317 | Cough and expectoration for 10 days | Lung CT showed tuberculosis in both lungs | Three sputum smears were positive. | Positive | Positive | NA | Negative | Non drug resistance | Primary treatment | Confirmed active case |
| 1318 | Cough and expectoration for half a year | Lung CT showed tuberculosis in both lungs with multiple cavities in the right upper lung | Negative | Positive | Positive | NA | NA | Non drug resistance | Primary treatment | Confirmed active case |
| 1319 | Cough and expectoration for 1 year | Lung CT showed scattered patches, nodular shadows and cavity formation in the left lung | Negative | Negative | Positive | NA | NA | Isoniazid | Primary treatment | Confirmed active case |
| 1320 | Cough and expectoration for 10 days | Lung CT showed patches and local cavity shadow in the left upper lobe | One sputum smears were positive. | Negative | Positive | NA | NA | Non drug resistance | Primary treatment | Confirmed active case |
| 1321 | Cough, expectoration and fever for 1 month | Lung CT showed that there were spots and strips of high-density shadows in both lungs | One sputum smears were positive. | Positive | Positive | NA | NA | Streptomycin, rifampicin, isoniazid | Primary treatment | Confirmed active case |
| 1322 | Fever and cough for 10 days | Lung CT showed scattered patchy shadows in both lungs and large consolidation and cavity shadows in the right upper lung | One sputum smears were positive. | Positive | Positive | NA | NA | Non drug resistance | Primary treatment | Confirmed active case |
| 1323 | Cough and expectoration for 2 months | Lung CT showed large consolidation shadows in the upper lobe of the left lung and a few patchy shadows in the lower left lung | One sputum smears were positive. | Positive | NA | NA | Positive | Non drug resistance | Primary treatment | Confirmed active case |
| 1324 | Cough and expectoration for 3 months and hemoptysis for 3 days | Lung CT showed tuberculosis in both lungs with multiple cavities in the left lung | One sputum smears were positive. | Positive | Positive | NA | Positive | Non drug resistance | Primary treatment | Confirmed active case |
| 1325 | Hemoptysis for 7 days | Lung CT showed a few spots and patches on the right upper lung and more spots and patches on the upper, middle and lower left lung | Two sputum smears were positive. | Positive | Positive | NA | NA | Rifampicin | Retreatment | Confirmed active case |
| 1326 | Chest pain for 1 month | Lung CT showed multiple patches, nodules and cavities in both upper lungs | One sputum smears were positive. | Positive | Positive | NA | NA | Rifampicin | Primary treatment | Confirmed active case |
| 1327 | Anti tuberculosis treatment for 21 months | Lung CT showed tuberculosis and cavity formation in both lungs | Negative | Negative | Positive | NA | NA | Streptomycin, rifampicin, isoniazid | Primary treatment | Confirmed active case |
| 1328 | Antituberculosis treatment for 7 months | Lung CT showed tuberculosis in both lungs | Negative | Positive | Positive | NA | NA | Streptomycin, isoniazid | Primary treatment | Confirmed active case |
| 1329 | Cough and expectoration for half a month | Lung CT showed tuberculosis in both lungs | Negative | Positive | Positive | NA | Positive | Non drug resistance | Primary treatment | Confirmed active case |
| 1330 | Cough and expectoration for 10 days | Lung CT showed tuberculosis in the left lung and cavity formation in the left upper lung | Two sputum smears were positive. | Positive | Positive | NA | NA | NA | Primary treatment | Confirmed active case |
| 1331 | Cough and expectoration for 1 year | Lung CT showed patchy density increase shadow and small cavity shadow in the upper lobe of the right lung | Negative | Positive | Positive | NA | Positive | Non drug resistance | Primary treatment | Confirmed active case |
| 1332 | Cough and expectoration for 5 months | Lung CT showed that there were scattered patches, spots and nodular increased density shadows in the upper, middle and lower lungs, and there was cavity formation in the left upper lung | Negative | Negative | Positive | NA | NA | Non drug resistance | Primary treatment | Confirmed active case |
| 1333 | Anti tuberculosis treatment for 9 months | Lung CT showed tuberculosis in both lungs | Negative | Negative | Positive | NA | NA | Non drug resistance | Primary treatment | Confirmed active case |
| 1334 | Cough for 1 month | Lung CT showed scattered patches and nodules in both lungs | Negative | Positive | Positive | NA | NA | Streptomycin | Primary treatment | Confirmed active case |
| 1335 | Anti tuberculosis treatment for 34 months | Lung CT showed tuberculosis in both lungs with cavity formation in the lower left lobe | Two sputum smears were positive. | Positive | Positive | NA | NA | Rifampicin | Retreatment | Confirmed active case |
| 1336 | Cough and expectoration for 1 month | Lung CT showed consolidation and cavitations in the left upper lung and scattered patches and nodules in both lungs | One sputum smears were positive. | Positive | Positive | NA | Positive | Non drug resistance | Primary treatment | Confirmed active case |
| 1337 | Cough and expectoration for 20 days | Lung CT showed that there were scattered patches and consolidation shadows in the upper, middle and lower lungs | Negative | Negative | Positive | NA | Positive | Non drug resistance | Primary treatment | Confirmed active case |
| 1338 | Cough and expectoration for 1 month | Lung CT showed spots and patchy high density shadows in the dorsal segment of the upper lobe and lower lobe of the left lung | Negative | Negative | Positive | NA | Positive | Streptomycin | Primary treatment | Confirmed active case |
| 1339 | Cough, expectoration and hemoptysis for 5 days | Lung CT showed patchy increased density shadow in the right upper lung | Three sputum smears were positive. | Positive | Positive | NA | NA | Streptomycin, rifampicin, isoniazid, ethambutol | Primary treatment | Confirmed active case |
| 1340 | Chest tightness for 1 month | Lung CT showed multiple nodule shadows in the right lung and scattered strip shadows in the left lung | Negative | Negative | Positive | NA | Positive | NA | Primary treatment | Confirmed active case |
| 1341 | Fever and shortness of breath for 1 month | Lung CT showed tuberculosis in both lungs | Negative | Negative | Positive | NA | Positive | Non drug resistance | Primary treatment | Confirmed active case |
| 1342 | Cough and expectoration for 4 months | Lung CT showed scattered patches and speckled increased density shadows in the middle and lower parts of both lungs | One sputum smears were positive. | Positive | Positive | NA | NA | Non drug resistance | Primary treatment | Confirmed active case |
| 1343 | Lung shadow for 3 months | Lung CT showed tuberculosis in both upper lobes | Negative | Positive | Positive | NA | NA | Non drug resistance | Primary treatment | Confirmed active case |
| 1344 | Cough and expectoration for 16 days | Lung CT showed extensive patchy increased density shadows in both lung lobes and cavities in the left upper lung | One sputum smears were positive. | Positive | Positive | NA | Positive | Non drug resistance | Primary treatment | Confirmed active case |
| 1345 | Cough and expectoration for 1 week | Lung CT showed the formation of nodules and cavities in both lungs | Two sputum smears were positive. | Positive | Positive | NA | NA | Non drug resistance | Primary treatment | Confirmed active case |
| 1346 | Left inguinal mass for half a month | Lung CT showed that there were scattered patches and spotted nodules in the upper, middle and lower lungs | Negative | Negative | Positive | NA | Positive | NA | Primary treatment | Confirmed active case |
| 1347 | Cough and expectoration for 20 days | Lung CT shows that tuberculosis may be in the lower lobe of the right lung | Negative | Negative | Positive | NA | NA | Non drug resistance | Primary treatment | Confirmed active case |
| 1348 | Cough and expectoration for 4 days | Lung CT showed tuberculosis in both lungs with cavities in both upper lungs | Negative | Positive | Positive | NA | Positive | Non drug resistance | Primary treatment | Confirmed active case |
| 1349 | Cough and expectoration for 10 days | Lung CT showed multiple patches, nodules and cavities in both lungs | Three sputum smears were positive. | Positive | Positive | NA | NA | Non drug resistance | Primary treatment | Confirmed active case |
| 1350 | Cough and expectoration for 1 month | Lung CT showed tuberculosis in both lungs | One sputum smears were positive. | Negative | Positive | NA | NA | Rifampicin | Primary treatment | Confirmed active case |
| 1351 | Anti tuberculosis treatment for 4 months | Lung CT showed tuberculosis in both lungs | NA | NA | Positive | NA | NA | Non drug resistance | Primary treatment | Confirmed active case |
| 1352 | Cough and expectoration for 1 month | Lung CT showed tuberculosis with multiple cavities in both lungs | Two sputum smears were positive. | Positive | Positive | NA | Positive | Non drug resistance | Primary treatment | Confirmed active case |
| 1353 | Cough and expectoration for 3 months | Lung CT showed that there were punctate hyperdense shadows and multiple small cavities in the left upper lung and punctate hyperdense shadows in the dorsal segment of the lower lobe of the right lung | One sputum smears were positive. | Positive | Positive | NA | Positive | Non drug resistance | Primary treatment | Confirmed active case |
| 1354 | Cough and expectoration for 1 year | Lung CT showed that there were spots and patches of fuzzy increased density shadow in the lower right and left lungs, and there was strip shadow in the upper right lung | Negative | Negative | Positive | NA | Positive | Non drug resistance | Primary treatment | Confirmed active case |
| 1355 | Cough, expectoration and chest tightness for 1 month | Lung CT showed that it may be pulmonary tuberculosis in both lungs | Two sputum smears were positive. | Positive | Positive | NA | Positive | Non drug resistance | Primary treatment | Confirmed active case |
| 1356 | Anti tuberculosis treatment for 9 months | Lung CT showed tuberculosis in both lungs | One sputum smears were positive. | Positive | Positive | NA | NA | Non drug resistance | Retreatment | Confirmed active case |
| 1357 | Chest pain and fever for 4 days | Lung CT showed that there were patches of increased density in the right upper lung | Negative | Positive | Negative | NA | NA | Streptomycin, isoniazid | Primary treatment | Confirmed active case |
| 1358 | Cough for 1 month | Lung CT showed tuberculosis in both lungs | One sputum smears were positive. | Negative | Positive | NA | NA | Non drug resistance | Primary treatment | Confirmed active case |
| 1359 | Cough and expectoration for 1 month | Lung CT showed irregular cord shadows in both lungs and cavity formation in the upper lobe of the left lung | One sputum smears were positive. | Positive | NA | NA | NA | Non drug resistance | Primary treatment | Confirmed active case |
| 1360 | Cough and expectoration for 1 year | NA | One sputum smears were positive. | Positive | NA | NA | NA | Non drug resistance | Retreatment | Confirmed active case |
| 1361 | Fatigue and intermittent diarrhea for 2 months | Lung CT showed multiple inflammatory and nodular changes in both lungs | Three sputum smears were positive. | Positive | Positive | NA | NA | Non drug resistance | Primary treatment | Confirmed active case |
| 1362 | Cough and expectoration for 6 months | Lung CT showed tuberculosis in both lungs and cavity with fluid level in the right lower lung | One sputum smears were positive. | Positive | Positive | NA | NA | Non drug resistance | Primary treatment | Confirmed active case |
| 1363 | Cough and expectoration for 10 days | Lung CT showed that there were patches and nodule cavity shadows in both upper lungs | Two sputum smears were positive. | Positive | Positive | NA | NA | Non drug resistance | Retreatment | Confirmed active case |
| 1364 | Cough and expectoration for 1 month | Lung CT showed tuberculosis in both upper lungs with infection in the right lung | Negative | Positive | Positive | NA | Positive | Non drug resistance | Primary treatment | Confirmed active case |
| 1365 | Cough and expectoration for 2 months | Lung CT showed tuberculosis in the lower right lung | One sputum smears were positive. | Positive | Positive | NA | NA | Non drug resistance | Primary treatment | Confirmed active case |
| 1366 | Cough and expectoration for 2 months | Lung CT showed bronchiectasis with infection | Three sputum smears were positive. | Positive | Positive | NA | Positive | Non drug resistance | Retreatment | Confirmed active case |
| 1367 | Cough and expectoration for half a year | Lung CT showed tuberculosis in both lungs | Negative | Negative | Positive | NA | NA | Non drug resistance | Primary treatment | Confirmed active case |
| 1368 | Cough and expectoration for 3 months | Lung CT showed tuberculosis with cavity formation in both lungs | One sputum smears were positive. | Positive | NA | NA | NA | Non drug resistance | Primary treatment | Confirmed active case |
| 1369 | Cough, expectoration and hemoptysis for half a year | Lung CT showed tuberculosis with cavity in both lungs | Negative | Positive | Positive | NA | Positive | Non drug resistance | Retreatment | Confirmed active case |
| 1370 | Abdominal pain and distension for 1 month | Lung CT showed that there were infectious lesions in both lungs, which was considered to be tuberculosis | Negative | Positive | Positive | NA | Positive | NA | Primary treatment | Confirmed active case |
| 1371 | Cough and expectoration for 7 months | Lung CT showed patchy shadows in the posterior segment of the apical lobe of the left upper lung | One sputum smears were positive. | Positive | NA | NA | NA | NA | Primary treatment | Confirmed active case |
| 1372 | Cough and expectoration for 3 weeks | Lung CT showed mass foci in the lower lobe of the left lung and multiple small nodules in both lungs | Negative | Positive | Positive | NA | Positive | Non drug resistance | Primary treatment | Confirmed active case |
| 1373 | Fever for half a month | Lung CT showed that tuberculosis was the first consideration | Negative | Negative | Positive | NA | NA | Non drug resistance | Primary treatment | Confirmed active case |
| 1374 | Cough and expectoration for 2 weeks | Lung CT showed multiple tuberculosis in both lungs | Negative | Positive | Negative | NA | NA | Isoniazid | Primary treatment | Confirmed active case |
| 1375 | Cough and expectoration for 2 weeks | Lung CT showed tuberculosis in both lungs | Negative | Negative | Positive | NA | NA | Non drug resistance | Primary treatment | Confirmed active case |
| 1376 | Cough and expectoration for 10 months | Lung CT showed tuberculosis in both lungs with multiple cavities in the left lung | Three sputum smears were positive. | Positive | Positive | NA | NA | Non drug resistance | Retreatment | Confirmed active case |
| 1377 | Cough and expectoration for 1 month | Lung CT showed that it may be secondary tuberculosis in both lungs | Negative | Positive | Positive | NA | NA | NA | Primary treatment | Confirmed active case |
| 1378 | Cough and expectoration for 2 months | Lung CT showed that the first consideration was secondary pulmonary tuberculosis with cavity formation | One sputum smears were positive. | Positive | Positive | NA | Positive | Non drug resistance | Primary treatment | Confirmed active case |
| 1379 | Lung shadow for 2 days | Lung CT showed tuberculosis in both lungs | Negative | Positive | Positive | NA | Positive | Non drug resistance | Primary treatment | Confirmed active case |
| 1380 | Hemoptysis for 3 days | Lung CT showed tuberculosis in both lungs with partial damage to the left upper lung | One sputum smears were positive. | Positive | Positive | NA | Positive | Non drug resistance | Primary treatment | Confirmed active case |
| 1381 | Cough and expectoration for 1 week | NA | Two sputum smears were positive. | Positive | Positive | NA | NA | Non drug resistance | Primary treatment | Confirmed active case |
| 1382 | Cough and expectoration for 20 years | Lung CT showed inflammatory exudation in the left lower lung | One sputum smears were positive. | Positive | Negative | NA | NA | Streptomycin, rifampicin, isoniazid, ethambutol | Primary treatment | Confirmed active case |
| 1383 | Convulsion for 2 days | Lung CT showed infectious lesions in the right lung and local cavity formation in the upper lobe of the right lung. Tuberculosis cannot be excluded | Negative | Negative | Positive | NA | Positive | Non drug resistance | Primary treatment | Confirmed active case |
| 1384 | Gastric cancer was diagnosed for 1 week | Lung CT showed cavitary lesions and multiple nodules in the upper lobe of the right lung | One sputum smears were positive. | NA | Positive | NA | Positive | Non drug resistance | Primary treatment | Confirmed active case |
| 1385 | Cough and expectoration for 10 days | Lung CT showed spots and strips of high-density shadow in both lungs and cavity shadow in the lower lobe of the right lung | Negative | Positive | Positive | NA | Positive | Non drug resistance | Primary treatment | Confirmed active case |
| 1386 | Lung shadow for 6 days | Lung CT showed multiple inflammatory lesions in both lungs | One sputum smears were positive. | Positive | NA | NA | NA | Streptomycin, isoniazid | Primary treatment | Confirmed active case |
| 1387 | Fever for 20 days | Lung CT showed tuberculosis in both lungs | Negative | Positive | Positive | NA | NA | Non drug resistance | Primary treatment | Confirmed active case |
| 1388 | Lung shadow for 1 year | Lung CT showed infectious lesions in the left lung. Tuberculosis should be considered first | One sputum smears were positive. | Positive | Negative | NA | NA | Streptomycin | Primary treatment | Confirmed active case |
| 1389 | Cough and expectoration for half a year | Lung CT showed diffuse nodular, spotted and patchy density increasing shadows in both lungs | Negative | Positive | Positive | NA | NA | Non drug resistance | Primary treatment | Confirmed active case |
| 1390 | Lung shadow for 1 year | Lung CT showed infectious lesions in the dorsal segment of the lower lobe of the left lung and multiple calcifications in the lower lobe | One sputum smears were positive. | Negative | Positive | NA | Positive | Non drug resistance | Primary treatment | Confirmed active case |
| 1391 | Lung shadow for 2 days | Lung CT showed infectious lesions in the right lung, which may be tuberculosis | Negative | Negative | Positive | NA | Positive | Non drug resistance | Primary treatment | Confirmed active case |
| 1392 | Lung shadow for 2 days | Lung CT showed that there were patchy and punctate increased density shadows in the right lung, which may be tuberculosis | One sputum smears were positive. | Positive | Positive | NA | Positive | Non drug resistance | Primary treatment | Confirmed active case |
| 1393 | Hemoptysis for 20 days | Lung CT showed cavitary nodules in the lower lobe of the left lung | Negative | Positive | Positive | NA | Positive | Non drug resistance | Primary treatment | Confirmed active case |
| 1394 | Fever for half a month | Lung CT showed scattered chestnut nodules in both lungs, which may be tuberculosis | One sputum smears were positive. | Negative | Positive | NA | NA | Non drug resistance | Primary treatment | Confirmed active case |
| 1395 | Cough and expectoration for 20 days | Lung CT showed multiple patchy nodules and cavitary shadows in the upper lobe of the left lung. It is considered to be tuberculosis | Negative | Positive | Positive | NA | Positive | Non drug resistance | Retreatment | Confirmed active case |
| 1396 | Fever and chest tightness for 12 days | Lung CT showed diffuse nodules in both lungs | Negative | Positive | Positive | NA | NA | Non drug resistance | Primary treatment | Confirmed active case |
| 1397 | Lung shadow for 1 month | Lung CT showed tuberculosis with cavity formation in the lower lobe of the left lung | Negative | Positive | Positive | NA | NA | Rifampicin | Primary treatment | Confirmed active case |
| 1398 | Fever for half a month | Lung CT showed a large exudative focus in the right lower lung | One sputum smears were positive. | Positive | Positive | NA | NA | Non drug resistance | Primary treatment | Confirmed active case |
| 1399 | Left lung lesion for 1 week | Lung CT showed tuberculosis with cavity in the left upper lung | Negative | Negative | Positive | NA | Positive | Non drug resistance | Primary treatment | Confirmed active case |
| 1400 | Cough and expectoration for 1 month | Lung CT showed consolidation in the middle lobe of the right lung | One sputum smears were positive. | Positive | Positive | NA | Positive | Non drug resistance | Primary treatment | Confirmed active case |
| 1401 | Cough and expectoration for 7 months | Lung CT showed tuberculosis in both lungs with cavity formation in the right upper lung | One sputum smears were positive. | Positive | NA | NA | NA | Streptomycin, rifampicin, isoniazid, ethambutol | Primary treatment | Confirmed active case |
| 1402 | Chest pain for half a month | Lung CT showed nodular high density in the left upper lung and right lung | One sputum smears were positive. | Positive | Positive | NA | NA | Non drug resistance | Primary treatment | Confirmed active case |
| 1403 | Cough and expectoration for 8 months | Lung CT showed tuberculosis in both lungs | One sputum smears were positive. | Positive | Positive | NA | NA | Non drug resistance | Primary treatment | Confirmed active case |
| 1404 | Lung shadow for half a year | Lung CT showed scattered nodules and patchy shadows in the left upper lung | One sputum smears were positive. | Positive | Positive | NA | Positive | Non drug resistance | Primary treatment | Confirmed active case |
| 1405 | Anti tuberculosis treatment for 2 and a half months | Lung CT showed a large consolidation cavity in the right upper lung | Negative | Negative | Positive | NA | NA | Non drug resistance | Primary treatment | Confirmed active case |
| 1406 | Cough and expectoration for half a month | Lung CT showed infectious lesions in both lungs with cavity formation in the left lower lung, which is tuberculosis | One sputum smears were positive. | Positive | Positive | NA | Negative | NA | Primary treatment | Confirmed active case |
| 1407 | Cough and expectoration for half a month | Lung CT showed that there were infectious lesions with cavities in both lungs, which was considered to be tuberculosis | Negative | Negative | Positive | NA | Negative | Non drug resistance | Primary treatment | Confirmed active case |
| 1408 | Cough and expectoration for 1 day | Lung CT showed that there were spots and strips of increased density in both lungs | One sputum smears were positive. | Positive | Positive | NA | Positive | Non drug resistance | Primary treatment | Confirmed active case |
| 1409 | Cough and expectoration for 1 month | Lung CT showed scattered chestnut granular nodules in both lungs | Negative | Positive | Positive | NA | Positive | Non drug resistance | Primary treatment | Confirmed active case |
| 1410 | Cough for half a year | Lung CT showed consolidation with cavity formation in the upper left lung and scattered nodule shadow in the lower left lung | One sputum smears were positive. | Positive | Positive | NA | Positive | Non drug resistance | Primary treatment | Confirmed active case |
| 1411 | Cough and expectoration for half a year | Lung CT showed nodular shadow in the left lung | One sputum smears were positive. | Positive | Positive | NA | Positive | Non drug resistance | Primary treatment | Confirmed active case |
| 1412 | Cough and expectoration for half a year | Lung CT showed tuberculosis in both lungs | One sputum smears were positive. | Positive | Positive | NA | Positive | Non drug resistance | Primary treatment | Confirmed active case |
| 1413 | Cough and expectoration for 10 years | Lung CT showed tuberculosis in both lungs | One sputum smears were positive. | Positive | Positive | NA | NA | Isoniazid | Retreatment | Confirmed active case |
| 1414 | Fever for 1 month | Lung CT showed multiple nodules and some cavities in both lungs | Negative | Negative | Positive | NA | Positive | Non drug resistance | Primary treatment | Confirmed active case |
| 1415 | Cough and expectoration for 2 months | Lung CT showed infectious lesions in the upper lobe of the left lung, and tuberculosis could not be excluded | One sputum smears were positive. | Positive | Positive | NA | Positive | Non drug resistance | Primary treatment | Confirmed active case |
| 1416 | Cough and expectoration for half a month | Lung CT showed infectious lesions in the upper lobe of the left lung, and tuberculosis could not be excluded | Negative | Positive | Positive | NA | Positive | Non drug resistance | Primary treatment | Confirmed active case |
| 1417 | Lung shadow for 1 day | Lung CT showed mass shadow in the right upper lung, and tuberculosis should be excluded | Negative | Positive | Positive | NA | Positive | Non drug resistance | Primary treatment | Confirmed active case |
| 1418 | Cough and shortness of breath for half a month | Lung CT showed tuberculosis in the right lung | Negative | Positive | Positive | NA | NA | Non drug resistance | Primary treatment | Confirmed active case |
| 1419 | Cough and expectoration for 1 month | Lung CT showed infection in both lungs, which may be tuberculosis | Negative | Positive | Negative | NA | NA | NA | Primary treatment | Confirmed active case |
| 1420 | Cough and expectoration for 10 years | Lung CT showed spotted nodules and strip-like high-density shadows in both lungs | Negative | Positive | Positive | NA | Positive | Non drug resistance | Primary treatment | Confirmed active case |
| 1421 | Lung shadow for 5 days | Lung CT showed that there were scattered patches and dot strip density shadows in both lungs, and multiple irregular cavities in both upper lungs | One sputum smears were positive. | Positive | Positive | NA | Positive | Non drug resistance | Primary treatment | Confirmed active case |
| 1422 | Cough and sore throat for 2 months | Lung CT showed that there were spots, patches and strips of increased density in both lungs | Negative | Negative | Positive | NA | Negative | Non drug resistance | Primary treatment | Confirmed active case |
| 1423 | Pulmonary lesions for 3 years | Lung CT showed multiple lesions and partial cavity formation in both lungs | Negative | Negative | Positive | NA | Positive | Non drug resistance | Primary treatment | Confirmed active case |
| 1424 | Cough for 1 month | lung CT showed that the first consideration was tuberculosis with cavity in the right lung | One sputum smears were positive. | Positive | Positive | NA | Positive | Non drug resistance | Primary treatment | Confirmed active case |
| 1425 | Lung shadow for half a year | Lung CT shows that tuberculosis cannot be excluded | Negative | Positive | Positive | NA | Positive | Non drug resistance | Retreatment | Confirmed active case |
| 1426 | Cough, expectoration for 10 days, hemoptysis for 3 days | Lung CT showed infectious lesions with cavities in the lower lobe of the left lung, which may be pulmonary tuberculosis | Two sputum smears were positive. | Positive | Positive | NA | NA | Non drug resistance | Primary treatment | Confirmed active case |
| 1427 | Lung shadow for 10 months | Lung CT showed spots and stripes in the left upper hilar | Negative | Negative | Positive | NA | NA | Non drug resistance | Primary treatment | Confirmed active case |
| 1428 | Fever for 1 month | Lung CT showed that there were a few spots and stripes and small nodular increased density shadow in both lungs | Negative | Negative | Positive | NA | Positive | NA | Primary treatment | Confirmed active case |
| 1429 | Cough and expectoration for 1 month | Lung CT shows that tuberculosis may be in the left and right upper lungs | Negative | Positive | Positive | NA | NA | Non drug resistance | Primary treatment | Confirmed active case |
| 1430 | Cough for 2 years and hemoptysis for 3 days | Lung CT showed tuberculosis in both lungs | One sputum smears were positive. | Positive | Positive | NA | NA | Non drug resistance | Primary treatment | Confirmed active case |
| 1431 | Cough for half a month | Lung CT showed patchy nodules in the right upper lung | Two sputum smears were positive. | NA | NA | NA | NA | NA | Primary treatment | Confirmed active case |
| 1432 | Lung shadow for 1 week | Lung CT showed scattered infectious lesions in the upper lobe of the right lung, so tuberculosis should be excluded | One sputum smears were positive. | Positive | Positive | NA | Positive | Non drug resistance | Primary treatment | Confirmed active case |
| 1433 | Fever for 10 days | Lung CT showed nodules with cavities in the apical segment of the upper lobe of the left lung, and diffuse chestnut nodules in the remaining lungs | One sputum smears were positive. | NA | NA | NA | Positive | NA | Primary treatment | Confirmed active case |
| 1434 | Anti tuberculosis treatment for half a month | Lung CT showed that there were scattered patches and punctate shadows in both lungs | Negative | Positive | Positive | NA | NA | Streptomycin, isoniazid | Primary treatment | Confirmed active case |
| 1435 | Anti tuberculosis treatment for 11 months | Lung CT showed tuberculosis in the lower right lung | Negative | Negative | Positive | NA | NA | Non drug resistance | Primary treatment | Confirmed active case |
| 1436 | Pulmonary lesions for 4 days | Lung CT showed tuberculosis in both lungs with local cavity formation | Negative | Positive | Positive | NA | Positive | Non drug resistance | Primary treatment | Confirmed active case |
| 1437 | Cough and expectoration for 1 year | Lung CT showed patchy strip high-density shadow in both lungs | Negative | Positive | Positive | NA | NA | Non drug resistance | Primary treatment | Confirmed active case |
| 1438 | Cough and expectoration for half a month | Lung CT showed tuberculosis in both lungs | One sputum smears were positive. | Positive | NA | NA | Positive | Non drug resistance | Primary treatment | Confirmed active case |
| 1439 | Cough and expectoration for 10 days | Lung CT showed scattered multiple patches and cavity shadows in both lungs | One sputum smears were positive. | Negative | Positive | NA | Positive | Non drug resistance | Primary treatment | Confirmed active case |
| 1440 | Lose weight for 1 year | Lung CT showed tuberculosis in both lungs with cavity formation in both upper lungs | Negative | Positive | Positive | NA | NA | Non drug resistance | Primary treatment | Confirmed active case |
| 1441 | Cough and expectoration for 20 years | Lung CT showed that there were spots and flakes of increased density in both lungs | Negative | Positive | Positive | NA | Negative | Non drug resistance | Primary treatment | Confirmed active case |
| 1442 | Cough and expectoration for 1 month | Lung CT showed that there were spots and stripes of increased density in both lungs | Negative | Negative | Positive | NA | Negative | Non drug resistance | Primary treatment | Confirmed active case |
| 1443 | Cough and expectoration for 3 months | Lung CT showed tuberculosis with multiple cavities in both lungs | Three sputum smears were positive. | Positive | Positive | NA | Positive | Non drug resistance | Retreatment | Confirmed active case |
| 1444 | Cough and expectoration for 3 months | Lung CT showed tuberculosis in both lungs | Negative | Negative | Positive | NA | NA | Non drug resistance | Primary treatment | Confirmed active case |
| 1445 | Cough and expectoration for 1 month | Lung CT showed old pulmonary tuberculosis and secondary infection in the right lung | One sputum smears were positive. | Positive | Positive | NA | Positive | Non drug resistance | Primary treatment | Confirmed active case |
| 1446 | Cough and expectoration for 4 months | Lung CT showed tuberculosis in both lungs | Two sputum smears were positive. | Negative | Negative | NA | Positive | NA | Primary treatment | Confirmed active case |
| 1447 | Tuberculosis for 4 years | Lung CT showed that tuberculosis was first considered in both lungs | Negative | Positive | Positive | NA | Positive | Non drug resistance | Retreatment | Confirmed active case |
| 1448 | Lung shadow for 1 month | Lung CT showed that there were scattered patches and punctate increased density shadows in the right upper lung, and there were patches and small nodules in both lungs | Negative | Negative | Positive | NA | NA | Isoniazid | Primary treatment | Confirmed active case |
| 1449 | Lung shadow for 1 month | Lung CT showed tuberculosis in both lungs | Negative | Positive | NA | NA | NA | Non drug resistance | Primary treatment | Confirmed active case |
| 1450 | Cough and expectoration for 1 month and sputum and blood for 5 days | Lung CT showed multiple patches, nodules and multiple cavities in both lungs | Two sputum smears were positive. | Positive | Positive | NA | Positive | Non drug resistance | Primary treatment | Confirmed active case |
| 1451 | Cough, expectoration for 10 days, hemoptysis for 3 days | Lung CT showed multiple patches, nodules and multiple cavities in both lungs | Negative | Positive | Positive | NA | Positive | Non drug resistance | Primary treatment | Confirmed active case |
| 1452 | Cough for 1 year | Lung CT showed that there were nodular, patchy high-density shadows in both lungs | One sputum smears were positive. | Positive | Positive | NA | Positive | Non drug resistance | Primary treatment | Confirmed active case |
| 1453 | Lung shadow for 3 months | Lung CT showed patchy increased density shadows in the upper and lower lobes of both lungs | Negative | Negative | Positive | NA | Positive | NA | Primary treatment | Confirmed active case |
| 1454 | Lung shadow for 1 week | Lung CT showed a few patches and nodules in the tongue segment of the left upper lung | Negative | Negative | Positive | NA | NA | Non drug resistance | Primary treatment | Confirmed active case |
| 1455 | Cough for 2 days | Lung CT showed patchy shadows in the left upper lung | Negative | Negative | Positive | NA | NA | Non drug resistance | Primary treatment | Confirmed active case |
| 1456 | Cough and expectoration for 2 months | Lung CT showed infectious lesions in both lungs and cavity formation in the lower lobe of the left lung | Negative | Negative | Positive | NA | Positive | Non drug resistance | Primary treatment | Confirmed active case |
| 1457 | Cough and expectoration for 5 days | Lung CT showed tuberculosis in the upper lobe of the left lung | Negative | Negative | Positive | NA | Positive | NA | Primary treatment | Confirmed active case |
| 1458 | Cough and expectoration for 2 weeks | Lung CT showed multiple mass shadows with cavities in both lungs | Negative | Negative | Positive | NA | NA | Non drug resistance | Primary treatment | Confirmed active case |
| 1459 | Cough for 3 years | Lung CT showed scattered infection in both lungs and consolidation in the right lower lung | Two sputum smears were positive. | Positive | NA | NA | Positive | NA | Primary treatment | Confirmed active case |
| 1460 | Lung shadow for 5 days | Lung CT showed multiple inflammatory lesions with cavity formation in the right lung | One sputum smears were positive. | Positive | Positive | NA | Positive | Streptomycin, isoniazid | Primary treatment | Confirmed active case |
| 1461 | Cough and expectoration for 4 months | Lung CT showed tuberculosis in both lungs | One sputum smears were positive. | Positive | Positive | NA | NA | Non drug resistance | Primary treatment | Confirmed active case |
| 1462 | Lung shadow for 1 month | Lung CT showed multiple nodules with cavity formation in both lungs, so tuberculosis should be excluded | Negative | Negative | Positive | NA | NA | NA | Primary treatment | Confirmed active case |
| 1463 | Fever for 20 days | Lung CT showed multiple chestnut nodules in both lungs, and blood type disseminated pulmonary tuberculosis could not be ruled out | Negative | Positive | Positive | NA | NA | Non drug resistance | Primary treatment | Confirmed active case |
| 1464 | Fever for 10 days | Lung CT showed multiple nodular high-density shadows in both lungs | Negative | Positive | Positive | NA | NA | Non drug resistance | Primary treatment | Confirmed active case |
| 1465 | Cough and expectoration for 1 year | Lung CT showed infectious lesions in both lungs. Tuberculosis should be considered first | Negative | Positive | Positive | NA | Positive | Streptomycin | Primary treatment | Confirmed active case |
| 1466 | Anti tuberculosis treatment for 1 week | Lung CT showed tuberculosis in the upper lobe of the right lung | Negative | Positive | Positive | NA | NA | NA | Primary treatment | Confirmed active case |
| 1467 | Lung shadow for 2 days | Lung CT showed that tuberculosis was first considered in the right upper lung | Negative | Negative | Positive | NA | NA | Non drug resistance | Primary treatment | Confirmed active case |
| 1468 | Chest tightness and shortness of breath for 10 days | Lung CT showed that tuberculosis in both lungs needed to be excluded | One sputum smears were positive. | Positive | Positive | NA | NA | Non drug resistance | Primary treatment | Confirmed active case |
| 1469 | Cough and expectoration for half a month | Lung CT showed multiple large consolidation shadows in the left lung and scattered multiple nodules on both sides | Three sputum smears were positive. | Positive | Positive | NA | Positive | Non drug resistance | Retreatment | Confirmed active case |
| 1470 | Cough and expectoration for 2 months | Lung CT showed small nodules in the lower lobes of both lungs | One sputum smears were positive. | Positive | Positive | NA | NA | Rifampicin, isoniazid, ethambutol | Primary treatment | Confirmed active case |
| 1471 | Cough and fever for 1 week | Lung CT showed infection in both lungs, which may be tuberculosis | Negative | Positive | Negative | NA | Positive | Isoniazid | Primary treatment | Confirmed active case |
| 1472 | Cough for 1 year | Lung CT showed infection in both lungs, which may be tuberculosis in both lungs.There is cavity formation in the left upper lung. | One sputum smears were positive. | Positive | Positive | NA | Positive | Non drug resistance | Primary treatment | Confirmed active case |
| 1473 | Cough and expectoration for 5 years | Lung CT showed infectious lesions in both lungs with cavities in the right upper lung | One sputum smears were positive. | Positive | Negative | NA | NA | Streptomycin, rifampicin, isoniazid, ethambutol | Primary treatment | Confirmed active case |
| 1474 | Hoarseness for 1 month | Lung CT showed multiple lesions with cavity formation in the right lung | One sputum smears were positive. | Positive | Positive | NA | Positive | Non drug resistance | Primary treatment | Confirmed active case |
| 1475 | Antituberculosis treatment for 1 month | Lung CT showed multiple and multiform lesions and local cavity formation in the right lung, which may be tuberculosis | Negative | Negative | Positive | NA | NA | NA | Primary treatment | Confirmed active case |
| 1476 | Cough and expectoration for 2 weeks | Lung CT showed atelectasis in the lower lobe of the left lung with infection in the left lung | Negative | Positive | Positive | Pathology showed that acid fast bacilli was positive | NA | Non drug resistance | Primary treatment | Confirmed active case |
| 1477 | Cough and expectoration for 2 months | Lung CT showed that there were patches, spots, nodules and strips of increased density in both lungs | One sputum smears were positive. | Positive | Positive | NA | Positive | Non drug resistance | Primary treatment | Confirmed active case |
| 1478 | Fever for 8 months | Lung CT showed diffuse lesions in both lungs and consolidation in the lower lobe of the left lung | One sputum smears were positive. | Positive | Positive | NA | NA | NA | Primary treatment | Confirmed active case |
| 1479 | Cough and chest tightness for 5 months | Lung CT showed patchy high-density shadow in both lungs | Two sputum smears were positive. | Positive | Positive | NA | NA | Non drug resistance | Primary treatment | Confirmed active case |
| 1480 | Hemoptysis for 20 days | Lung CT showed tuberculosis in the upper lobe of the right lung and cavity formation in the lower left lung | Negative | Positive | Positive | NA | NA | Non drug resistance | Primary treatment | Confirmed active case |
| 1481 | Cough and expectoration for half a year | Lung CT showed tuberculosis in both lungs and cavity formation in the lower lobe of the left lung | Negative | Positive | Positive | NA | NA | NA | Retreatment | Confirmed active case |
| 1482 | Cough and expectoration for 1 week | Lung CT showed tuberculosis with infection in both lungs | Negative | Positive | Positive | NA | Positive | Non drug resistance | Primary treatment | Confirmed active case |
| 1483 | Fever for 1 week | Lung CT showed tuberculosis in the left lung | Negative | Negative | Positive | NA | Positive | Non drug resistance | Primary treatment | Confirmed active case |
| 1484 | Cough and expectoration for 5 months | Lung CT showed that there were lumpy high-density shadows and cavities in the upper lobes of both lungs | One sputum smears were positive. | Positive | Positive | NA | Positive | Streptomycin, isoniazid | Primary treatment | Confirmed active case |
| 1485 | Abdominal distension and anorexia for 2 months | Lung CT showed diffuse chestnut shadow in both lungs | Negative | Negative | Positive | NA | NA | Non drug resistance | Primary treatment | Confirmed active case |
| 1486 | Cough, expectoration and fever for 2 days | Lung CT showed tuberculosis in both lungs with partial consolidation and cavity in the right upper lung | Negative | Positive | Positive | NA | Positive | Non drug resistance | Primary treatment | Confirmed active case |
| 1487 | Cough and expectoration for 3 months | Lung CT showed that there were scattered spots, strips and nodules in the upper lobe of the left lung | Two sputum smears were positive. | Positive | NA | NA | Positive | NA | Primary treatment | Confirmed active case |
| 1488 | Cough and expectoration for half a month | Lung CT showed tuberculosis in both lungs | Negative | Positive | NA | NA | NA | Non drug resistance | Primary treatment | Confirmed active case |
| 1489 | Cough and expectoration for 4 months | Lung CT showed partial damage in the left upper lung, which may be tuberculosis | One sputum smears were positive. | Positive | NA | NA | NA | NA | Primary treatment | Confirmed active case |
| 1490 | Cough and expectoration for half a year | Lung CT showed that it may be tuberculosis in both lungs | Negative | Positive | Positive | NA | Positive | Non drug resistance | Primary treatment | Confirmed active case |
| 1491 | Anti tuberculosis treatment for 2 weeks | Lung CT showed tuberculosis in both lungs | Negative | Positive | Positive | NA | Positive | Non drug resistance | Primary treatment | Confirmed active case |
| 1492 | Abdominal pain for 9 months | Lung CT showed tuberculosis in both lungs | Negative | Positive | Positive | NA | Positive | Non drug resistance | Primary treatment | Confirmed active case |
| 1493 | Cough for 2 months | Lung CT showed multiple infection foci with exudation in both lungs | Two sputum smears were positive. | Positive | NA | NA | NA | Rifampicin, isoniazid | Primary treatment | Confirmed active case |
| 1494 | Cough and expectoration for 20 days | Lung CT showed tuberculosis in both lungs | Negative | Positive | Positive | NA | Positive | Non drug resistance | Primary treatment | Confirmed active case |
| 1495 | Fever for 1 week | Lung CT showed infectious lesions in the right lung, which may be tuberculosis | Negative | Positive | Positive | NA | Positive | NA | Primary treatment | Confirmed active case |
| 1496 | Lung shadow for 3 days | Lung CT showed tuberculosis in both lungs | One sputum smears were positive. | Positive | Positive | NA | NA | Non drug resistance | Primary treatment | Confirmed active case |
| 1497 | Cough and expectoration for half a year | Lung CT showed that there were speckles and punctate increased density shadows in both lungs | One sputum smears were positive. | Positive | Positive | NA | NA | Non drug resistance | Primary treatment | Confirmed active case |
| 1498 | Cough and expectoration for 2 months | Lung CT showed tuberculosis with cavity in both lungs | Negative | Positive | Positive | NA | Positive | Isoniazid | Primary treatment | Confirmed active case |
| 1499 | Lung shadow for 2 days | Lung CT showed patchy shadow in the right upper lung, and active pulmonary tuberculosis could not be excluded | Negative | Positive | Positive | NA | Positive | Rifampicin | Primary treatment | Confirmed active case |
| 1500 | Cough and expectoration for half a month | Lung CT showed infection in both lungs | One sputum smears were positive. | Positive | Positive | NA | NA | Non drug resistance | Primary treatment | Confirmed active case |
| 1501 | Antituberculosis treatment for 2 months | Lung CT showed that it may be tuberculosis in both lungs | Negative | Negative | Positive | NA | NA | Rifampicin | Primary treatment | Confirmed active case |
| 1502 | Active shortness of breath for 25 years | Lung CT showed tuberculosis with cavity in both lungs | One sputum smears were positive. | Positive | Positive | NA | Positive | Non drug resistance | Primary treatment | Confirmed active case |
| 1503 | Lung shadow for 3 days | Lung CT showed that there were lesions in the upper and lower lobes of the right lung, and tuberculosis needed to be discharged | Negative | Positive | Positive | NA | NA | Non drug resistance | Primary treatment | Confirmed active case |
| 1504 | Cough and expectoration for 2 months | Lung CT showed tuberculosis in both lungs | Negative | Negative | Positive | NA | NA | NA | Primary treatment | Confirmed active case |
| 1505 | Cough and expectoration for 1 month | Lung CT showed patches and nodular hyperdense shadows in the right upper lung | Negative | Positive | Positive | NA | NA | Non drug resistance | Primary treatment | Confirmed active case |
| 1506 | Fatigue and emaciation for half a year | Lung CT showed multiple patchy shadows and nodular high-density shadows in both lungs | Negative | Positive | Positive | NA | Negative | Streptomycin, rifampicin, isoniazid, ethambutol | Primary treatment | Confirmed active case |
| 1507 | Cough and expectoration for half a year | Lung CT showed tuberculosis in the upper lobes of both lungs | Negative | Positive | Positive | NA | Positive | Non drug resistance | Primary treatment | Confirmed active case |
| 1508 | Cough and expectoration for half a year | Lung CT showed multiple patchy hyperdense shadows in both lungs | Negative | Positive | Positive | NA | NA | NA | Primary treatment | Confirmed active case |
| 1509 | Cough for 2 weeks | Lung CT showed scattered multiple patches and punctate increased density shadows in both lungs and cavities in the left upper lung | One sputum smears were positive. | Positive | Positive | NA | NA | Non drug resistance | Primary treatment | Confirmed active case |
| 1510 | Hemoptysis for 3 days | Lung CT showed tuberculosis and small cavity formation in the upper lobe of the left lung | One sputum smears were positive. | NA | Positive | NA | NA | Non drug resistance | Primary treatment | Confirmed active case |
| 1511 | Cough and expectoration for 7 months | Lung CT showed small nodules in both lungs and ground glass nodules in the upper lobe of the left lung | One sputum smears were positive. | Positive | Positive | NA | NA | Non drug resistance | Primary treatment | Confirmed active case |
| 1512 | Anti tuberculosis treatment for 9 months | Lung CT showed tuberculosis in the right lung | Negative | Negative | Positive | NA | NA | Non drug resistance | Primary treatment | Confirmed active case |
| 1513 | Fatigue and chest tightness for half a month | Lung CT showed nodular shadows in the upper left lung and scattered patchy cord shadows in the upper left lung and lower left lung | Negative | Negative | Positive | NA | NA | Non drug resistance | Primary treatment | Confirmed active case |
| 1514 | Cough and expectoration for 2 months | Lung CT showed old tuberculosis in both lungs and atelectasis in the upper right lung | One sputum smears were positive. | Positive | NA | NA | NA | Non drug resistance | Primary treatment | Confirmed active case |
| 1515 | Repeated hemoptysis for 2 years | Lung CT showed scattered patches and nodules in both lungs | Two sputum smears were positive. | Negative | Negative | NA | Positive | NA | Primary treatment | Confirmed active case |
| 1516 | Cough and expectoration for 20 days | Lung CT showed that there were multiple divergent patchy density increasing shadows and cavity formation in the right upper middle lung | Negative | Negative | Positive | NA | Positive | NA | Primary treatment | Confirmed active case |
| 1517 | Cough and expectoration for 3 years | Lung CT showed scattered tuberculosis in both lungs | One sputum smears were positive. | Positive | Positive | NA | Positive | Non drug resistance | Primary treatment | Confirmed active case |
| 1518 | Neck mass for 20 days | Lung CT showed tuberculosis in both lungs | One sputum smears were positive. | Positive | Positive | NA | NA | Non drug resistance | Primary treatment | Confirmed active case |
| 1519 | Cough for 2 months and hemoptysis for 5 days | Lung CT showed multiple nodules, mass foci and small cavities in the lower lobes of both lungs | One sputum smears were positive. | Positive | Negative | NA | NA | NA | Primary treatment | Confirmed active case |
| 1520 | Cough and expectoration for 30 years | Lung CT showed multiple nodules in both lungs, which considered old pulmonary tuberculosis | Negative | Positive | Positive | NA | NA | Non drug resistance | Primary treatment | Confirmed active case |
| 1521 | Lung shadow for 1 year | Lung CT showed that there were spots and strips of high-density shadows in both lungs | Negative | Negative | Positive | NA | NA | NA | Retreatment | Confirmed active case |
| 1522 | Cough and expectoration for 2 years | Lung CT showed tuberculosis with cavity in both lungs | One sputum smears were positive. | Positive | Positive | NA | Positive | Isoniazid | Retreatment | Confirmed active case |
| 1523 | Weight loss for 1 month | Lung CT showed multiple nodules and patches in both lungs | Two sputum smears were positive. | Positive | Positive | NA | NA | Non drug resistance | Retreatment | Confirmed active case |
| 1524 | Blood in sputum for 2 days | Lung CT showed exudative shadow with cavity in the upper lobe of the left lung | One sputum smears were positive. | Positive | Positive | NA | Positive | Isoniazid | Primary treatment | Confirmed active case |
| 1525 | Cough and expectoration for 1 month | Lung CT showed patchy exudation in the upper lobe of the right lung | Two sputum smears were positive. | Negative | Negative | NA | Negative | NA | Primary treatment | Confirmed active case |
| 1526 | Cough and expectoration for 20 days | Lung CT showed infection in both lungs with cavity formation, which is considered to be tuberculosis | Negative | Positive | Positive | NA | NA | Non drug resistance | Primary treatment | Confirmed active case |
| 1527 | Cough and expectoration for 1 month | Lung CT showed tuberculosis in both lungs | Two sputum smears were positive. | Positive | Positive | NA | Positive | Non drug resistance | Primary treatment | Confirmed active case |
| 1528 | Cough and expectoration for 20 days | Lung CT showed patchy nodular shadow with cavity in the right upper lung | Two sputum smears were positive. | Positive | NA | NA | NA | NA | Primary treatment | Confirmed active case |
| 1529 | Right neck mass for 20 days | Lung CT showed scattered patches and nodules in both lungs and mass shadows with cavity formation in the upper right lung | Negative | Positive | Negative | The tissues were positive for Mycobacterium tuberculosis X-Pert. | NA | Non drug resistance | Primary treatment | Confirmed active case |
| 1530 | Cough and expectoration for 3 years | Lung CT showed secondary pulmonary tuberculosis in both lungs | One sputum smears were positive. | Positive | Positive | NA | NA | Non drug resistance | Primary treatment | Confirmed active case |
| 1531 | Cough and expectoration for 1 month | Lung CT showed infection consolidation in the middle and lower lobe of the right lung | Negative | Positive | Positive | NA | NA | Non drug resistance | Primary treatment | Confirmed active case |
| 1532 | Fatigue and chest tightness for half a month | Lung CT showed that there were mass and nodule shadows in the left upper lung and patch and cord like increased density shadows in the left lower lung | Negative | Negative | Positive | NA | NA | NA | Primary treatment | Confirmed active case |
| 1533 | Hemoptysis for 4 days | Lung CT showed tuberculosis in both lungs with cavity formation in the left upper lung | One sputum smears were positive. | Negative | Negative | NA | NA | NA | Retreatment | Confirmed active case |
| 1534 | Cough and expectoration for 3 years and hemoptysis for 2 weeks | Lung CT showed tuberculosis with cavity formation in both lungs | Two sputum smears were positive. | Positive | Positive | NA | NA | Non drug resistance | Primary treatment | Confirmed active case |
| 1535 | Cough and expectoration for 1 week | Lung CT showed inflammation in both lungs | One sputum smears were positive. | Positive | Positive | NA | NA | Non drug resistance | Primary treatment | Confirmed active case |
| 1536 | Abdominal pain for 2 days | Lung CT showed tuberculosis in both lungs | One sputum smears were positive. | Positive | Positive | NA | Positive | Non drug resistance | Primary treatment | Confirmed active case |
| 1537 | Cough and expectoration for 20 days | Lung CT showed diffuse lesions in both lungs and a small amount of cavities in both upper lungs | Negative | Positive | Negative | NA | Positive | Non drug resistance | Primary treatment | Confirmed active case |
| 1538 | Repeated cough and expectoration for 5 years | Lung CT showed tuberculosis in both lungs | One sputum smears were positive. | Positive | Positive | NA | NA | Non drug resistance | Retreatment | Confirmed active case |
| 1539 | Lose weight for 3 months | Lung CT showed infectious lesions in both lungs | One sputum smears were positive. | Positive | Positive | NA | NA | Non drug resistance | Primary treatment | Confirmed active case |
| 1540 | Cough and expectoration for half a year | Lung CT showed diffuse chestnut shadow in both lungs. Blood seeding of tuberculosis should be considered first | Negative | Positive | Positive | NA | NA | Non drug resistance | Primary treatment | Confirmed active case |
| 1541 | Lung shadow for half a month | Lung CT showed scattered nodules in the left upper lung | Negative | Positive | Negative | NA | NA | Non drug resistance | Primary treatment | Confirmed active case |
| 1542 | Hemoptysis for 20 days | Lung CT showed tuberculosis in the upper lobes of both lungs | Negative | Negative | Positive | NA | NA | Non drug resistance | Retreatment | Confirmed active case |
| 1543 | Cough for half a year | Lung CT shows that there may be tuberculosis in both lungs | One sputum smears were positive. | Positive | Positive | NA | Positive | Non drug resistance | Primary treatment | Confirmed active case |
| 1544 | Cough and expectoration for 1 year | Lung CT showed cavity formation in the left upper lung, which may be tuberculosis | Negative | Negative | Positive | NA | NA | Non drug resistance | Retreatment | Confirmed active case |
| 1545 | Cough and expectoration for half a year | Lung CT showed spots and strip-shaped high-density shadows in both lungs | Negative | Positive | Positive | NA | NA | Non drug resistance | Primary treatment | Confirmed active case |
| 1546 | Hemoptysis for half a year | Lung CT showed nodules with cavities in the right upper lung | Negative | Negative | Positive | NA | NA | Non drug resistance | Primary treatment | Confirmed active case |
| 1547 | Cough for 5 days | Lung CT showed that it may be tuberculosis in both lungs | Negative | Positive | Positive | NA | Positive | Non drug resistance | Primary treatment | Confirmed active case |
| 1548 | Cough for 2 weeks | Lung CT showed patches and small nodules in the upper and lower lobes of the left lung, which may be tuberculosis | Negative | Positive | Positive | NA | NA | Non drug resistance | Primary treatment | Confirmed active case |
| 1549 | Lung shadow for 4 months | Lung CT showed tuberculosis in the upper lobe of the left lung | Negative | Negative | Positive | NA | NA | Non drug resistance | Primary treatment | Confirmed active case |
| 1550 | Cough for 3 days | Lung CT showed patchy exudation shadow in the left lung and a cavity in the left upper lung | Negative | Negative | Positive | NA | Positive | Non drug resistance | Primary treatment | Confirmed active case |
| 1551 | Fever for 10 days | Lung CT showed chestnut tuberculosis in both lungs | Negative | Negative | Positive | NA | Positive | Non drug resistance | Primary treatment | Confirmed active case |
| 1552 | Cough and expectoration for 1 month | Lung CT showed patchy nodule shadow in the left upper middle and right upper lung and cavity formation in the right upper lung | Negative | Positive | Positive | NA | Positive | Non drug resistance | Primary treatment | Confirmed active case |
| 1553 | Pleural effusion for 5 days | Lung CT showed diffuse lesions and blood disseminated pulmonary tuberculosis in both lungs | One sputum smears were positive. | NA | NA | NA | NA | NA | Primary treatment | Confirmed active case |
| 1554 | Cough and expectoration for 2 months | Lung CT showed tuberculosis in both lungs | Negative | Positive | Positive | NA | Positive | Streptomycin | Retreatment | Confirmed active case |
[truncated: 76,982 more chars]
